# Supplementary material for: Synthesis and Characterization of Bis-Triazolyl-Pyridine Derivatives as Noncanonical DNA-Interacting Compounds
Source: MDPI journal article supplement (doi:10.3390/ijms222111959), 2021-11-04
Supplement: s1 [file s1]

# Synthesis and Characterization of Bis-Triazolyl-Pyridine Derivatives as Noncanonical DNA-Interacting Compounds

**Anna Di Porzio**<sup>1,†</sup>, **Ubalda Galli**<sup>2,†</sup>, **Jussara Amato**<sup>1</sup>, **Pasquale Zizza**<sup>3</sup>, **Sara Iachettini**<sup>3</sup>, **Nunzia Iaccarino**<sup>1</sup>, **Simona Marzano**<sup>1</sup>, **Federica Santoro**<sup>1</sup>, **Diego Brancaccio**<sup>1</sup>, **Alfonso Carotenuto**<sup>1</sup>, **Stefano De Tito**<sup>4,5</sup>, **Annamaria Biroccio**<sup>3</sup>, **Bruno Pagano**<sup>1</sup>, **Gian Cesare Tron**<sup>2,\*</sup> and **Antonio Randazzo**<sup>1,\*</sup>

<sup>1</sup> Department of Pharmacy, University of Naples Federico II, Via D. Montesano 49, 80131 Naples, Italy; anna.diporzio@unina.it (A.D.); jussara.amato@unina.it (J.A.); nunzia.iaccarino@unina.it (N.I.); simona.marzano@unina.it (S.M.); federica.santoro@unina.it (F.S.); diego.brancaccio@unina.it (D.B.); alfonso.carotenuto@unina.it (A.C.); bruno.pagano@unina.it (B.P.)

<sup>2</sup> Department of Pharmaceutical Sciences, University of Piemonte Orientale, Largo Donegani 2/3, 28100 Novara, Italy; ubaldina.galli@uniupo.it (U.G.)

<sup>3</sup> Oncogenomic and Epigenetic Unit, IRCCS-Regina Elena National Cancer Institute, 00144 Rome, Italy; pasquale.zizza@ifo.gov.it (P.Z.); sara.iachettini@ifo.gov.it (S.I.); annamaria.biroccio@ifo.gov.it (A.B.)

<sup>4</sup> Molecular Cell Biology of Autophagy, The Francis Crick Institute, 1 Midland Road, London NW1 1AT, UK; stefano.de-tito@crick.ac.uk

<sup>5</sup> Institute of Experimental Endocrinology and Oncology, National Research Council, 80131 Naples, Italy

<sup>†</sup> These authors contributed equally to the work.

\* Correspondence: antonio.randazzo@unina.it (A.R.), Tel.: +39081678514; giancesare.tron@uniupo.it (G.C.T.), Tel.: +390321375857

| <b>Table of contents</b>                        | <b>Page</b> |
|-------------------------------------------------|-------------|
| General Procedures for the Synthesis of Alkynes | S3          |
| Figure S1                                       | S10         |
| Figure S2                                       | S11         |
| Figure S3                                       | S12         |
| Figure S4                                       | S13         |
| Figure S5                                       | S14         |
| Figure S6                                       | S15         |
| Figure S7                                       | S16         |
| Figure S8                                       | S17         |
| Figure S9                                       | S18         |
| Table S1                                        | S19         |
| Table S2                                        | S20         |
| Table S3                                        | S21         |
| Figure S10                                      | S22         |
| Figure S11                                      | S22         |
| Figure S12                                      | S23         |
| Figure S13                                      | S23         |
| Figure S14                                      | S24         |
| Figure S15                                      | S25         |
| Figure S16                                      | S26         |
| Figure S17                                      | S27         |
| Figure S18                                      | S28         |
| Figure S19                                      | S29         |
| Figure S20                                      | S30         |
| Figure S21                                      | S31         |
| Figure S22                                      | S32         |
| Figure S23                                      | S33         |
| Figure S24                                      | S34         |
| Figure S25                                      | S35         |
| Figure S26                                      | S36         |
| Figure S27                                      | S37         |
| Figure S28                                      | S38         |
| Figure S29                                      | S39         |
| Figure S30                                      | S40         |
| Figure S31                                      | S41         |
| Figure S32                                      | S42         |
| Figure S33                                      | S43         |
| Figure S34                                      | S44         |
| Figure S35                                      | S45         |
| Figure S36                                      | S46         |
| Figure S37                                      | S47         |
| Figure S38                                      | S48         |
| Figure S39                                      | S49         |
| Figure S40                                      | S50         |
| Figure S41                                      | S51         |
| Figure S42                                      | S52         |
| Figure S43                                      | S53         |
| Figure S44                                      | S54         |
| Figure S45                                      | S55         |
| Figure S46                                      | S56         |
| Figure S47                                      | S57         |
| Figure S48                                      | S58         |
| References                                      | S59         |

## General Procedures for the Synthesis of Alkynes

### General procedure A for the synthesis of alkynes **5a-14a** (series a)

To a solution of the corresponding secondary amine (2 equiv) in dry THF (1.5 M),  $K_2CO_3$  (2.5 equiv) and propargyl bromide (1 equiv) were added. The reaction mixture was stirred at 25 °C for 12 h under nitrogen, then was diluted with water and extracted with EtOAc (x2). The combined organic layers were washed with brine (x1), dried over anhydrous sodium sulfate and concentrated *in vacuo* to obtain the corresponding products (Scheme S1).

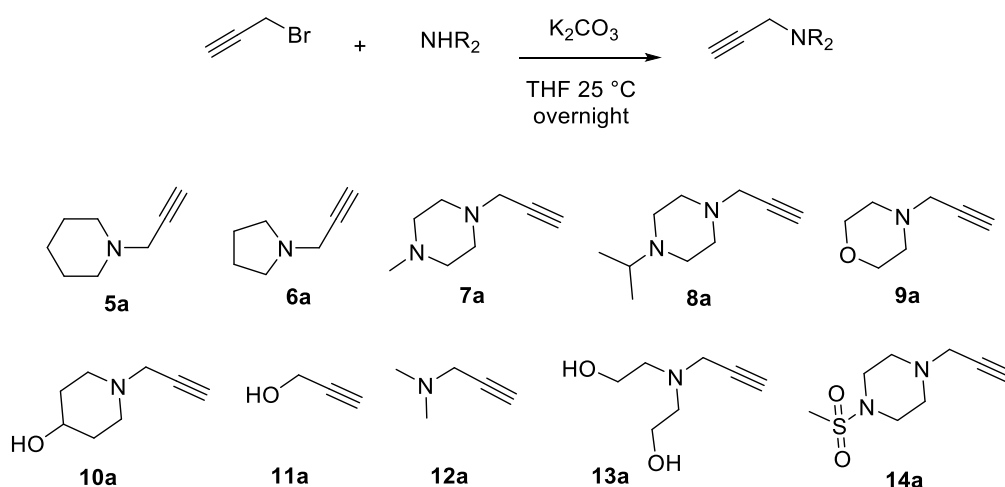

**Scheme S1.** General procedure for the synthesis of alkynes **5a-14a**.

### 1-(prop-2-yn-1-yl)piperidine (**5a**)

The title compound was prepared from piperidine according to general procedure A and was used in the next step without further purification. Light brown oil: yield 68%; **IR** (KBr) 3114, 1671, 1608, 1392, 1370, 1276, 1245, 1134, 1075, 847, 584  $cm^{-1}$ ;  **$^1H$ -NMR** (300 MHz,  $CDCl_3$ )  $\delta$  3.21 (d,  $J$  = 1.83 Hz, 2-H) 2.46 (t,  $J$  = 4.9 Hz, 4-H), 2.19 (t,  $J$  = 1.8 Hz, 1-H), 1.58 (quint,  $J$  = 5.5, 4-H), 1.39 (quint,  $J$  = 4.9 Hz, 2-H) ppm;  **$^{13}C$ -NMR** (75 MHz,  $CDCl_3$ )  $\delta$  79.4, 72.9, 53.2, 47.7, 26.0, 24.0 ppm. The spectral data were consistent with those reported previously [1].

### 1-(prop-2-yn-1-yl)pyrrolidine (**6a**)

The title compound was prepared from pyrrolidine according to general procedure A and was used in the next step without further purification. Light brown oil: yield 26%; **IR** (KBr) 3302, 3200, 2968, 2791, 1661, 1432, 1127, 651  $cm^{-1}$ ;  **$^1H$ -NMR** (300 MHz,  $CDCl_3$ )  $\delta$  3.32 (d,  $J$  = 2.5 Hz, 2-H), 2.54-2.50 (m, 4-H), 2.13 (t,  $J$  = 2.5, Hz, 1-H), 1.73-1.70 (m, 4-H) ppm;  **$^{13}C$ -NMR** (75 MHz,  $CDCl_3$ )  $\delta$  79.5, 72.2, 52.3, 42.8, 23.7 ppm. The spectral data were consistent with those reported previously [1].

### methyl-4-(prop-2-yn-1-yl)piperazine (**7a**)

The title compound was prepared from *N*-methylpiperazine according to general procedure A and was used in the next step without further purification. Yellow oil: yield 53%; **IR** (KBr) 3292, 3187, 2936, 2797, 1674, 1456, 1283, 1163, 1013, 819  $cm^{-1}$ ;  **$^1H$ -NMR** (300 MHz,  $CDCl_3$ )  $\delta$  3.24 (d,  $J$  = 2.5

Hz, 2-H), 2.56 (br s, 4-H), 2.43 (br s, 4-H), 2.23 (br s, 3-H), 2.19 (t,  $J = 2.5$  Hz, 1-H) ppm;  $^{13}\text{C-NMR}$  (75 MHz,  $\text{CDCl}_3$ )  $\delta$  78.6, 73.1, 54.8, 51.7, 46.7, 45.9 ppm. The spectral data were consistent with those reported previously [1].

#### **1-isopropyl-4-(prop-2-yn-1-yl)piperazine (8a)**

The title compound was prepared from *N*-isopropylpiperazine according to general procedure A and was used in the next step without further purification. Yellow oil: yield 87%; **IR** (KBr) 3306, 3207, 2965, 2813, 1672, 1611, 1453, 1332, 1178, 1012  $\text{cm}^{-1}$ ;  $^1\text{H-NMR}$  (300 MHz,  $\text{CDCl}_3$ )  $\delta$  3.08 (br s, 2-H), 2.40 (br s, 9-H), 2.07 (s, 1-H), 0.84 (br s, 6-H) ppm;  $^{13}\text{C-NMR}$  (75 MHz,  $\text{CDCl}_3$ )  $\delta$  78.7, 72.9, 54.1, 52.1, 48.2, 46.6, 18.4 ppm.

#### **4-(prop-2-yn-1-yl)morpholine (9a)**

The title compound was prepared from morpholine according to general procedure A and was used in the next step without further purification. Yellow oil: yield 42%; **IR** (KBr) 3289, 2962, 2857, 1677, 1453, 1290, 1116, 1006, 861  $\text{cm}^{-1}$ ;  $^1\text{H-NMR}$  (300 MHz,  $\text{CDCl}_3$ )  $\delta$  3.66-3.61 (m, 4-H), 3.21-3.15 (m, 2-H), 2.49-2.44 (m, 4-H), 2.19 (d,  $J = 1.8$  Hz, 1-H) ppm;  $^{13}\text{C-NMR}$  (75 MHz,  $\text{CDCl}_3$ )  $\delta$  78.4, 73.4, 66.7, 52.1, 47.1 ppm. The spectral data were consistent with those reported previously [1].

#### **1-(prop-2-yn-1-yl)piperidin-4-ol (10a)**

The title compound was prepared from 4-hydroxypiperidine according to general procedure A and was used in the next step without further purification. Yellow solid: yield 89%; mp 103-104  $^{\circ}\text{C}$ ; **IR** (KBr) 3197, 2942, 2794, 2113, 1450, 1329, 1070, 1022, 783  $\text{cm}^{-1}$ ;  $^1\text{H-NMR}$  (300 MHz,  $\text{CDCl}_3$ )  $\delta$  3.62-3.58 (m, 1-H), 3.24 (d,  $J = 2.5$  Hz, 2-H), 2.88 (br s, 1-H), 2.76-2.72 (m, 2-H), 2.33-2.26 (m, 2-H), 2.21 (t,  $J = 2.5$  Hz, 1-H), 1.88-1.84 (m, 2-H), 1.61-1.57 (m, 2-H) ppm;  $^{13}\text{C-NMR}$  (75 MHz,  $\text{CDCl}_3$ )  $\delta$  78.8, 73.3, 67.2, 49.9, 46.9, 34.3 ppm. The spectral data were consistent with those reported previously [2].

**propargyl alcohol (11a)** and **1-dimethylamino-2-propyne (12a)** were commercially available.

#### **2,2'-(prop-2-yn-1-ylazanediyl)bis(ethan-1-ol) (13a)**

The compound was prepared as described previously [3].

#### **1-(methylsulfonyl)-4-(prop-2-yn-1-yl)piperazine (14a)**

The title compound was prepared from 1-methylsulfonyl-piperazine according to general procedure A and the crude was purified by column chromatography using EtOAc/MeOH 9:1 + 1% conc.  $\text{NH}_4\text{OH}$  as eluant. Yellow oil: yield 42%; **IR** (KBr) 3289, 2962, 2857, 1677, 1453, 1290, 1116, 1006, 861  $\text{cm}^{-1}$ ;  $^1\text{H-NMR}$  (300 MHz,  $\text{CDCl}_3$ )  $\delta$  3.66-3.61 (m, 4-H), 3.21-3.15 (m, 2-H), 2.49-2.44 (m, 4-H), 2.19 (d,  $J = 1.8$  Hz, 1-H) ppm;  $^{13}\text{C-NMR}$  (75 MHz,  $\text{CDCl}_3$ )  $\delta$  78.4, 73.4, 66.7, 52.1, 47.1 ppm.

#### *General procedure B for the synthesis of alkynes 5b-11b (series b)*

To a solution of the corresponding secondary amine (2 equiv) in dry THF (1.5 M),  $\text{K}_2\text{CO}_3$  (2.5 equiv) and 4-bromo-1-butyne (1 equiv) were added. The reaction mixture was stirred at reflux overnight under nitrogen, then was diluted with water and extracted with EtOAc (x3). The combined organic



layers were washed with brine (x1), dried over anhydrous sodium sulfate and concentrated *in vacuo* to obtain the corresponding products (Scheme S2).

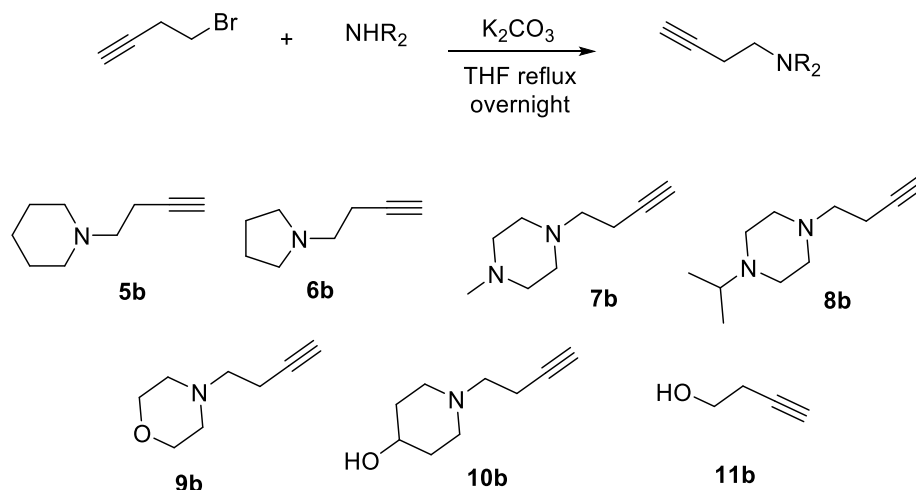

**Scheme S2.** General procedure for the synthesis of alkynes **5b-11b**.

#### 1-(but-3-yn-1-yl)piperidine (**5b**)

The title compound was prepared from piperidine according to general procedure B and was used in the next step without further purification. Orange oil: yield 51%; <sup>1</sup>H-NMR (300 MHz, CDCl<sub>3</sub>)  $\delta$  2.53 (td,  $J$ =8.0/2.1 Hz, 2-H), 2.37-2.32 (m, 6-H), 1.93 (t,  $J$ =2.5 Hz, 1-H), 1.60-1.48 (m, 4-H), 1.40-1.38 (m, 2-H) ppm; <sup>13</sup>C-NMR (75 MHz, CDCl<sub>3</sub>)  $\delta$  82.6, 68.7, 57.6, 53.9, 25.6, 24.0, 16.4 ppm. The spectral data were consistent with those reported previously [4].

#### 1-(but-3-yn-1-yl)pyrrolidine (**6b**)

The title compound was prepared from pyrrolidine according to general procedure B and was used in the next step without further purification. Yellow oil: yield 20%; <sup>1</sup>H-NMR (300 MHz, CDCl<sub>3</sub>)  $\delta$  2.63 (td,  $J$ =7.6/2.2 Hz, 2-H), 2.50 (br s, 4-H), 2.40-2.36 (m, 2-H), 1.95 (t,  $J$ =2.6 Hz, 1-H), 1.77-1.74 (m, 4-H) ppm; <sup>13</sup>C-NMR (75 MHz, CDCl<sub>3</sub>)  $\delta$  82.3, 68.6, 54.6, 53.6, 23.1, 18.4 ppm. The spectral data were consistent with those reported previously [4].

#### 1-(but-3-yn-1-yl)-4-methylpiperazine (**7b**)

The title compound was prepared from *N*-methylpiperazine according to general procedure B and the crude was purified by column chromatography using EtOAc/CH<sub>3</sub>OH 5:5 as eluant. Yellow oil: yield 34%; <sup>1</sup>H-NMR (300 MHz, CDCl<sub>3</sub>)  $\delta$  2.34-2.06 (m, 12-H), 2.00 (br s, 3-H), 1.75 (t,  $J$ =2.5 Hz, 1-H) ppm; <sup>13</sup>C-NMR (75 MHz, CDCl<sub>3</sub>)  $\delta$  82.8, 68.9, 56.5, 54.5, 52.3, 45.6, 16.3 ppm. The spectral data were consistent with those reported previously [4].

#### 1-(but-3-yn-1-yl)-4-isopropylpiperazine (**8b**)

The title compound was prepared from *N*-isopropylpiperazine according to general procedure B and the crude was purified by column chromatography using EtOAc/CH<sub>3</sub>OH 95:5 as eluant. Yellow oil: yield 60%; <sup>1</sup>H-NMR (300 MHz, CDCl<sub>3</sub>)  $\delta$  2.49-2.35 (m, 11-H), 2.18 (td,  $J$ =6.4/1.8 Hz, 2-H), 1.81

(t,  $J = 2.5$  Hz, 1-H), 0.85 (dd,  $J = 6.4/2.2$  Hz, 6-H) ppm;  $^{13}\text{C-NMR}$  (75 MHz,  $\text{CDCl}_3$ )  $\delta$  82.4, 68.9, 56.8, 54.1, 52.9, 48.3, 18.4, 16.4 ppm.

#### 4-(but-3-yn-1-yl)morpholine (9b)

The title compound was prepared from morpholine according to general procedure B and was used in the next step without further purification. Yellow oil; yield 58%; **IR** (neat) 3291, 2951, 2855, 2811, 2118, 1458, 1277, 1138, 1114, 1070, 1006, 866, 632,  $\text{cm}^{-1}$ ;  $^1\text{H-NMR}$  (300 MHz,  $\text{CDCl}_3$ )  $\delta$  3.57-3.56 (m, 4-H), 2.46-2.24 (m, 8-H), 1.88 (s, 1-H) ppm;  $^{13}\text{C-NMR}$  (75 MHz,  $\text{CDCl}_3$ )  $\delta$  82.4, 69.1, 66.7, 57.2, 53.3, 16.5 ppm. The spectral data were consistent with those reported previously [4].

#### 1-(but-3-yn-1-yl)piperidin-4-ol (10b)

The title compound was prepared from 4-hydroxypiperidine according to general procedure B and was extracted with EtOAc (x5). It was used in the next step without further purification. Yellow oil; yield 18%; **IR** (neat) 3290, 2939, 2815, 2117, 1454, 1366, 1283, 1115, 1067, 632,  $\text{cm}^{-1}$ ;  $^1\text{H-NMR}$  (300 MHz,  $\text{CDCl}_3$ )  $\delta$  3.69-3.63 (m, 1-H), 2.79-2.76 (m, 2-H), 2.60-2.33 (m, 5-H), 2.22-2.15 (m, 2-H), 1.97 (s, 1-H), 1.89-1.85 (m, 2-H), 1.61-1.55 (m, 2-H) ppm;  $^{13}\text{C-NMR}$  (75 MHz,  $\text{CDCl}_3$ )  $\delta$  83.1, 69.2, 67.7, 57.0, 50.9, 34.4, 17.0 ppm.

**3-butyn-1-ol (11b)** was commercially available.

#### General procedure C for the synthesis of alkynes **5c-11c** (series c)

A stirred mixture of pent-4-yn-1-yl 4-methylbenzenesulfonate (1.2 equiv) prepared as described previously [5].  $\text{K}_2\text{CO}_3$  (2 equiv) and the corresponding secondary amine (1 equiv) in DMF (0.5 M) was heated at 80 °C for 3 h under nitrogen. Then the reaction mixture was diluted with water and extracted with EtOAc (x3). The combined organic layers were washed with brine (x2), dried over anhydrous sodium sulfate and concentrated *in vacuo* to obtain the corresponding products (Scheme S3).

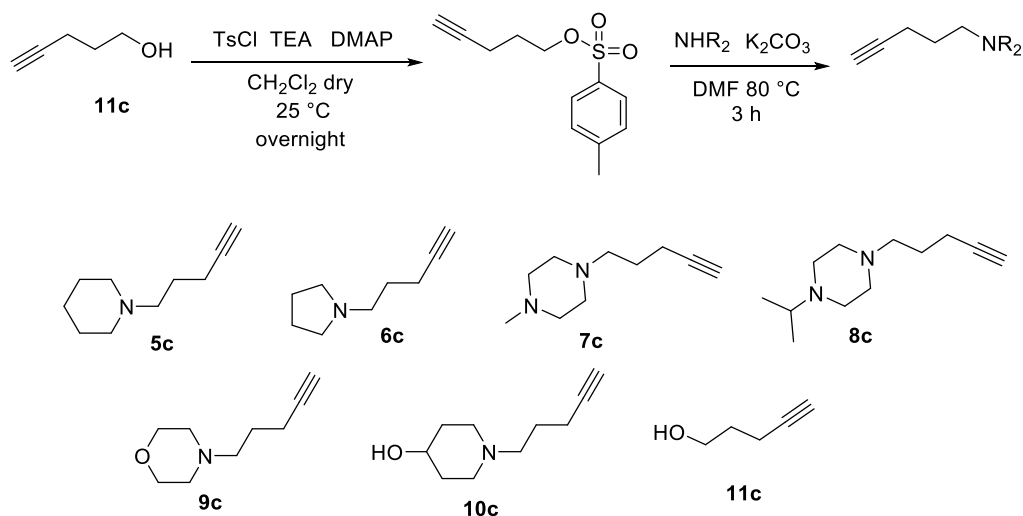

**Scheme S3.** General procedure for the synthesis of alkynes **5c-11c**.

### **1-(pent-4-yn-1-yl)piperidine (5c)**

The title compound was prepared from piperidine according to general procedure C and was used in the next step without further purification. Orange oil; yield 86%; <sup>1</sup>H-NMR (300 MHz, CDCl<sub>3</sub>) δ 2.25-2.21 (m, 6-H), 2.06 (td, *J* = 7.0/2.7 Hz, 2-H), 1.80 (t, *J* = 2.7 Hz, 1-H), 1.56 (quint, *J* = 7.3 Hz, 2-H), 1.47-1.41 (m, 4-H), 1.30-1.28 (m, 2-H) ppm; <sup>13</sup>C-NMR (75 MHz, CDCl<sub>3</sub>) δ 84.0, 68.2, 58.0, 54.4, 25.9, 25.7, 24.3, 16.4 ppm. The spectral data were consistent with those reported previously [6].

### **1-(pent-4-yn-1-yl)pyrrolidine (6c)**

The title compound was prepared from pyrrolidine according to general procedure C and was used in the next step without further purification. Brown oil; yield 74%; <sup>1</sup>H-NMR (300 MHz, CDCl<sub>3</sub>) δ 2.48-2.42 (m, 6-H), 2.17 (quint, *J* = 6.7 Hz, 2-H), 1.88 (t, *J* = 2.7 Hz, 1-H), 1.70-1.62 (m, 6-H) ppm; <sup>13</sup>C-NMR (75 MHz, CDCl<sub>3</sub>) δ 84.2, 68.4, 55.3, 54.1, 27.9, 23.4, 16.6 ppm. The spectral data were consistent with those reported previously [6].

### **1-methyl-4-(pent-4-yn-1-yl)piperazine (7c)**

The title compound was prepared from *N*-methylpiperazine according to general procedure C and was used in the next step without further purification. Orange oil; yield 68%; <sup>1</sup>H-NMR (300 MHz, CDCl<sub>3</sub>) δ 2.20-2.16 (m, 10-H), 2.04-1.95 (m, 5-H), 1.74 (t, *J* = 2.7 Hz, 1-H), 1.46 (quint, *J* = 7.3 Hz, 2-H) ppm; <sup>13</sup>C-NMR (75 MHz, CDCl<sub>3</sub>) δ 83.8, 68.2, 56.9, 54.8, 52.9, 45.8, 25.5, 16.1 ppm.

### **1-isopropyl-4-(pent-4-yn-1-yl)piperazine (8c)**

The title compound was prepared from *N*-isopropylpiperazine according to general procedure C and was used in the next step without further purification. Orange oil; yield 85%; <sup>1</sup>H-NMR (300 MHz, CDCl<sub>3</sub>) δ 2.39-2.09 (m, 11-H), 1.92 (td, *J* = 6.7/2.4 Hz, 2-H), 1.68 (t, *J* = 2.4 Hz, 1-H), 0.74 (br d, 6-H) ppm; <sup>13</sup>C-NMR (75 MHz, CDCl<sub>3</sub>) δ 83.6, 68.1, 56.9, 53.9, 53.1, 48.2, 25.3, 18.2, 15.9 ppm.

### **4-(pent-4-yn-1-yl)morpholine (9c)**

The title compound was prepared from morpholine according to general procedure C and was used in the next step without further purification. Orange oil; yield 60%; IR (neat) 3292, 2952, 2854, 2809, 2117, 1456, 1268, 1137, 1115, 1010, 866, 629 cm<sup>-1</sup>; <sup>1</sup>H-NMR (300 MHz, CDCl<sub>3</sub>) δ 3.64 (br s, 4-H), 2.38 (br d, 6-H), 2.21-2.17 (m, 2-H), 1.89 (s, 1-H), 1.65 (quint, *J* = 7.0 Hz, 2H) ppm; <sup>13</sup>C-NMR (75 MHz, CDCl<sub>3</sub>) δ 84.2, 68.5, 67.1, 57.7, 53.8, 25.6, 16.4 ppm.

### **1-(pent-4-yn-1-yl)piperidin-4-ol (10c)**

The title compound was prepared from 4-hydroxypiperidine according to general procedure C and was extracted with EtOAc (x5). The crude was purified by column chromatography using EtOAc/MeOH 8:2 as eluant. Yellow solid; yield 41%; mp 86-89 °C; IR (KBr) 3187, 2922, 2803, 2772, 1428, 1360, 1241, 1187, 1136, 1079, 746, 723, cm<sup>-1</sup>; <sup>1</sup>H-NMR (300 MHz, CDCl<sub>3</sub>) δ 3.63-3.58 (m, 1-H), 2.73-2.69 (m, 2-H), 2.36 (t, *J* = 7.1 Hz, 2-H), 2.18-2.04 (m, 4-H), 1.90 (s, 1-H), 1.84-1.80 (m, 2-H), 1.70-1.50 (m, 4-H) ppm; <sup>13</sup>C-NMR (75 MHz, CDCl<sub>3</sub>) δ 84.2, 68.6, 67.7, 57.3, 51.2, 34.4, 26.0, 16.5 ppm; MS (ESI) *m/z* 168 [M+H]<sup>+</sup>.

**4-pentyn-1-ol (11c)** was commercially available.

#### General procedure D for the synthesis of alkynes **5d-11d** (series d)

A stirred mixture of hex-5-yn-1-yl 4-methylbenzenesulfonate (1.2 equiv) prepared as described previously [5], K<sub>2</sub>CO<sub>3</sub> (2 equiv) and the corresponding secondary amine (1 equiv) in DMF (0.5 M) was heated at 80 °C for 3 h under nitrogen. Then the reaction mixture was diluted with water and extracted with EtOAc (x3). The combined organic layers were washed with brine (x2), dried over anhydrous sodium sulfate and concentrated *in vacuo* to obtain the corresponding products (Scheme S4).

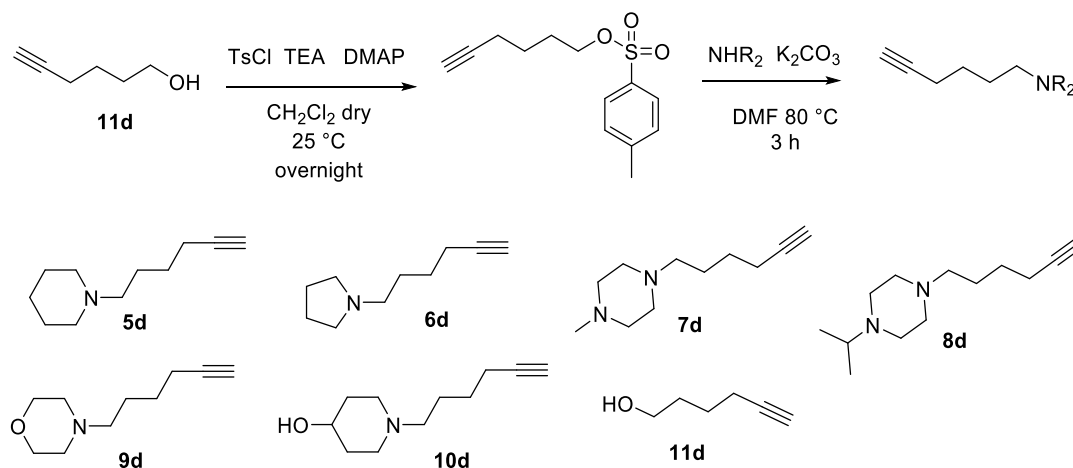

**Scheme S4.** General procedure for the synthesis of alkynes **5d-11d**.

#### 1-(hex-5-yn-1-yl)piperidine (**5d**)

The title compound was prepared from piperidine according to general procedure D and was used in the next step without further purification. Orange oil; quantitative yield; **IR** (neat) 3309, 2933, 2855, 2764, 2117, 1681, 1442, 1154, 1121, 1089, 624, cm<sup>-1</sup>; **<sup>1</sup>H-NMR** (300 MHz, CDCl<sub>3</sub>) δ 2.15-1.98 (m, 8-H), 1.76 (s, 1-H), 1.37-1.22 (m, 10-H) ppm; **<sup>13</sup>C-NMR** (75 MHz, CDCl<sub>3</sub>) δ 84.0, 68.2, 58.6, 54.3, 26.4, 25.7, 24.2, 18.1 ppm; **MS (ESI)** m/z 166 [M+H]<sup>+</sup>.

#### 1-(hex-5-yn-1-yl)pyrrolidine (**6d**)

The title compound was prepared from pyrrolidine according to general procedure D. Considering the volatility of the product, diethyl ether was used as the extraction solvent, which was evaporated under vacuum at a temperature not exceeding 40 °C. The compound was used in the next step without further purification. Yellow oil: quantitative yield; **IR** (neat) 3308, 2937, 2875, 2787, 2117, 1699, 1457, 1429, 1154, 1126, 624, 549, cm<sup>-1</sup>; **<sup>1</sup>H-NMR** (300 MHz, CDCl<sub>3</sub>) δ 2.30-2.23 (m, 6-H), 2.04 (br s, 2-H), 1.77 (s, 1-H), 1.59-1.58 (m, 2-H), 1.45-1.43 (m, 2-H) ppm; **<sup>13</sup>C-NMR** (75 MHz, CDCl<sub>3</sub>) δ 84.0, 68.3, 55.8, 54.0, 28.0, 26.5, 23.2, 18.2 ppm; **MS (ESI)** m/z 152 [M+H]<sup>+</sup>.

#### 1-(hex-5-yn-1-yl)-4-methylpiperazine (**7d**)

The title compound was prepared from *N*-methylpiperazine according to general procedure D. The crude was purified by column chromatography using EtOAc/MeOH 8:2 as eluant. Yellow oil: yield 35%; **IR** (neat) 3307, 2936, 2793, 1701, 1458, 1284, 1237, 1162, 1147, 1014, 626, cm<sup>-1</sup>; **<sup>1</sup>H-NMR** (300 MHz, CDCl<sub>3</sub>) δ 2.30 (br s, 6-H), 2.22-2.17 (m, 3-H), 2.14-2.05 (m, 6-H), 1.80 (br s, 1-H), 1.47-

1.37 (m, 4-H) ppm;  $^{13}\text{C-NMR}$  (75 MHz,  $\text{CDCl}_3$ )  $\delta$  84.1, 68.4, 57.9, 55.0, 53.1, 45.9, 26.3, 25.8, 18.2 ppm; **MS (ESI)**  $m/z$  181  $[\text{M}+\text{H}]^+$ .

#### **1-(hex-5-yn-1-yl)-4-isopropylpiperazine (8d)**

The title compound was prepared from *N*-isopropylpiperazine according to general procedure D and was purified by column chromatography using EtOAc/MeOH 7:3 as eluant. Yellow oil: yield: 62%; **IR** (neat) 3310, 2938, 2809, 2117, 1702, 1455, 1361, 1245, 1177, 1132, 983, 625,  $\text{cm}^{-1}$ ;  $^1\text{H-NMR}$  (300 MHz,  $\text{CDCl}_3$ )  $\delta$  2.52-2.40 (m, 9-H), 2.19-2.17 (m, 2-H), 2.08-2.06 (m, 2-H), 1.80 (s, 1-H), 1.42-1.39 (m, 4-H), 0.91-0.89 (m, 6-H) ppm;  $^{13}\text{C-NMR}$  (75 MHz,  $\text{CDCl}_3$ )  $\delta$  84.1, 68.3, 58.0, 54.3, 53.4, 48.5, 26.4, 25.8, 18.5, 18.2 ppm; **MS (ESI)**  $m/z$  209  $[\text{M}+\text{H}]^+$ .

#### **4-(hex-5-yn-1-yl)morpholine (9d)**

The title compound was prepared from morpholine according to general procedure D. Considering the volatility of the product, diethyl ether was used as the extraction solvent, which was evaporated under vacuum at a temperature not exceeding 40 °C. The compound was used in the next step without further purification. Yellow oil: quantitative yield; **IR** (neat) 3293, 2941, 2858, 2808, 2769, 1701, 1446, 1242, 1115, 865, 628,  $\text{cm}^{-1}$ ;  $^1\text{H-NMR}$  (300 MHz,  $\text{CDCl}_3$ )  $\delta$  3.45-3.36 (m, 4-H), 2.17-2.04 (m, 6-H), 1.96 (br s, 2-H), 1.75 (t,  $J = 2.4$  Hz, 1-H), 1.32 (br s, 4-H) ppm;  $^{13}\text{C-NMR}$  (75 MHz,  $\text{CDCl}_3$ )  $\delta$  83.8, 68.3, 66.4, 58.0, 53.3, 25.9, 25.1, 17.9 ppm; **MS (ESI)**  $m/z$  168  $[\text{M}+\text{H}]^+$ . The spectral data were consistent with those reported previously [7].

#### **1-(hex-5-yn-1-yl)piperidin-4-ol (10d)**

The title compound was prepared from 4-hydroxypiperidine according to general procedure D and was extracted with EtOAc (x5). The crude was purified by column chromatography using EtOAc/MeOH 8:2 as eluant. Yellow oil: yield 66%; **IR** (neat) 3299, 2939, 2863, 2810, 2772, 2115, 1453, 1366, 1242, 1065, 731, 626,  $\text{cm}^{-1}$ ;  $^1\text{H-NMR}$  (300 MHz,  $\text{CDCl}_3$ )  $\delta$  3.67-3.66 (m, 1-H), 2.77-2.75 (m, 2-H), 2.33-2.31 (m, 2-H), 2.19-2.12 (m, 4-H), 1.92-1.86 (m, 3-H), 1.59-1.52 (m, 6-H) ppm;  $^{13}\text{C-NMR}$  (75 MHz,  $\text{CDCl}_3$ )  $\delta$  83.9, 68.4, 66.9, 57.6, 50.9, 33.9, 26.2, 25.6, 18.0 ppm; **MS (ESI)**  $m/z$  182  $[\text{M}+\text{H}]^+$ .

**5-hexyn-1-ol (11d)** was commercially available.

***c-Myc G4***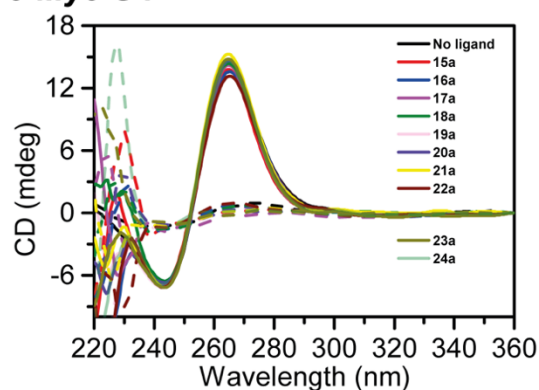**(a)**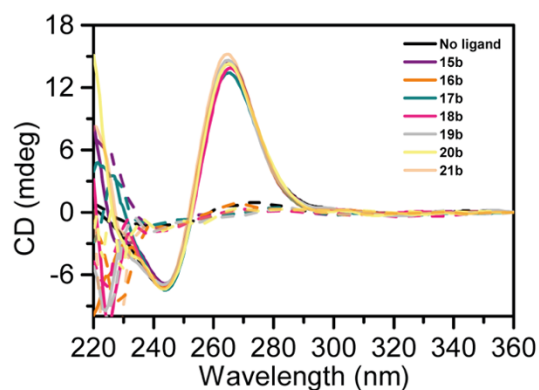**(b)**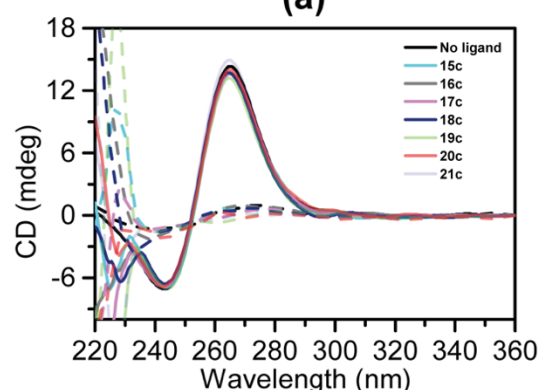**(c)**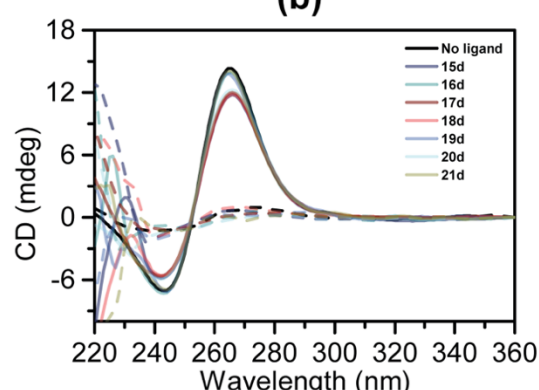**(d)*****c-Myc iM***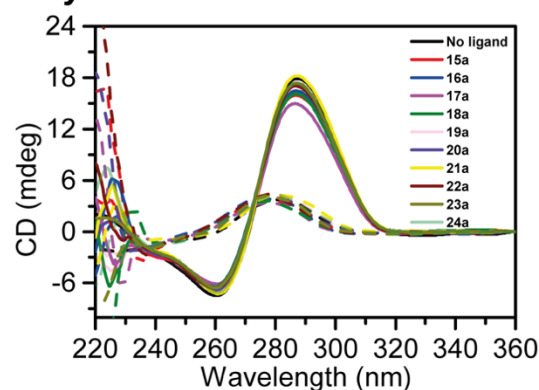**(a)**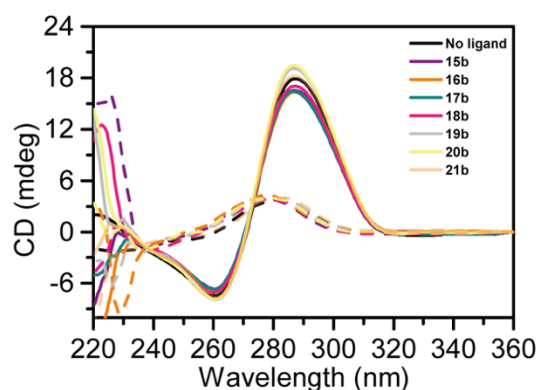**(b)**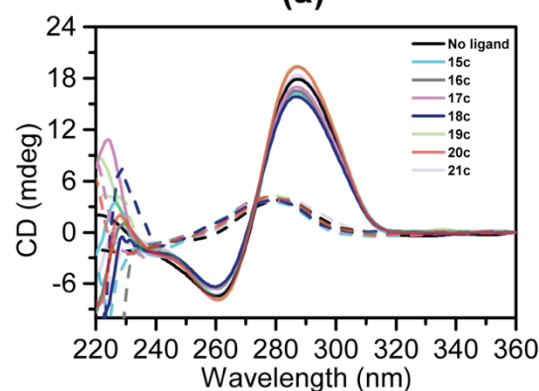**(c)**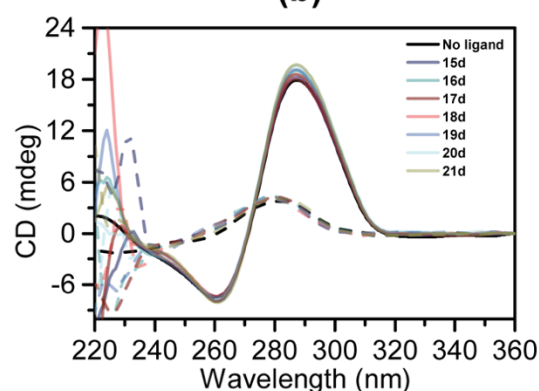**(d)**

**Figure S1.** CD spectra of *c-Myc G4* and *c-Myc iM* in the absence (black line) and presence of 10 equivalents of compounds from series a (**(a)**), b (**(b)**), c (**(c)**) and d (**(d)**). The spectra were acquired at 20 °C (solid lines) and 100 °C (dashed lines) for *c-Myc G4*, and at 5 °C (solid lines) and 90 °C (dashed lines) for *c-Myc iM*.

### ***Bcl-2 G4***

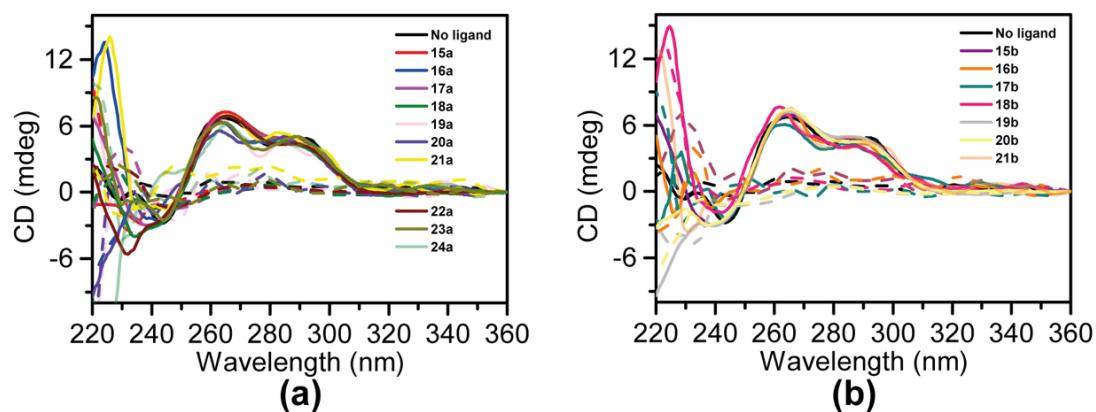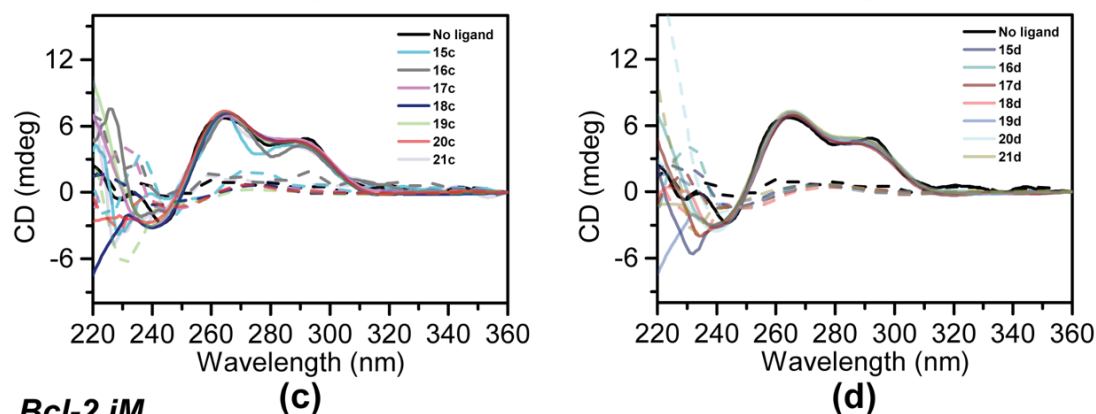

### ***Bcl-2 iM***

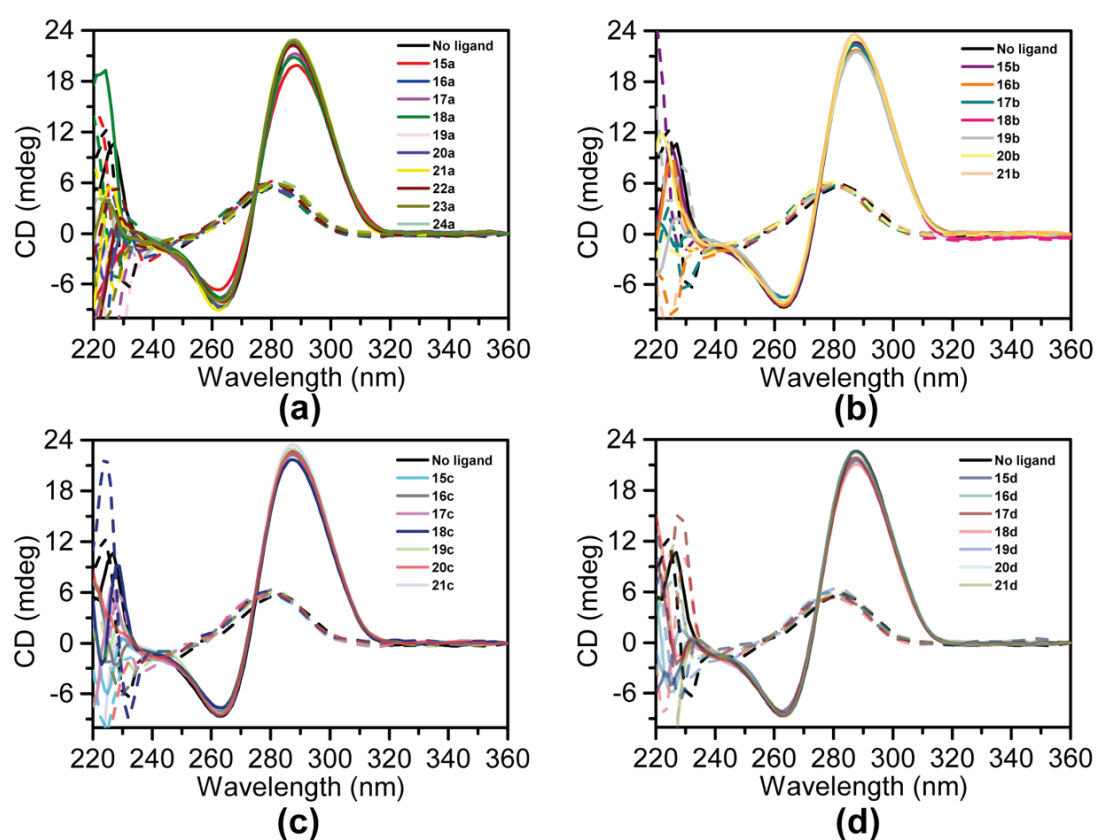

**Figure S2.** CD spectra of *Bcl-2 G4* and *Bcl-2 iM* in the absence (black line) and presence of 10 equivalents of compounds from series a (a), b (b), c (c) and d (d). The spectra were acquired at 20 °C (solid lines) and 100 °C (dashed lines) for *Bcl-2 G4*, and at 5° (solid lines) and 90 °C (dashed lines) for *Bcl-2 iM*.

**Tel<sub>23</sub> G4**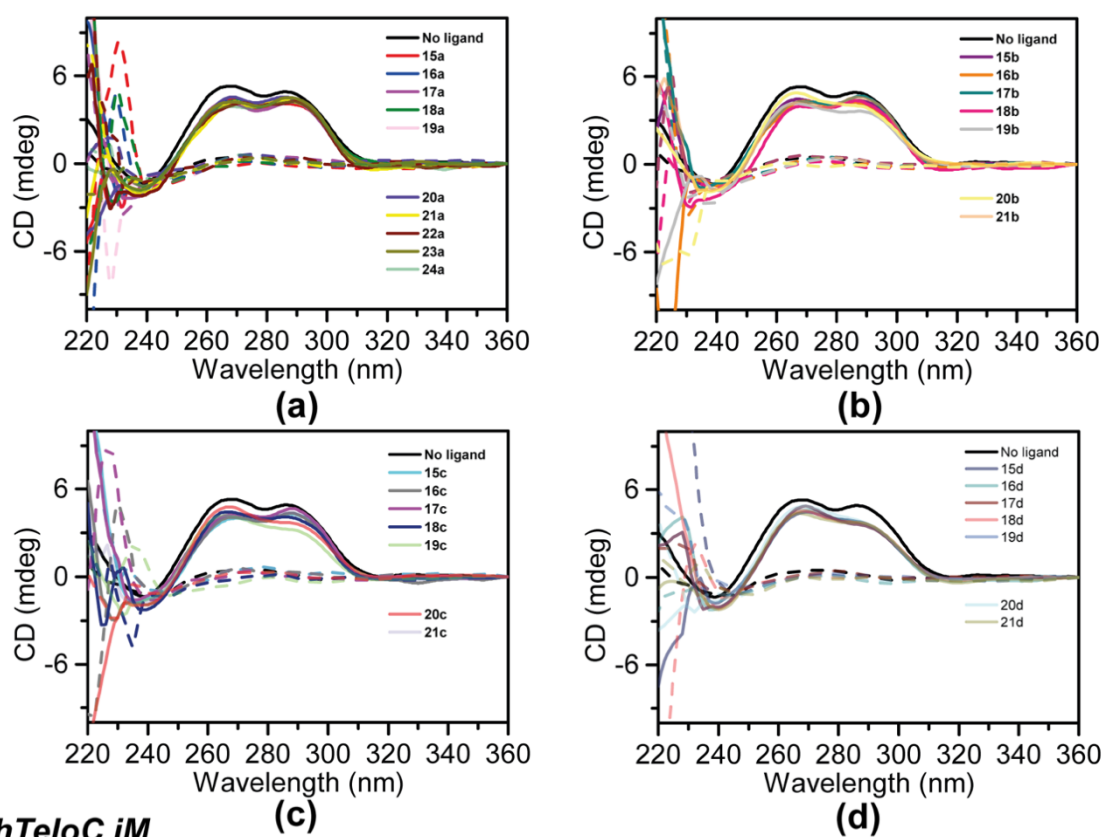**hTeloC iM**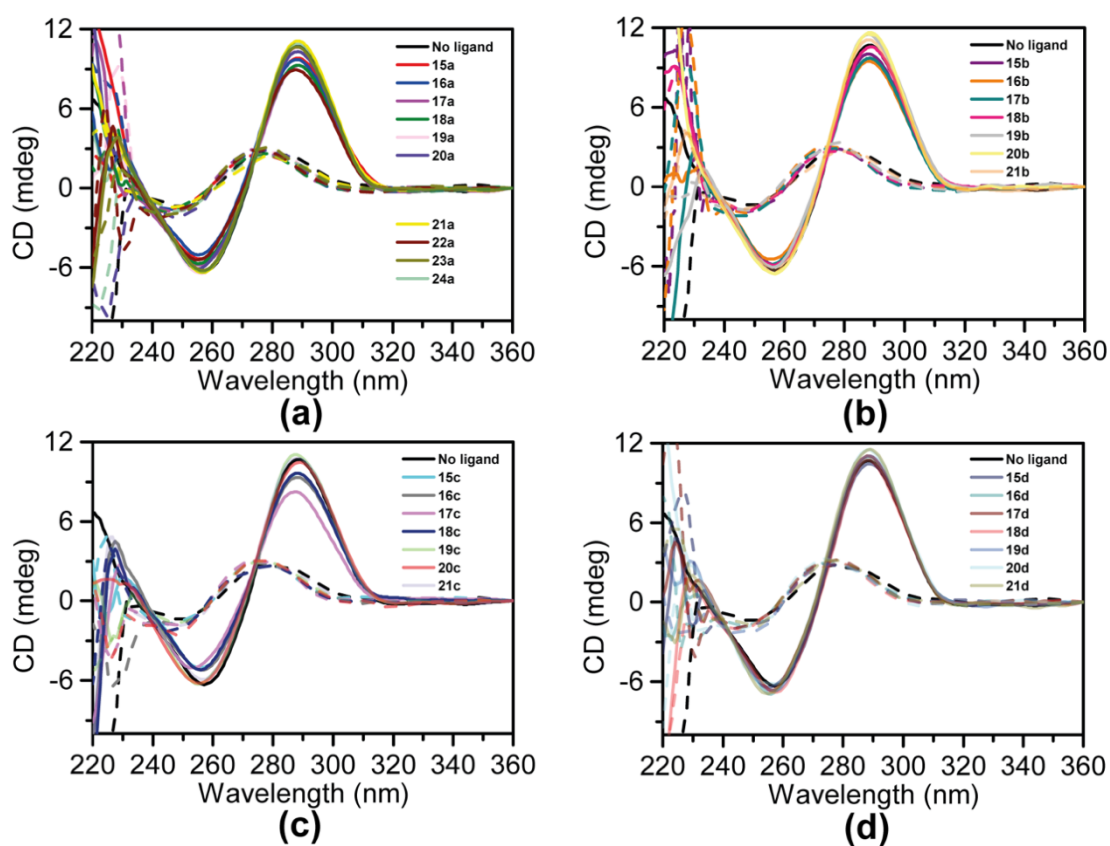

**Figure S3.** CD spectra of *Tel*<sub>23</sub> G4 and *hTeloC* iM in the absence (black line) and presence of 10 equivalents of compounds from series a (a), b (b), c (c) and d (d). The spectra were acquired at 20 °C (solid lines) and 100 °C (dashed lines) for *Tel*<sub>23</sub> G4, and at 5 °C (solid lines) and 90 °C (dashed lines) for *hTeloC* iM.



# *Hairpin*

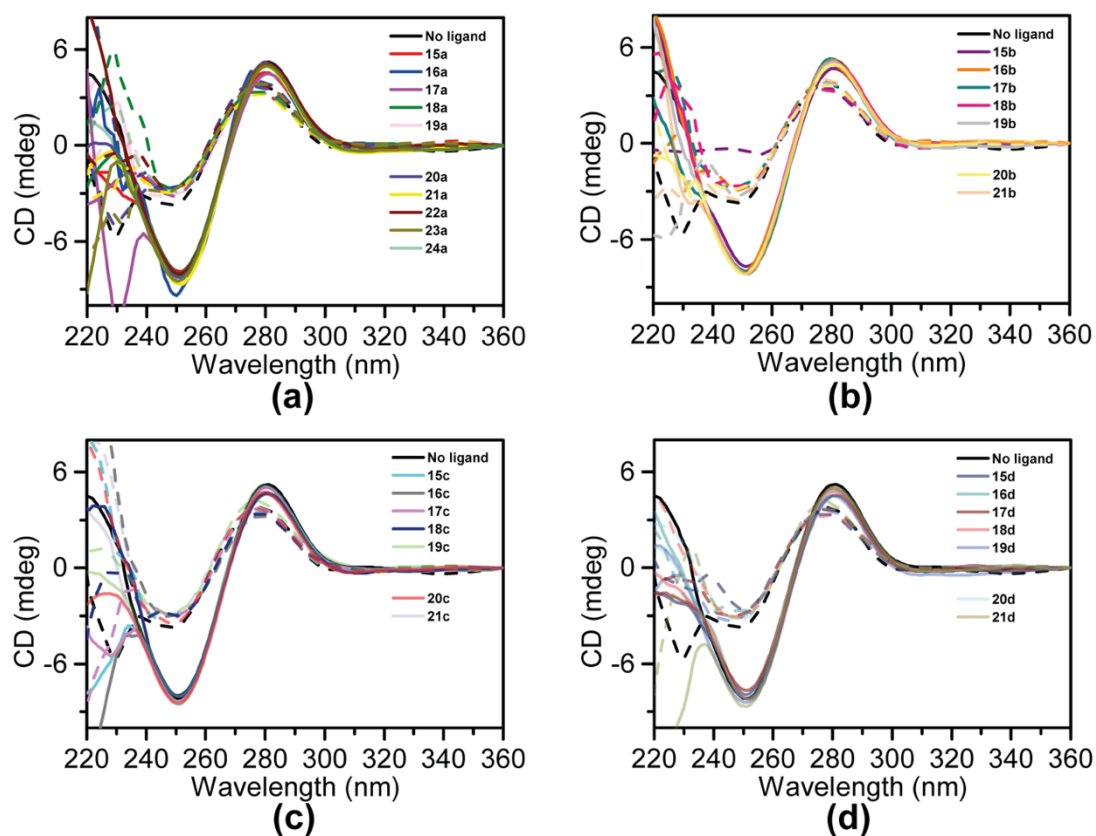

**Figure S4.** CD spectra of *Hairpin* in the absence (black line) and presence of 10 equivalents of compounds from series a (a), b (b), c (c) and d (d). The spectra were acquired at 20 °C (solid lines) and 100 °C (dashed lines).

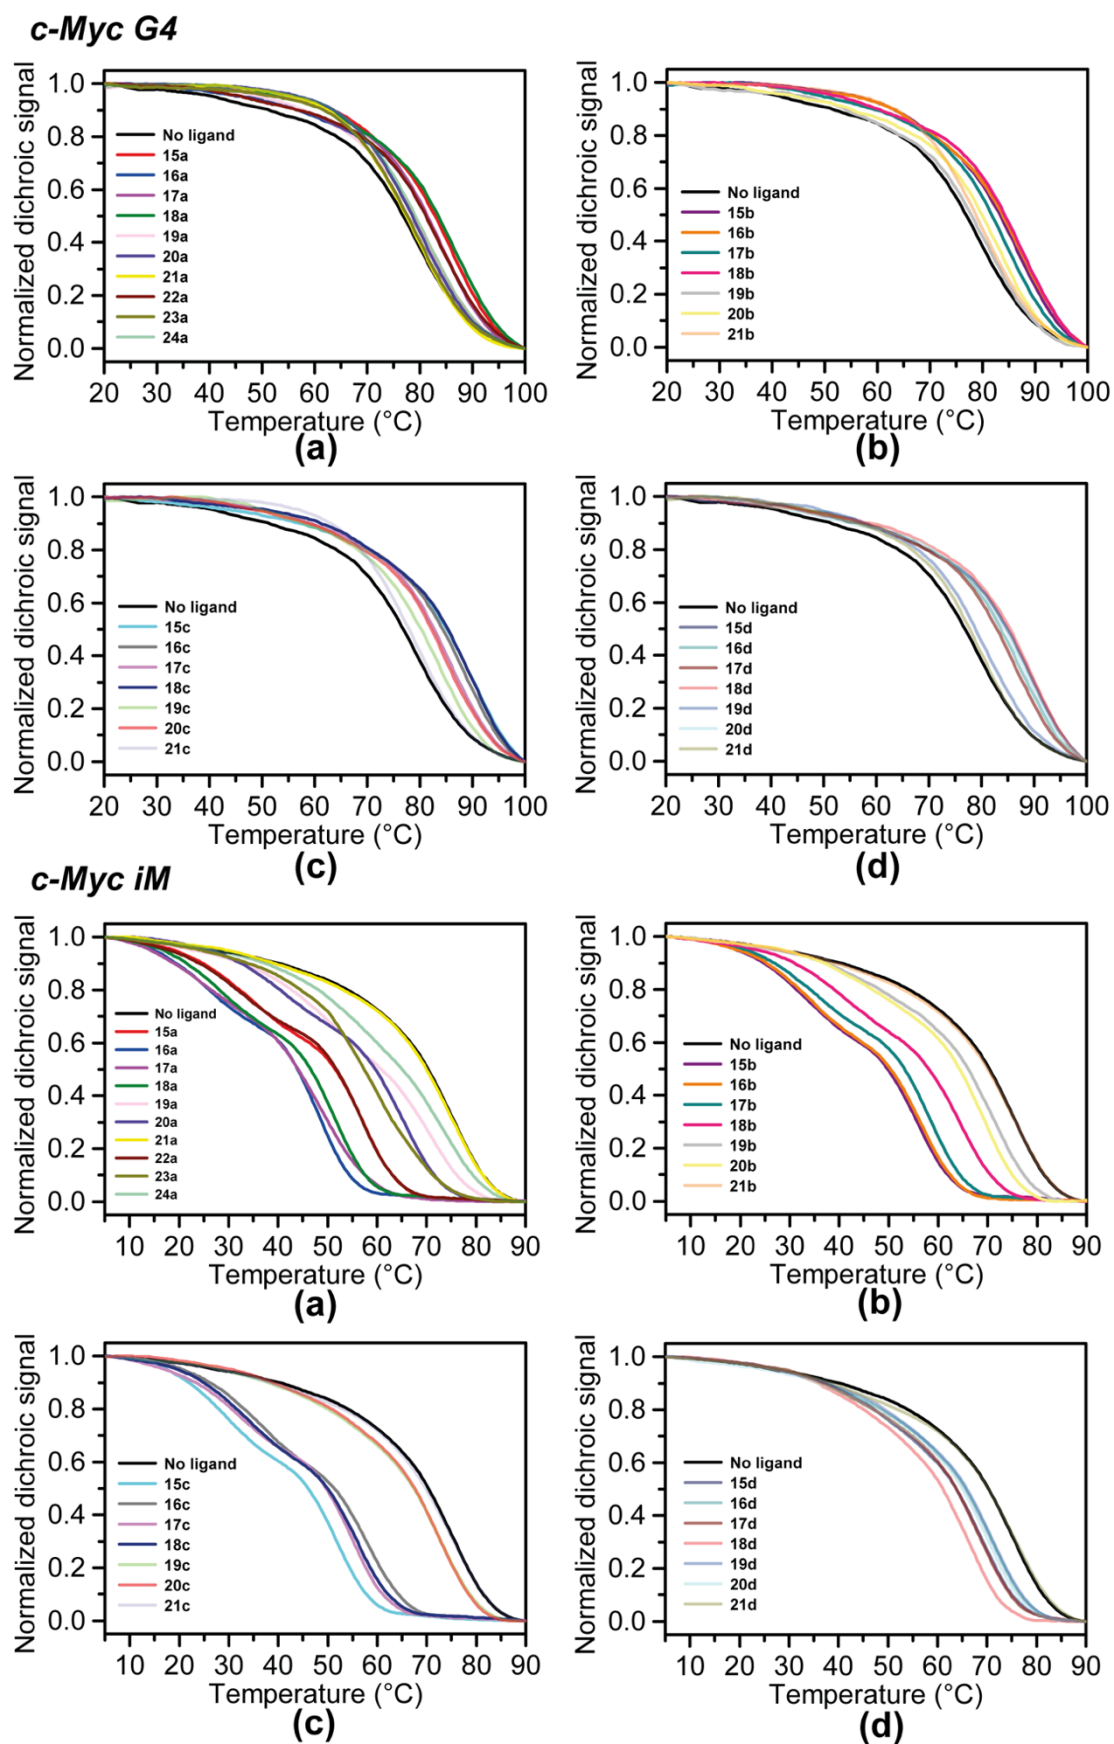

**Figure S5.** CD melting curves of *c-Myc G4* and *c-Myc iM* in the absence (black line) and presence of 10 equivalents of compounds from series a (a), b (b), c (c) and d (d).

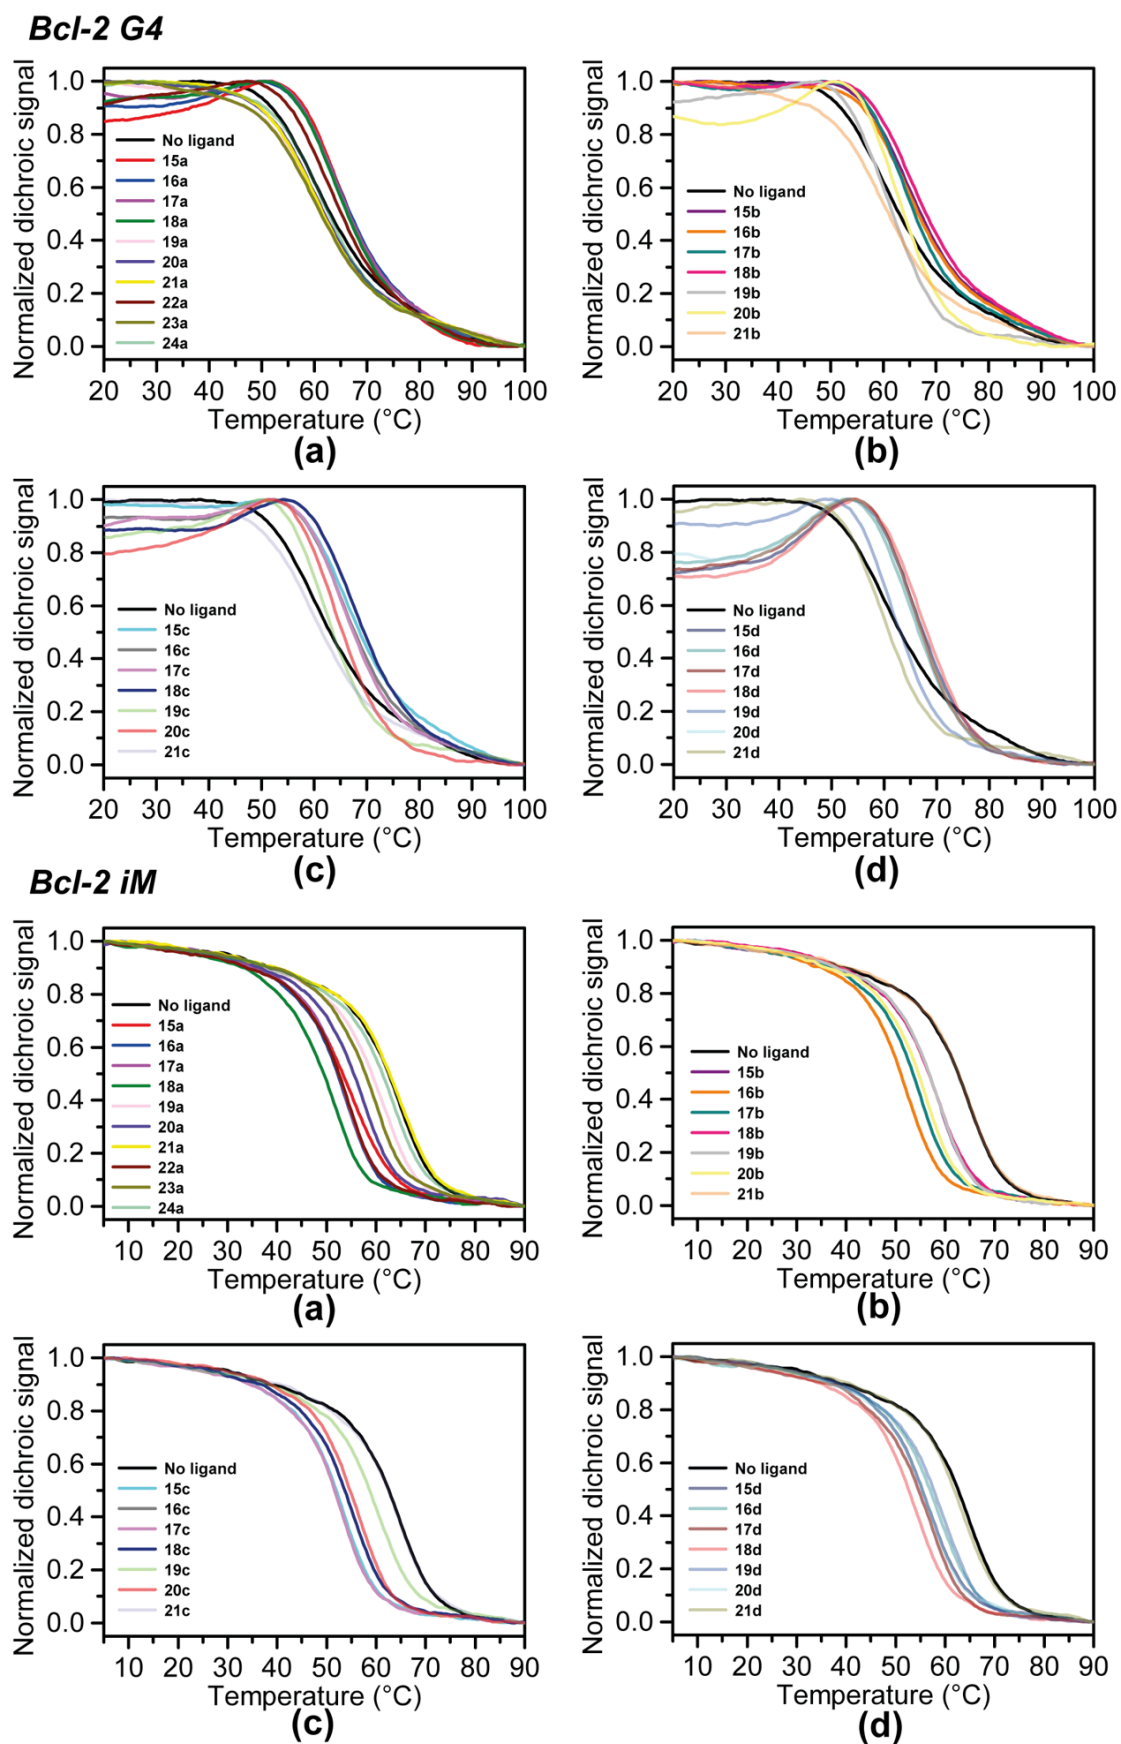

**Figure S6.** CD melting curves of *Bcl-2 G4* and *Bcl-2 iM* in the absence (black line) and presence of 10 equivalents of compounds from series a (**(a)**), a (**(b)**), c (**(c)**) and d (**(d)**).

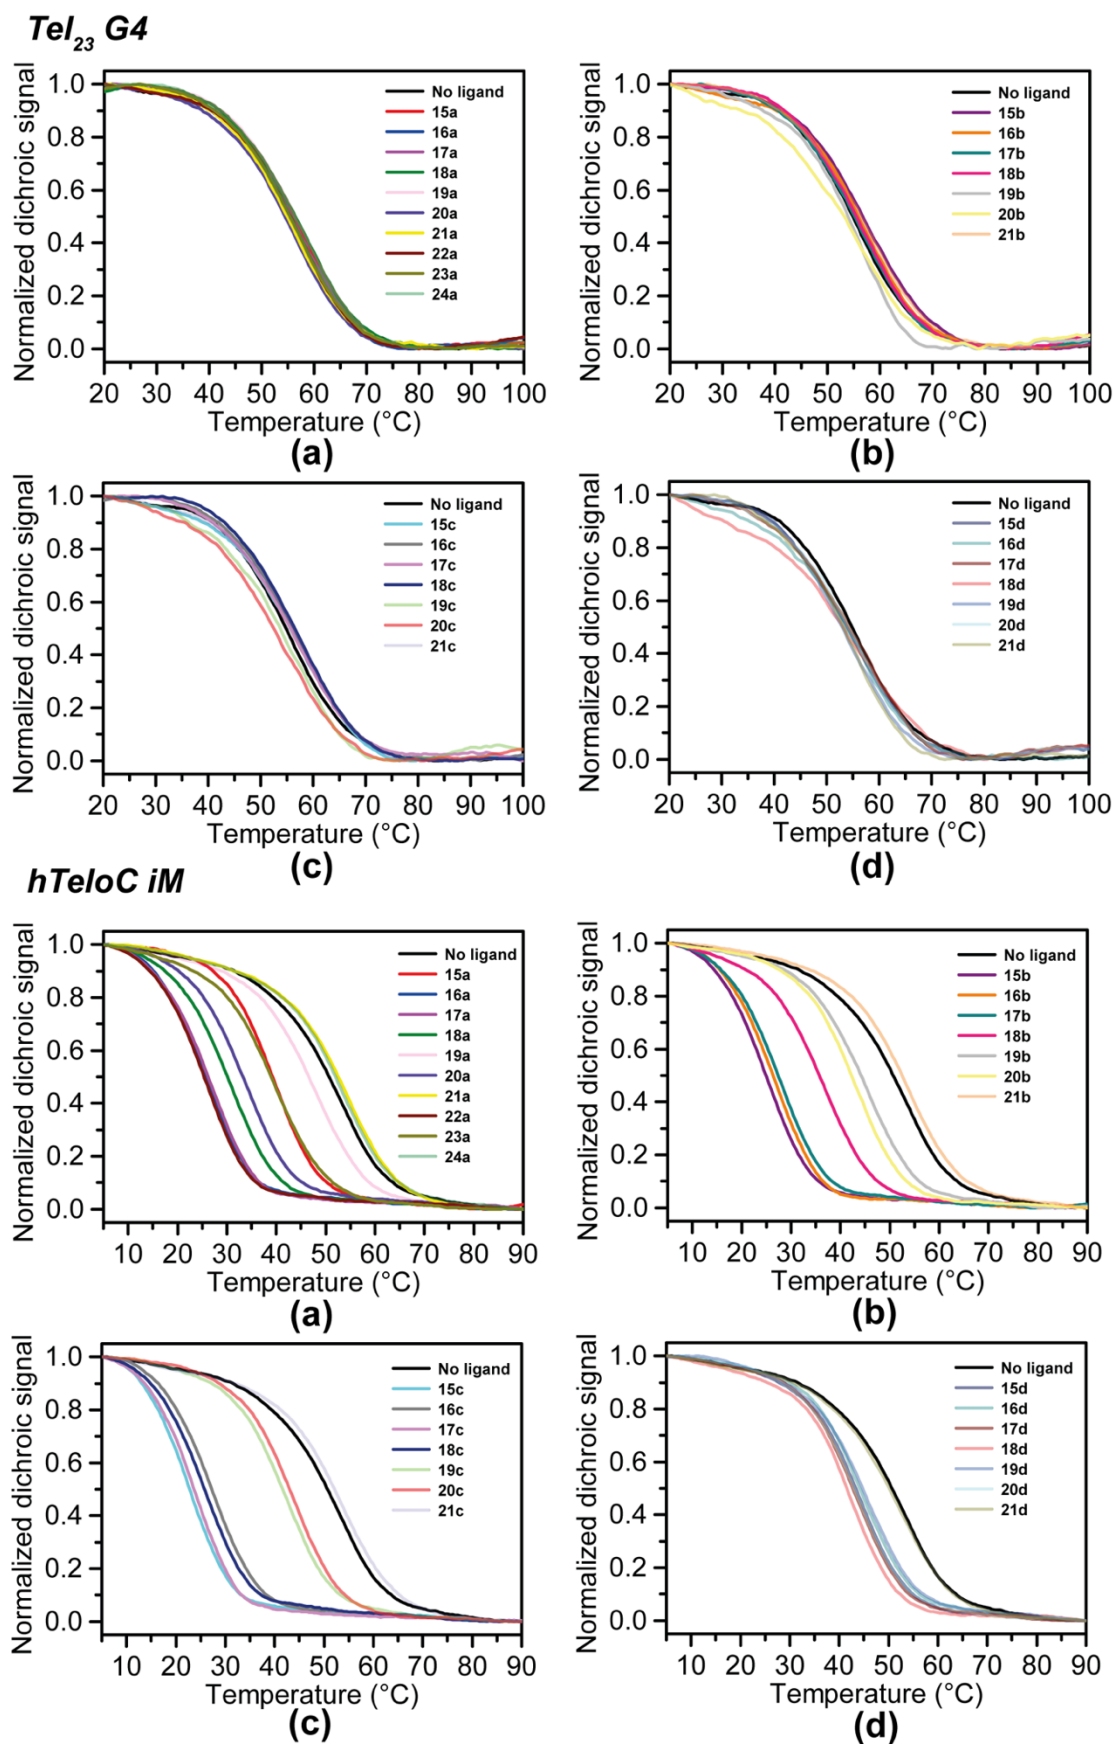

**Figure S7.** CD melting curves of *Tel*<sub>23</sub> G4 and *hTeloC iM* in the absence (black line) and presence of 10 equivalents of compounds from series a (a), b (b), c (c) and d (d).

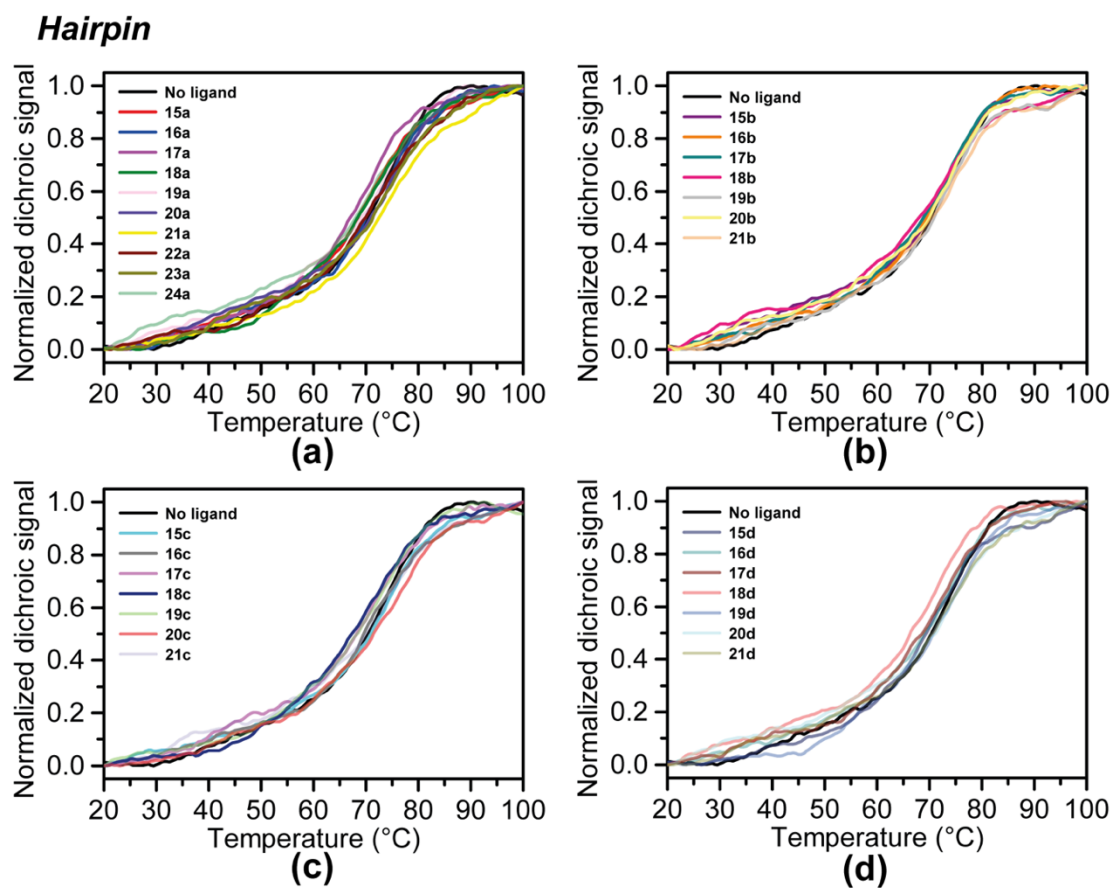

**Figure S8.** CD melting curves of *Hairpin* in the absence (black line) and presence of 10 equivalents of compounds from series a (a), b (b), c (c) and d (d).

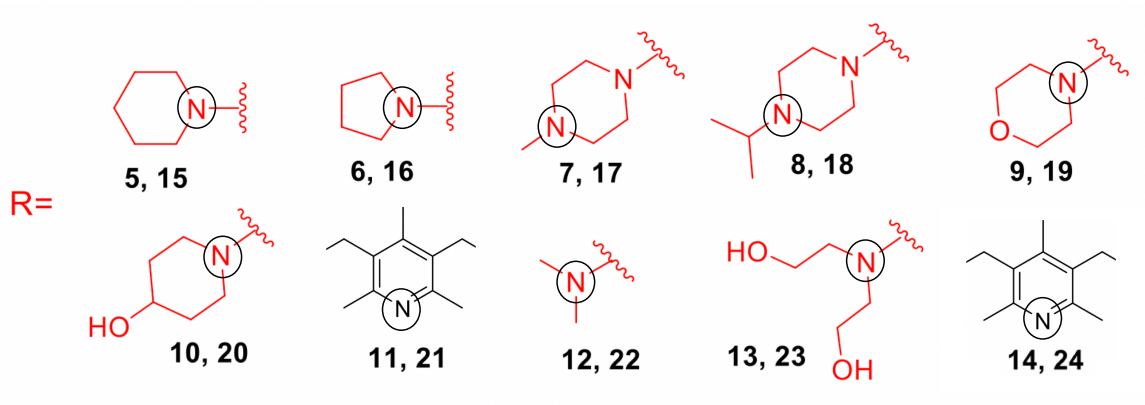

**Figure S9.** The strongest basic groups of the investigated compounds are circled in black. The  $pK_a$  values of their conjugated acids were used in the multivariate data analysis.

**Table S1.** pK<sub>a</sub> values of the conjugated acid of the strongest base (see Figure S9) of the investigated compounds, with the corresponding pK<sub>a</sub> interval.

| Compound | pK <sub>a</sub> value | pK <sub>a</sub> interval |
|----------|-----------------------|--------------------------|
| 15a      | 7.5                   | 7.1 – 8.0                |
| 16a      | 8.6                   | > 8.0                    |
| 17a      | 7.7                   | 7.1 – 8.0                |
| 18a      | 8.1                   | > 8.0                    |
| 19a      | 5.8                   | 5.1 – 6.0                |
| 20a      | 6.6                   | 6.1 – 7.0                |
| 21a      | 5.7                   | 5.1 – 6.0                |
| 22a      | 7.5                   | 7.1 – 8.0                |
| 23a      | 6.1                   | 6.1 – 7.0                |
| 24a      | 5.8                   | 5.1 – 6.0                |
| 15b      | 9.0                   | > 8.0                    |
| 16b      | 10.0                  | > 8.0                    |
| 17b      | 7.9                   | 7.1 – 8.0                |
| 18b      | 8.3                   | > 8.0                    |
| 19b      | 6.8                   | 6.1 – 7.0                |
| 20b      | 8.4                   | > 8.0                    |
| 21b      | 5.7                   | 5.1 – 6.0                |
| 15c      | 9.7                   | > 8.0                    |
| 16c      | 10.5                  | > 8.0                    |
| 17c      | 8.0                   | 7.1 – 8.0                |
| 18c      | 8.4                   | > 8.0                    |
| 19c      | 7.5                   | 7.1 – 8.0                |
| 20c      | 8.8                   | > 8.0                    |
| 21c      | 5.7                   | 5.1 – 6.0                |
| 15d      | 10.0                  | > 8.0                    |
| 16d      | 10.7                  | > 8.0                    |
| 17d      | 8.0                   | 7.1 – 8.0                |
| 18d      | 8.4                   | > 8.0                    |
| 19d      | 7.7                   | 7.1 – 8.0                |
| 20d      | 9.1                   | > 8.0                    |
| 21d      | 5.8                   | 5.1 – 6.0                |

**Table S2.** Differences in chemical shifts ( $\Delta\delta$ ) of selected signals of *c-Myc G4* upon addition (2 equiv) of **20a**, **23a**, **15c**, **18c**, and **21d** (G4 in the presence of compounds minus G4 alone).

| Signal | Proton            | $\delta$ (ppm) | $\Delta\delta$ (ppm) |                   |                   |                   |                   |
|--------|-------------------|----------------|----------------------|-------------------|-------------------|-------------------|-------------------|
|        |                   |                | 20a                  | 23a               | 15c               | 18c               | 21d               |
| 1      | G16 (H1)          | 11.672         | -0.02                | -0.02             | -0.04             | -0.06             | 0                 |
| 2      | G7 (H1)           | 11.549         | 0.01                 | 0.01              | 0                 | 0                 | 0                 |
| 3      | G11 (H1)          | 11.485         | 0                    | 0                 | 0                 | 0                 | 0                 |
| 4      | G12 (H1)          | 11.252         | 0                    | 0                 | -0.01             | -0.03             | 0                 |
| 5      | G21 (H1)          | 11.117         | 0                    | 0                 | -0.01             | -0.05             | 0                 |
| 6      | G20 (H1)          | 11.009         | N.D. <sup>1</sup>    | N.D. <sup>1</sup> | N.D. <sup>1</sup> | N.D. <sup>1</sup> | N.D. <sup>1</sup> |
| 7      | G8/G17 (H1)       | 10.919         | 0                    | 0                 | 0                 | -0.13             | 0                 |
| 8      | G13 (H1)          | 10.833         | 0.02                 | 0.02              | 0.02              | -0.02             | 0                 |
| 9      | G22 (H1)          | 10.808         | -0.01                | -0.01             | -0.01             | -0.03             | 0                 |
| 10     | G18 (H1)          | 10.794         | -0.02                | -0.02             | -0.02             | -0.01             | 0                 |
| 11     | G9 (H1)           | 10.384         | 0.02                 | 0.02              | -0.01             | -0.10             | 0                 |
| 12     | A15 (H8)          | 8.364          | 0.03                 | 0.03              | 0.04              | 0.05              | 0                 |
| 13     | A15 (H2)          | 8.234          | 0.06                 | 0.07              | 0.09              | 0.12              | 0.01              |
| 14     | G16 (H8)          | 7.894          | 0                    | 0                 | -0.01             | -0.03             | 0                 |
| 15     | G7 (H8)           | 7.875          | 0.03                 | 0.04              | 0.05              | 0.02              | 0                 |
| 16     | G5 (H8)           | 7.827          | 0.01                 | 0.01              | 0                 | -0.02             | 0                 |
| 17     | G11 (H8)          | 7.774          | 0.01                 | 0.01              | 0.01              | 0                 | 0                 |
| 18     | G12/G20 (H8)      | 7.684          | 0.01                 | 0.01              | 0                 | 0                 | 0                 |
| 19     | G21 (H8)          | 7.664          | 0.01                 | 0.01              | 0.01              | 0.01              | 0                 |
| 20     | G13 (H8)/T19 (H6) | 7.651          | N.D. <sup>1</sup>    | N.D. <sup>1</sup> | N.D. <sup>1</sup> | N.D. <sup>1</sup> | N.D. <sup>1</sup> |
| 21     | T10 (H6)          | 7.637          | 0                    | 0                 | 0                 | 0                 | 0                 |
| 22     | G17/G18 (H8)      | 7.632          | 0                    | 0                 | 0                 | 0                 | 0                 |
| 23     | A6 (H2)           | 7.615          | N.D. <sup>1</sup>    | N.D. <sup>1</sup> | N.D. <sup>1</sup> | N.D. <sup>1</sup> | N.D. <sup>1</sup> |
| 24     | A24 (H8)          | 7.580          | N.D. <sup>1</sup>    | N.D. <sup>1</sup> | -0.01             | -0.02             | 0                 |
| 25     | G9 (H8)           | 7.553          | 0                    | 0                 | -0.01             | -0.02             | 0                 |
| 26     | G8 (H8)           | 7.532          | 0                    | 0                 | -0.01             | -0.02             | 0                 |
| 27     | T14 (H6)          | 7.425          | 0.01                 | 0.01              | 0.01              | 0.01              | 0                 |
| 28     | A6 (H8)           | 7.418          | 0                    | 0                 | 0                 | 0.01              | 0                 |
| 29     | G22 (H8)          | 7.377          | -0.01                | -0.02             | -0.03             | -0.03             | 0                 |
| 30     | A25 (H8)          | 7.327          | 0.03                 | 0.02              | -0.01             | N.D. <sup>1</sup> | 0.01              |
| 31     | A25 (H2)          | 7.254          | 0.06                 | 0.06              | 0.05              | -0.01             | 0.01              |
| 32     | T4 (H6)           | 7.008          | 0.01                 | 0.01              | 0                 | -0.02             | N.D. <sup>1</sup> |
| 33     | T23 (H6)          | 6.961          | N.D. <sup>1</sup>    | N.D. <sup>1</sup> | N.D. <sup>1</sup> | N.D. <sup>1</sup> | N.D. <sup>1</sup> |
| 34     | A24 (H2)          | 6.906          | N.D. <sup>1</sup>    | N.D. <sup>1</sup> | N.D. <sup>1</sup> | N.D. <sup>1</sup> | N.D. <sup>1</sup> |

<sup>1</sup> N.D. = Not determined.



**Table S3.** Differences in chemical shifts ( $\Delta\delta$ ) of selected signals of *hTeloC iM* upon addition (2 equiv) of **20a**, **23a**, **15c**, **18c**, and **21d** (iM in the presence of compounds minus iM alone).

| Signal    | Proton                                    | $\delta$ (ppm) | $\Delta\delta$ (ppm) |                   |                   |                   |     |
|-----------|-------------------------------------------|----------------|----------------------|-------------------|-------------------|-------------------|-----|
|           |                                           |                | 20a                  | 23a               | 15c               | 18c               | 21d |
| <b>1</b>  | C7:C19 <sup>+</sup> /C8:C20 <sup>+</sup>  | 15.498         | 0                    | 0                 | 0                 | 0                 | 0   |
| <b>2</b>  | C3 <sup>+</sup> :C15/C2 <sup>+</sup> :C14 | 15.377         | 0                    | 0                 | 0                 | 0                 | 0   |
| <b>3</b>  | C9:C21 <sup>+</sup> /C1 <sup>+</sup> :C13 | 15.212         | 0                    | 0                 | 0                 | 0                 | 0   |
| <b>4</b>  | A6/A11/A12 (H8)                           | 8.209          | 0.02                 | 0.02              | 0.03              | 0.03              | 0   |
| <b>5</b>  | A6/A12 (H2)                               | 8.130          | 0.02                 | 0.02              | 0.02              | 0.02              | 0   |
| <b>6</b>  | A11 (H2)/A17 (H2, H8)                     | 7.974          | 0.04                 | 0.04              | 0.06              | 0.07              | 0   |
| <b>7</b>  | T22 (H6)                                  | 7.748          | N.D. <sup>1</sup>    | N.D. <sup>1</sup> | N.D. <sup>1</sup> | N.D. <sup>1</sup> | 0   |
| <b>8</b>  | A5 (H2)                                   | 7.738          | 0.03                 | 0.03              | 0.03              | 0.04              | 0   |
| <b>9</b>  | T10 (H6)                                  | 7.531          | 0                    | 0                 | 0                 | 0                 | 0   |
| <b>10</b> | A18 (H2)                                  | 7.408          | 0.02                 | 0.02              | 0.02              | 0.03              | 0   |
| <b>11</b> | A5 (H8)                                   | 7.398          | 0.01                 | 0.01              | 0.02              | 0.02              | 0   |
| <b>12</b> | T16 (H6)                                  | 7.354          | 0.01                 | 0.01              | 0.01              | 0.01              | 0   |
| <b>13</b> | A18 (H8)                                  | 7.206          | 0.01                 | 0.01              | 0.01              | 0.01              | 0   |

<sup>1</sup> N.D. = Not determined.

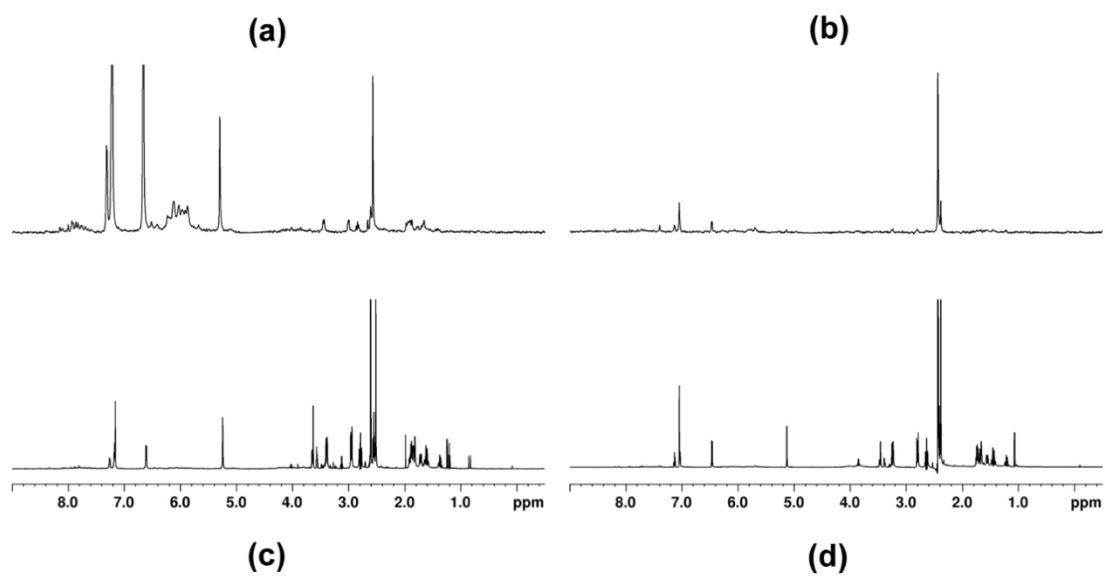

**Figure S10.** 1D  $^1\text{H}$  NMR spectra (**c** and **d**) and STD spectra (**a** and **b**) of compound **15c** (0.250 mM) in presence of *c-Myc G4* (**a** and **c**) and *hTeloC iM* (**b** and **d**).

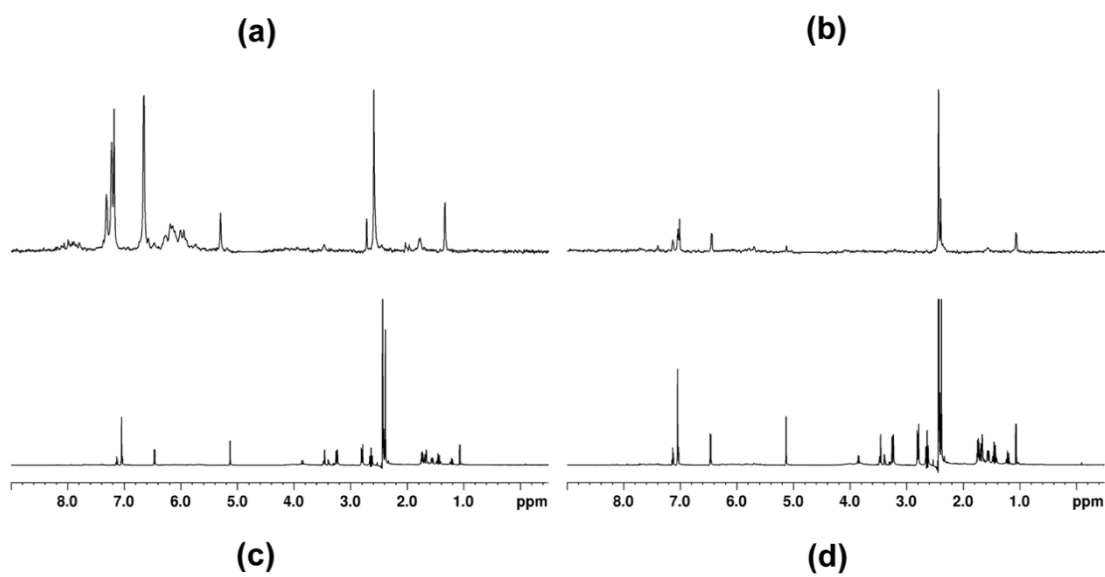

**Figure S11.** 1D  $^1\text{H}$  NMR spectra (**c** and **d**) and STD spectra (**a** and **b**) of compound **18c** (0.250 mM) in presence of *c-Myc G4* (**a** and **c**) and *hTeloC iM* (**b** and **d**).

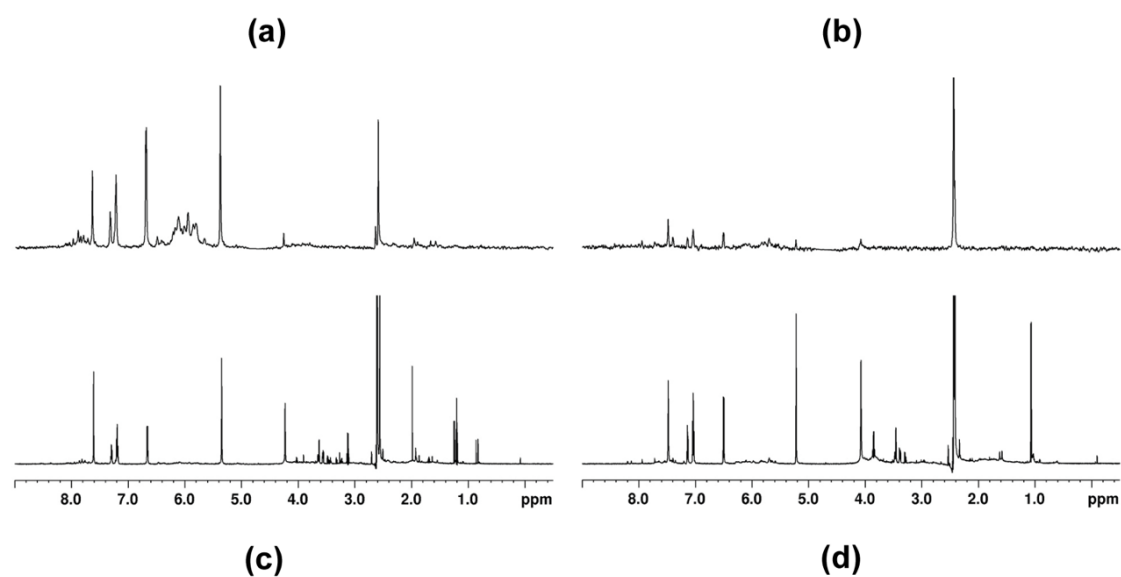

**Figure S12.** 1D  $^1\text{H}$  NMR spectra (**c** and **d**) and STD spectra (**a** and **b**) of compound **20a** (0.250 mM) in presence of *c-Myc G4* (**a** and **c**) and *hTeloC iM* (**b** and **d**).

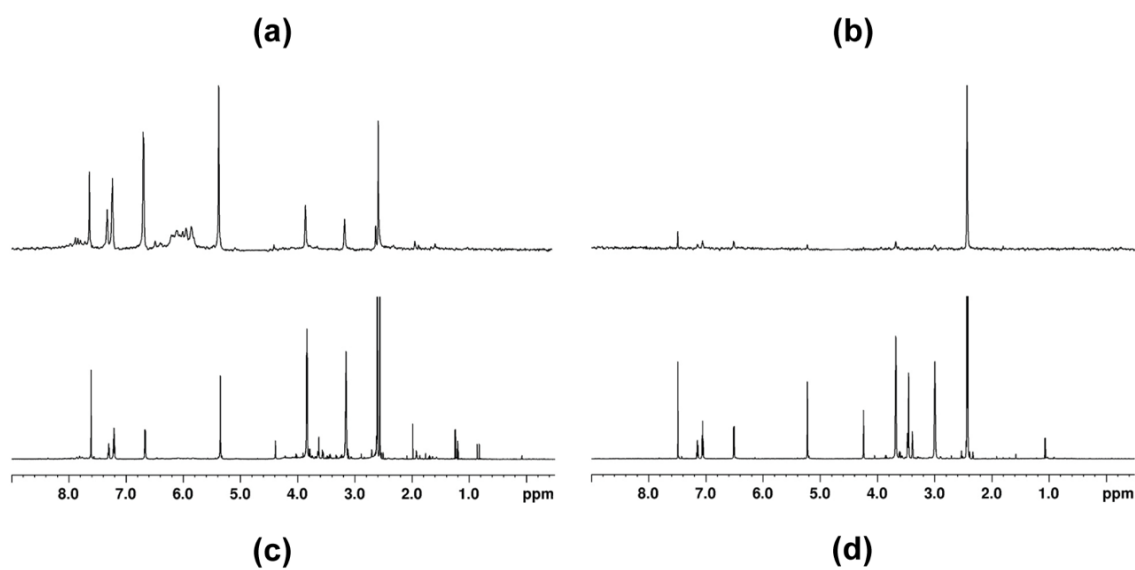

**Figure S13.** 1D  $^1\text{H}$  NMR spectra (**c** and **d**) and STD spectra (**a** and **b**) of compound **23a** (0.250 mM) in presence of *c-Myc G4* (**a** and **c**) and *hTeloC iM* (**b** and **d**).

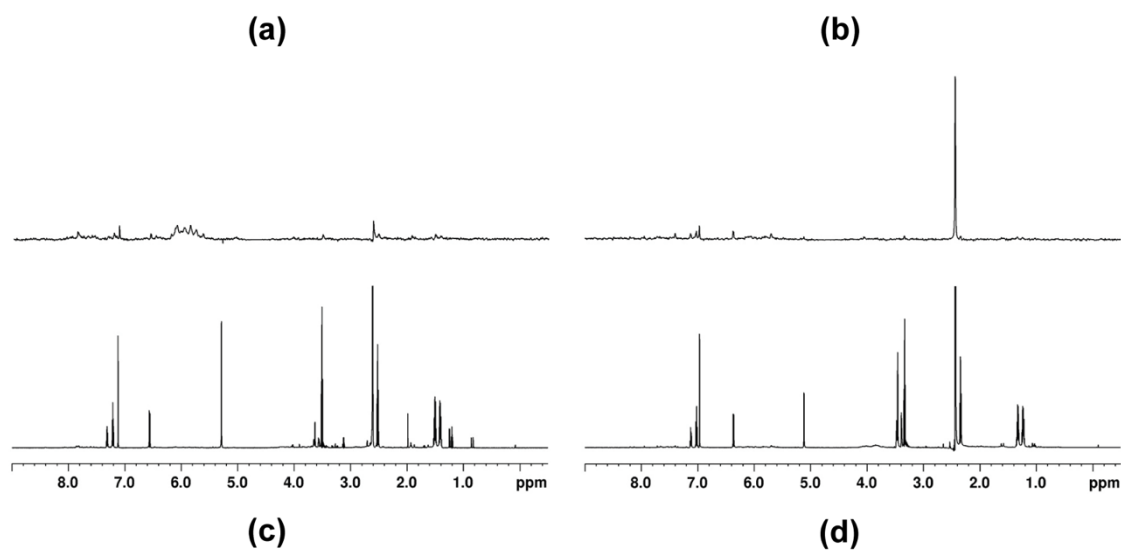

**Figure S14.** 1D  $^1\text{H}$  NMR spectra (**c** and **d**) and STD spectra (**a** and **b**) of compound **21d** (0.250 mM) in presence of *c-Myc G4* (**a** and **c**) and *hTeloC iM* (**b** and **d**).

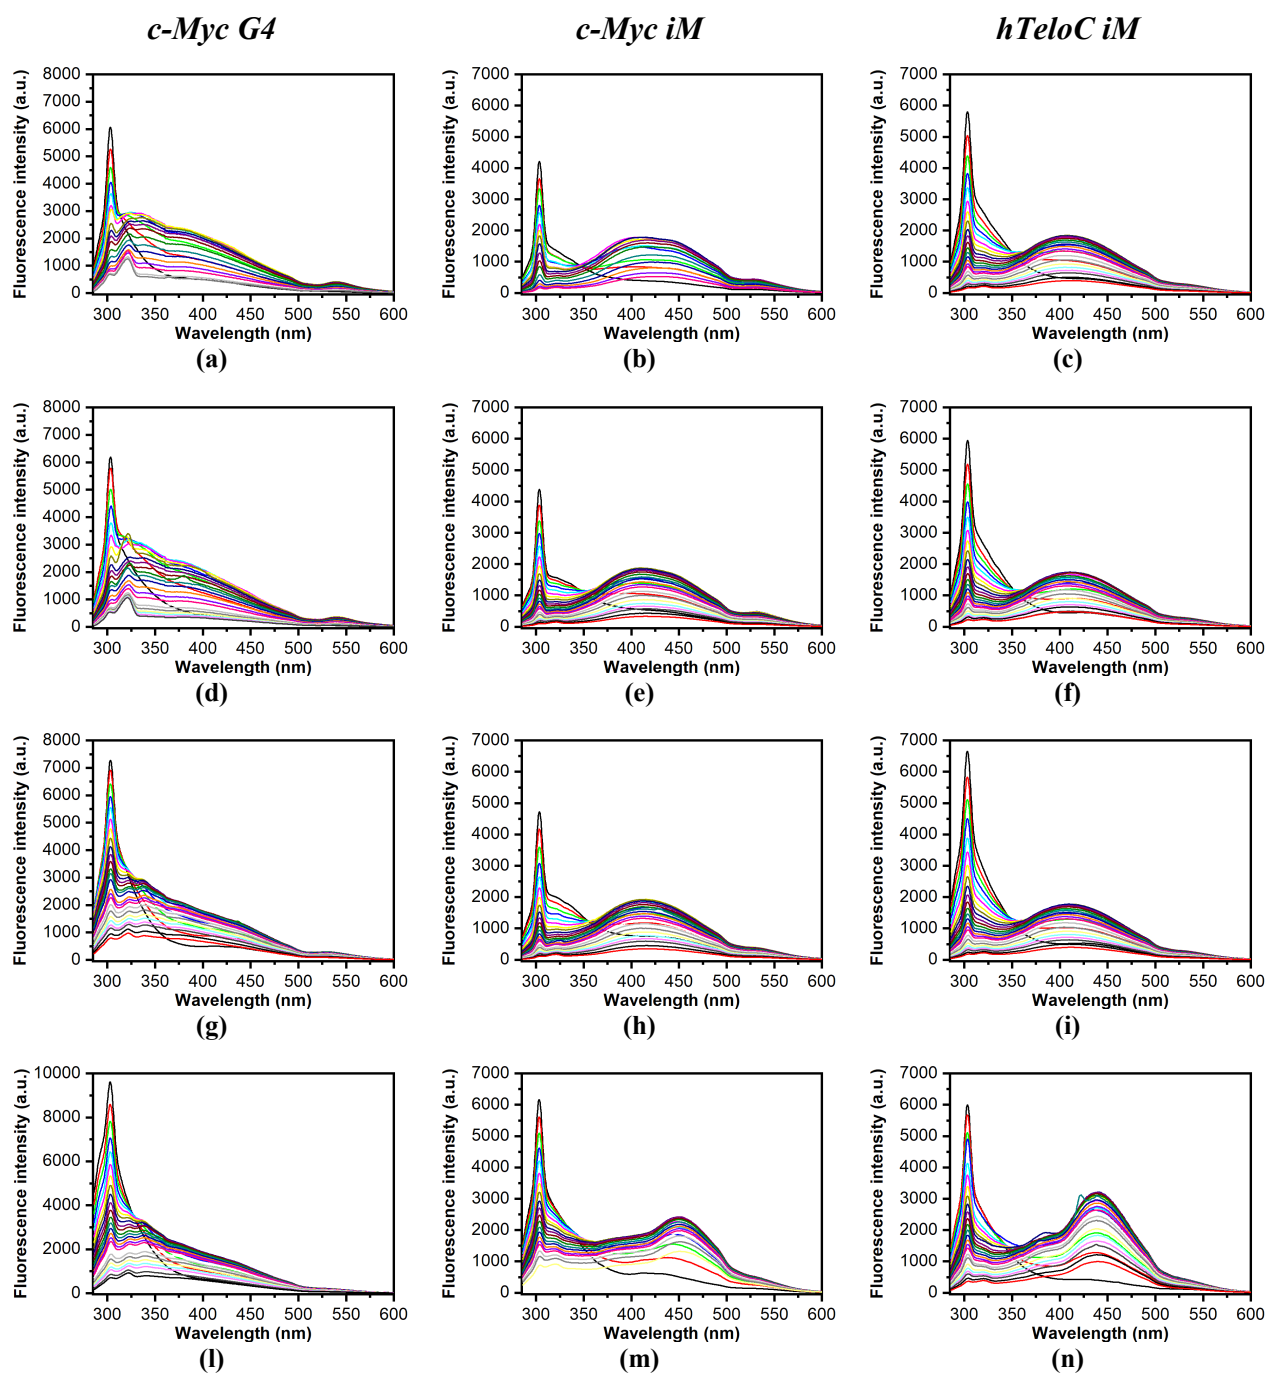

**Figure S15.** Representative fluorescence emission spectra of (a,b,c) 20a, (d,e,f) 23a, (g,h,i) 15c, and (l,m,n) 18c (2.5–3.5  $\mu$ M) in the absence and presence of stepwise additions (5  $\mu$ L) of *c-Myc G4*, *c-Myc iM*, or *hTeloC iM* (150–200  $\mu$ M), at 25  $^{\circ}$ C.

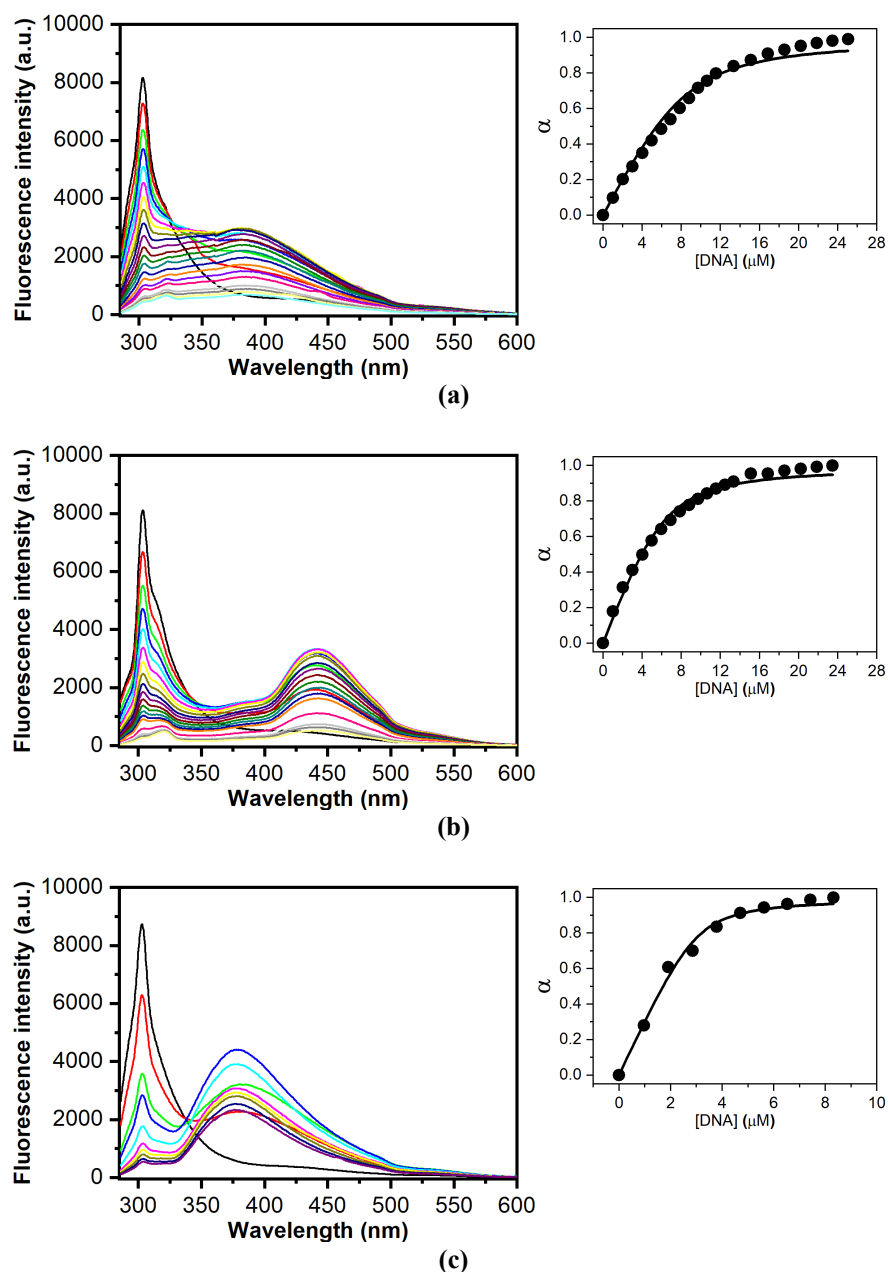

**Figure S16.** Representative fluorescence emission spectra of (a,b) **21d**, and (c) **18c** (2.5–3.5  $\mu\text{M}$ ) in the absence and presence of stepwise additions (5  $\mu\text{L}$ ) of (a) *c-Myc G4*, (b) *c-Myc iM*, or (c) single-stranded DNA d(CT)<sub>15</sub> (150–200  $\mu\text{M}$ ), at 25 °C. Insets show the titration curves obtained by plotting the fraction of bound compound ( $\alpha$ ) versus DNA concentration.

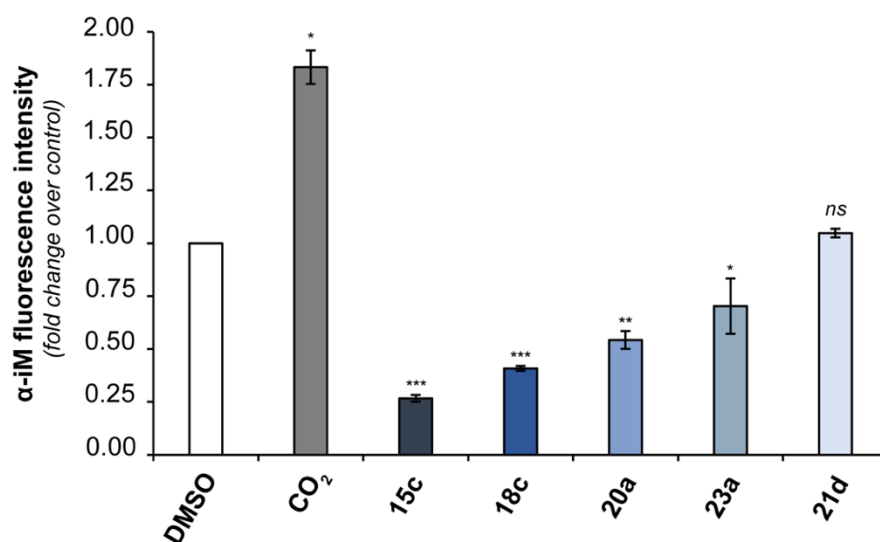

(a)

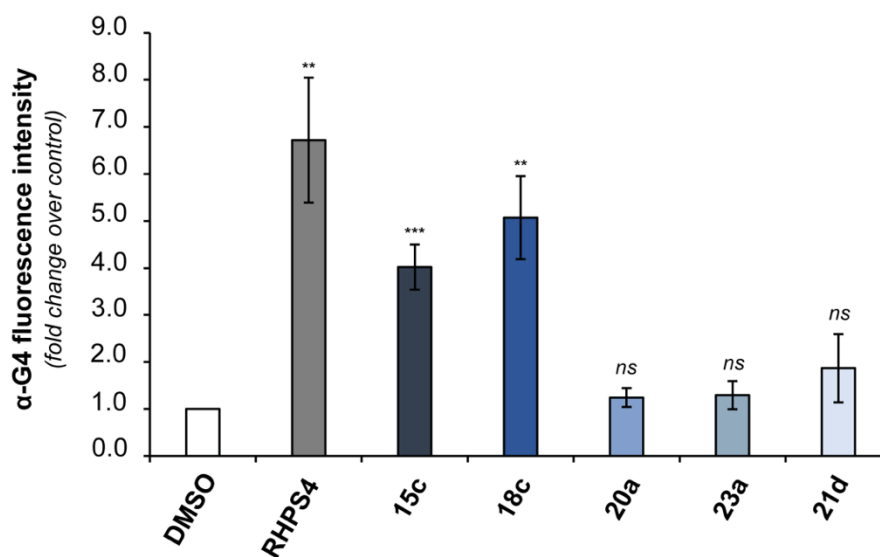

(b)

**Figure S17.** Quantitative analysis of fluorescence intensity of anti-iM (a) and anti-G4 (b) signal. For each panel, 25 cells/condition were analysed by ImageJ software and the results were expressed as fold change of fluorescence intensity over the negative control (DMSO). Results are referred to the images shown in Figures 6 and 7, respectively. Histograms show the mean  $\pm$  SD of three independent experiments. Statistical significance was calculated using unpaired student *t*-tests on GraphPad Prism 6 (\*\*\* $p$ <0.001; \*\* $p$ <0.01; \* $p$ <0.05).

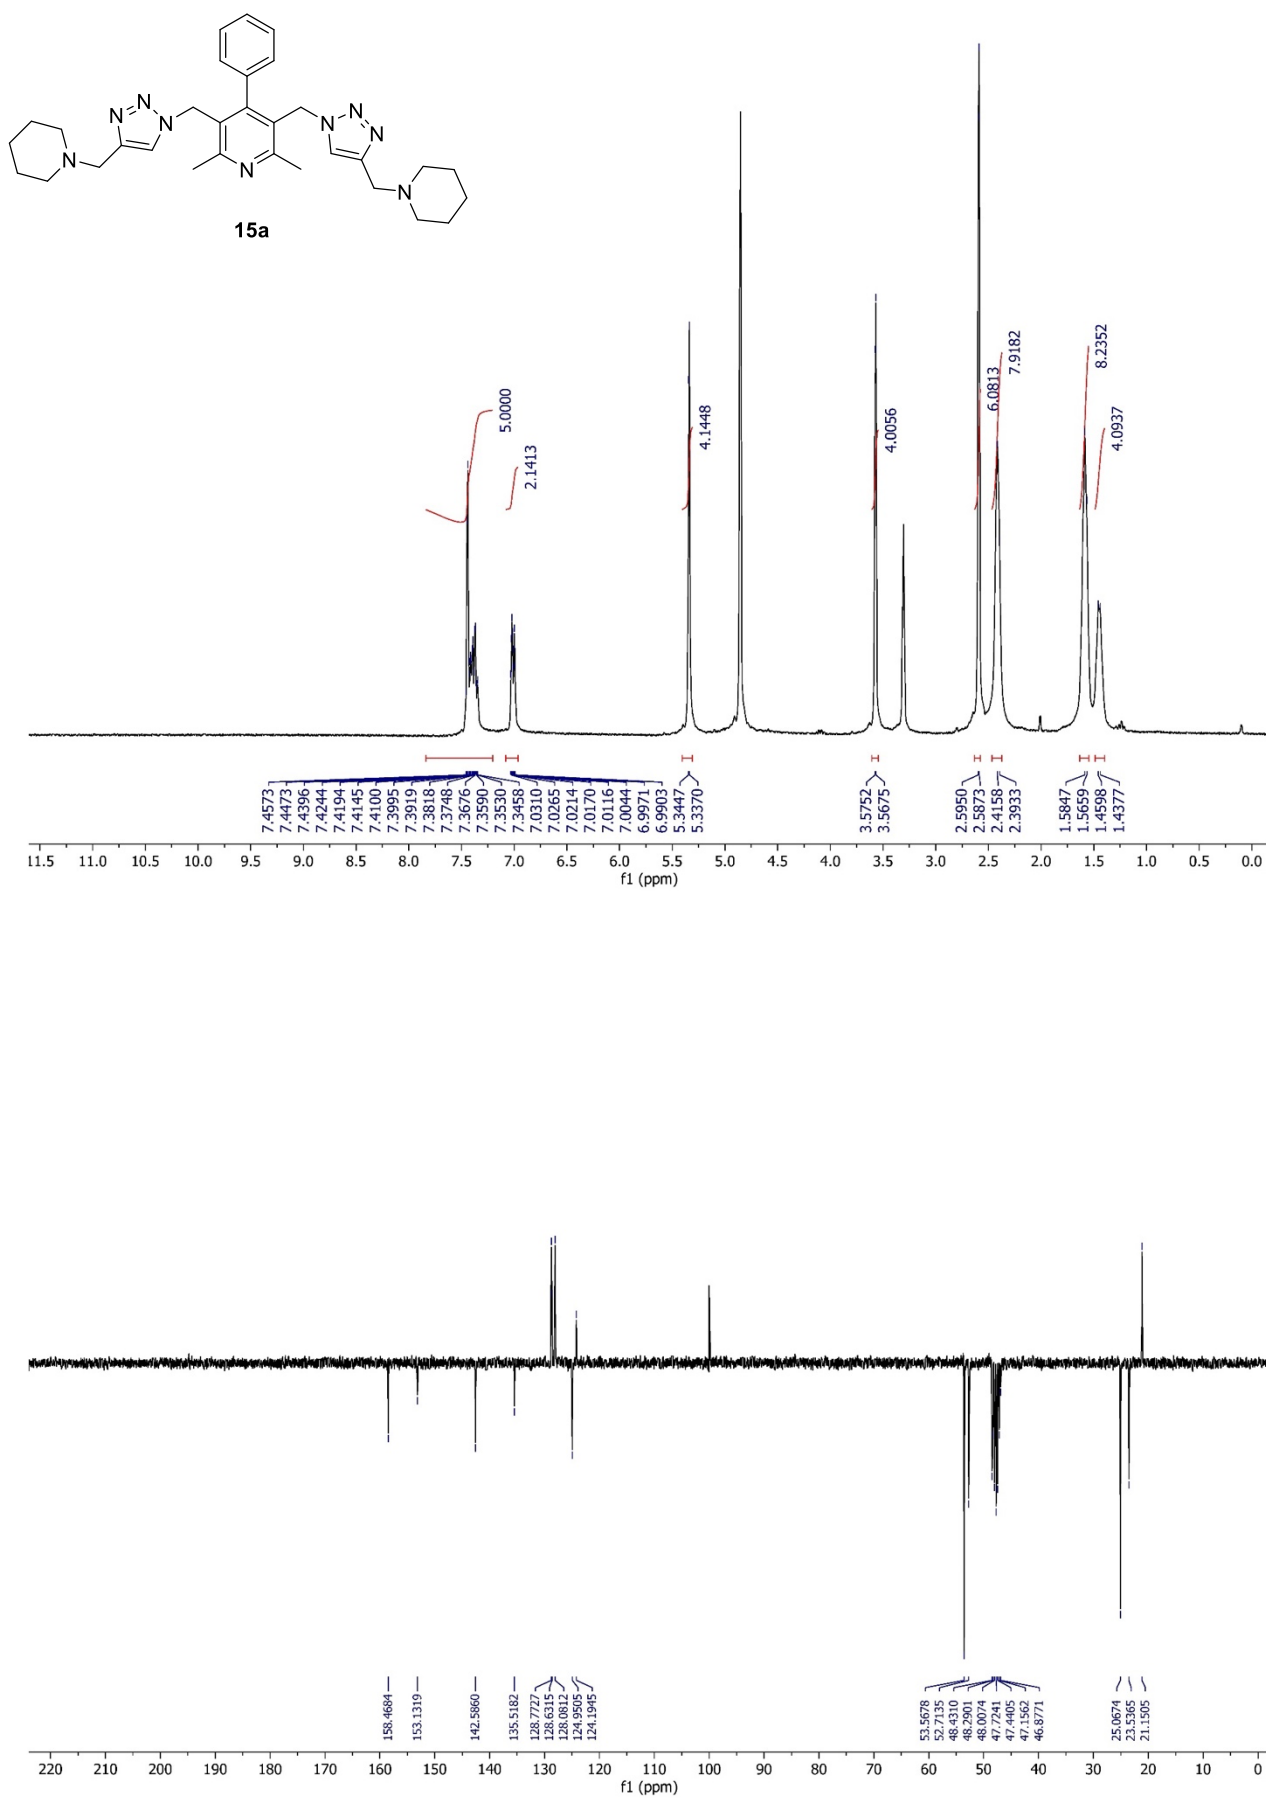

**Figure S18.** 1D <sup>1</sup>H (top) and <sup>13</sup>C APT (bottom) NMR spectra of compound **15a**.



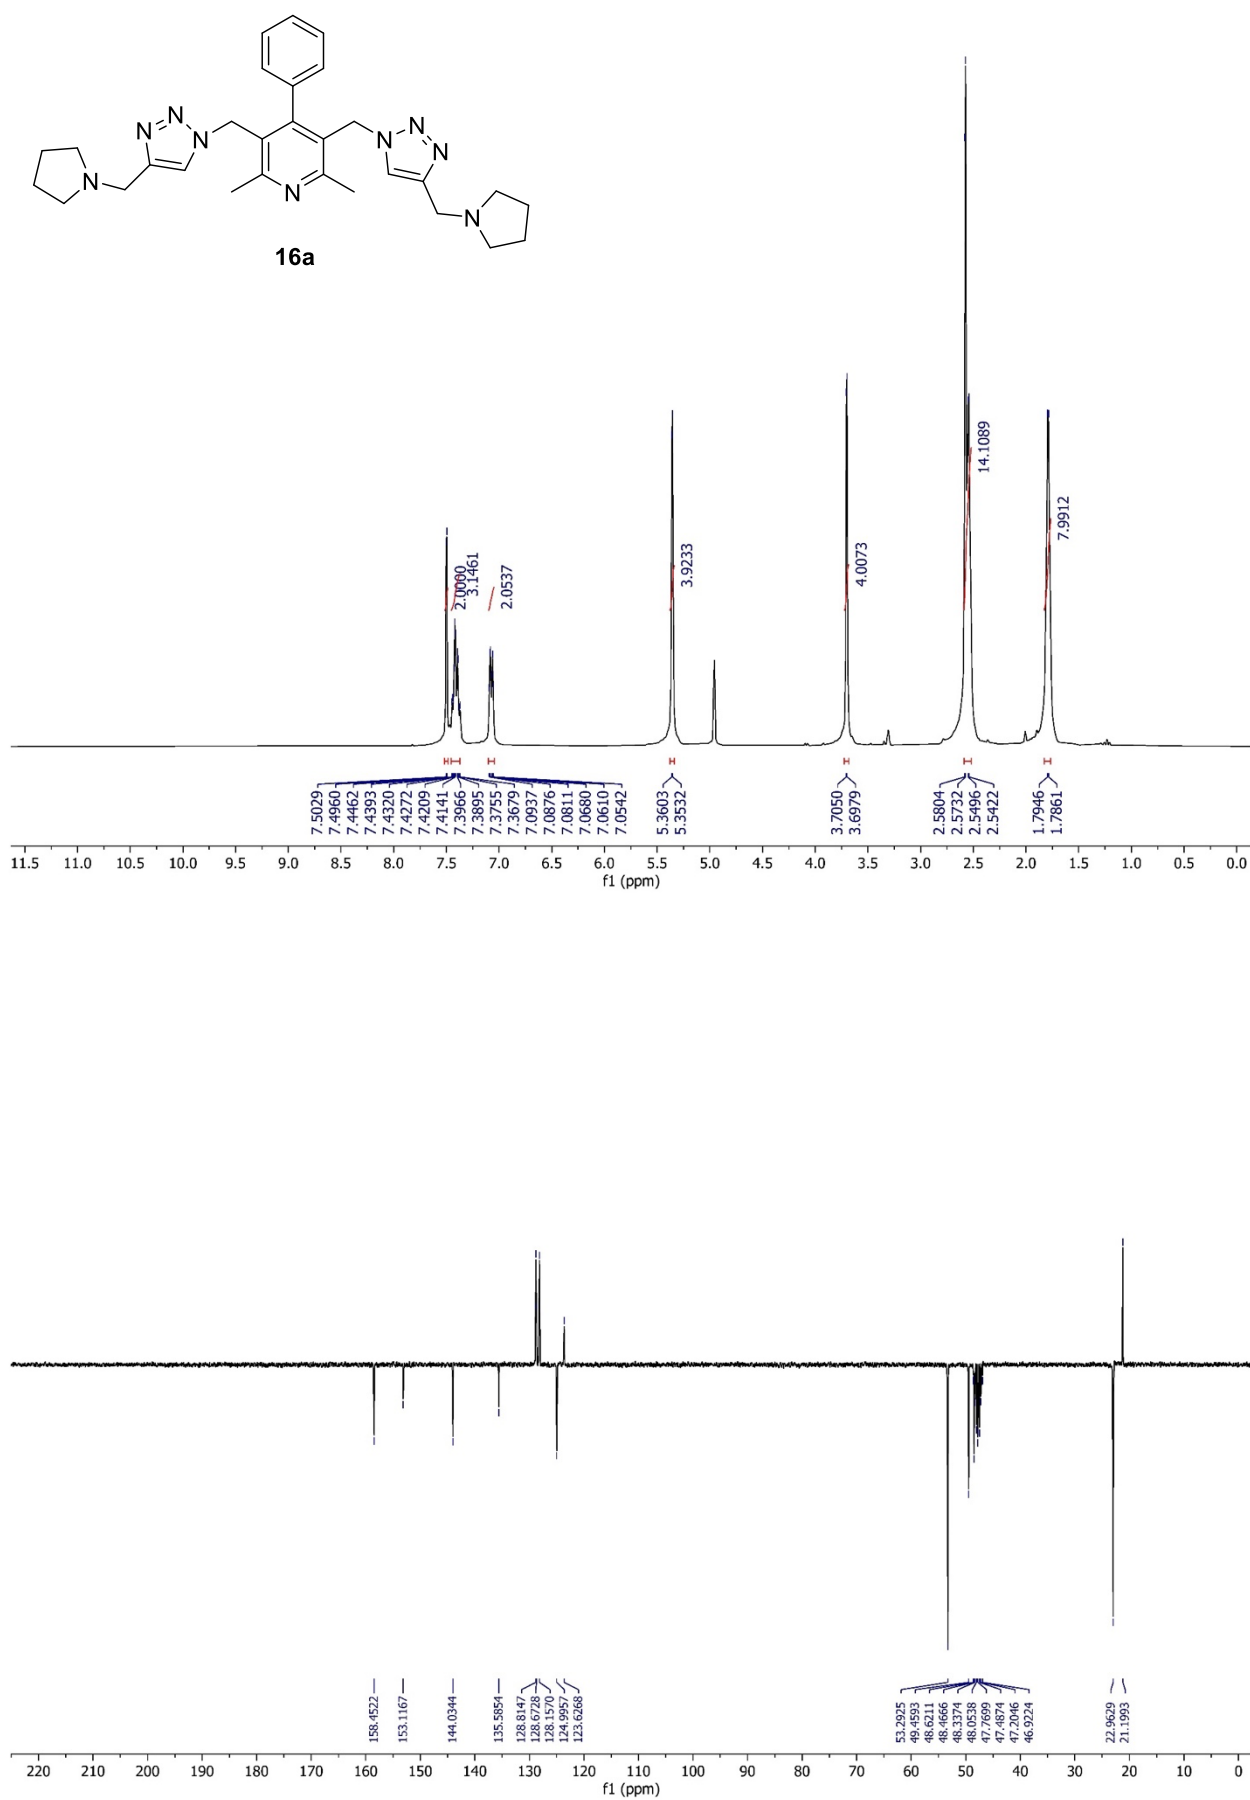

**Figure S19.** 1D <sup>1</sup>H (top) and <sup>13</sup>C APT (bottom) NMR spectra of compound **16a**.

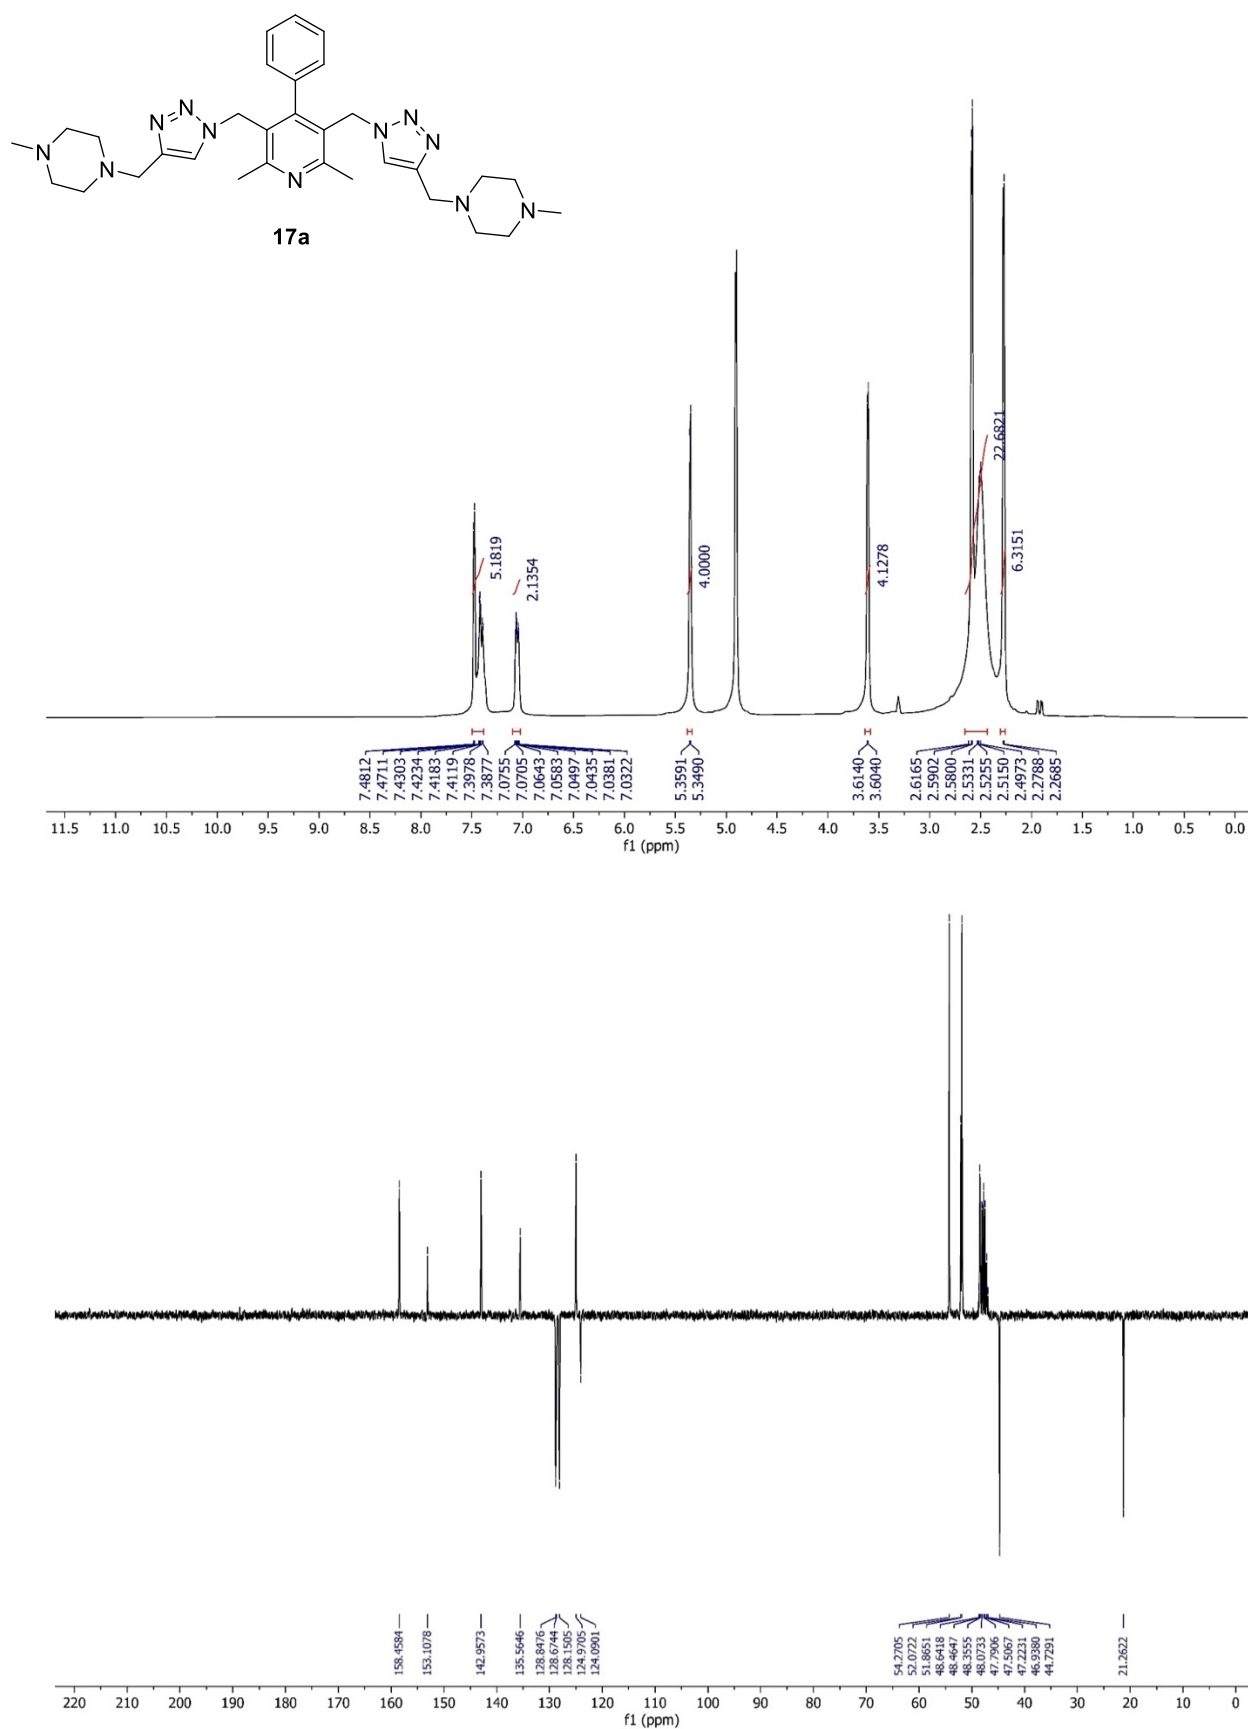

**Figure S20.** 1D <sup>1</sup>H (top) and <sup>13</sup>C APT (bottom) NMR spectra of compound **17a**.

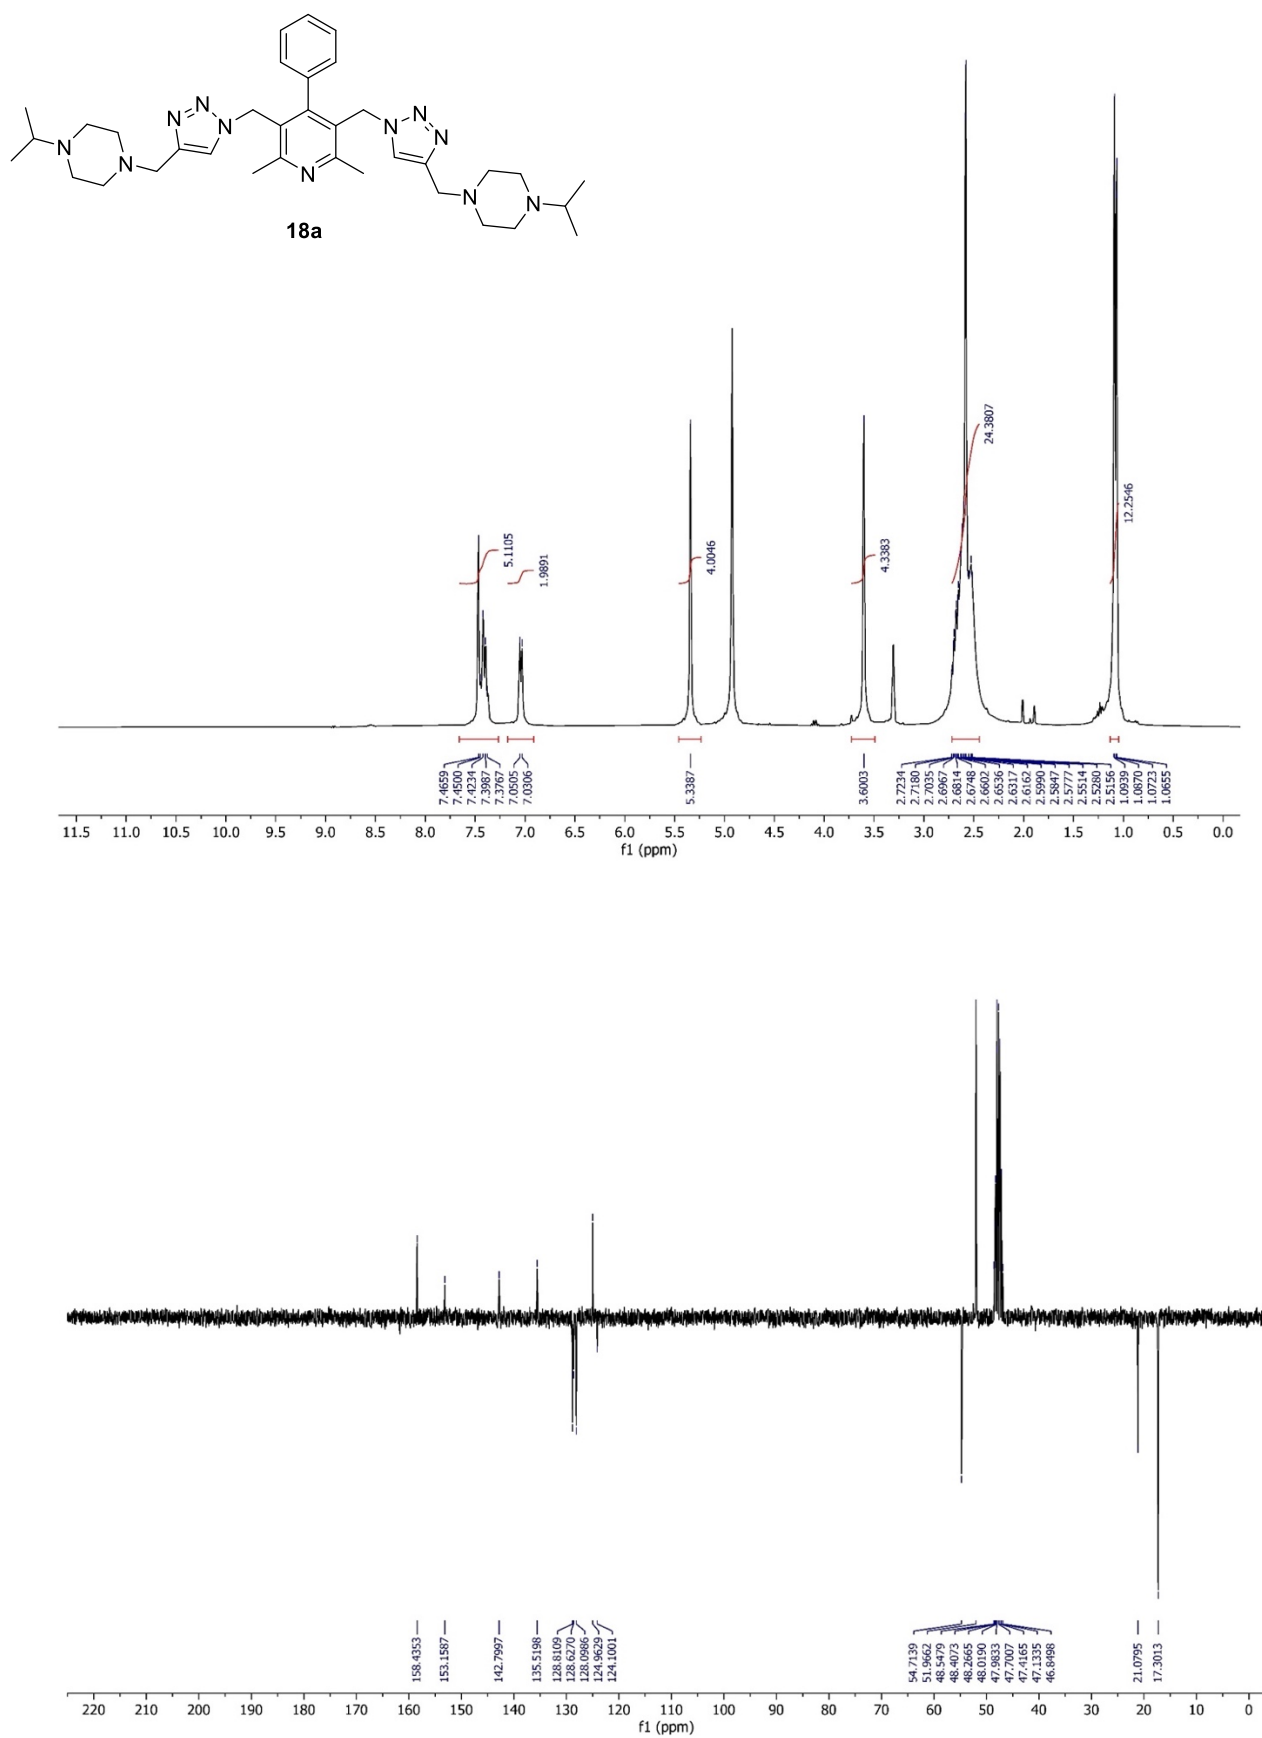

**Figure S21.** 1D <sup>1</sup>H (top) and <sup>13</sup>C APT (bottom) NMR spectra of compound **18a**.

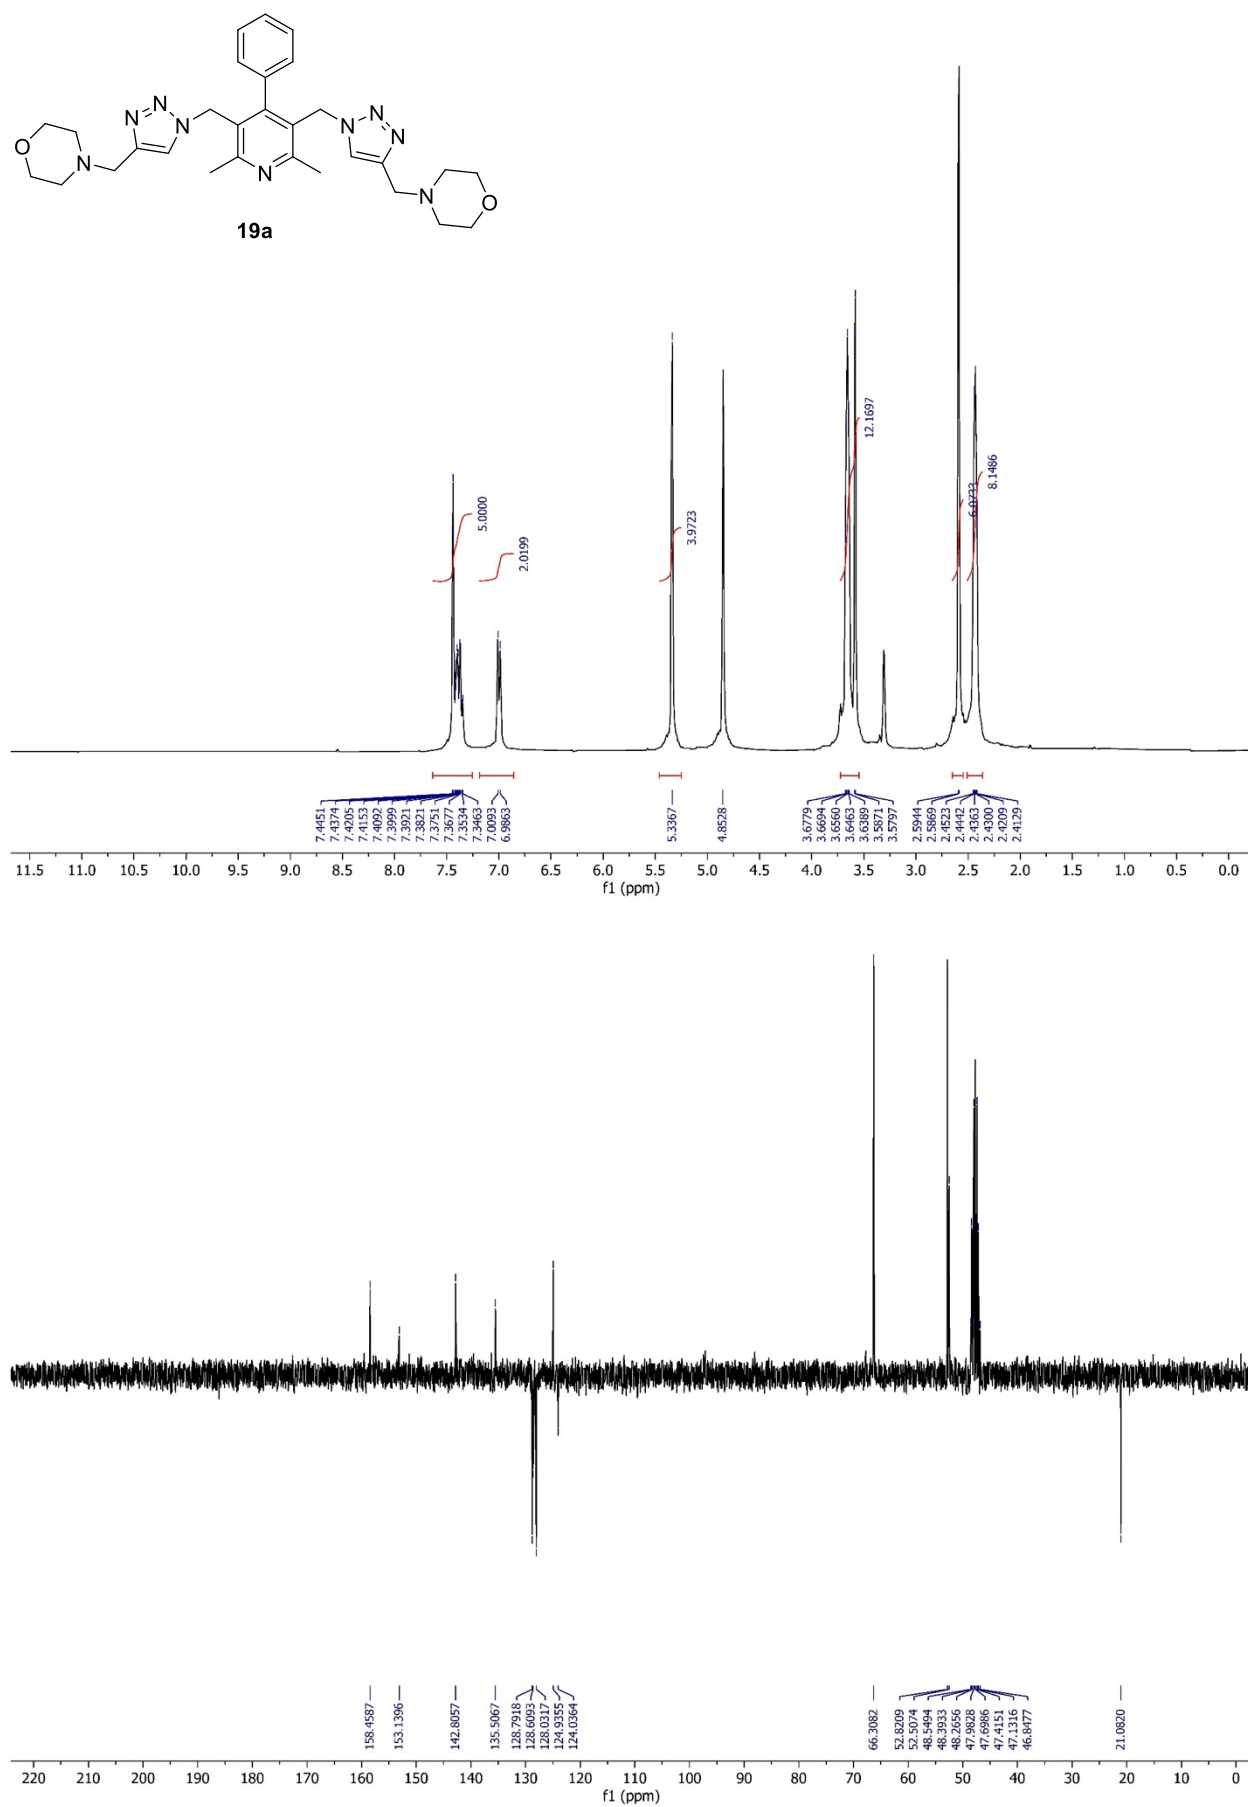

**Figure S22.** 1D <sup>1</sup>H (top) and <sup>13</sup>C APT (bottom) NMR spectra of compound **19a**.

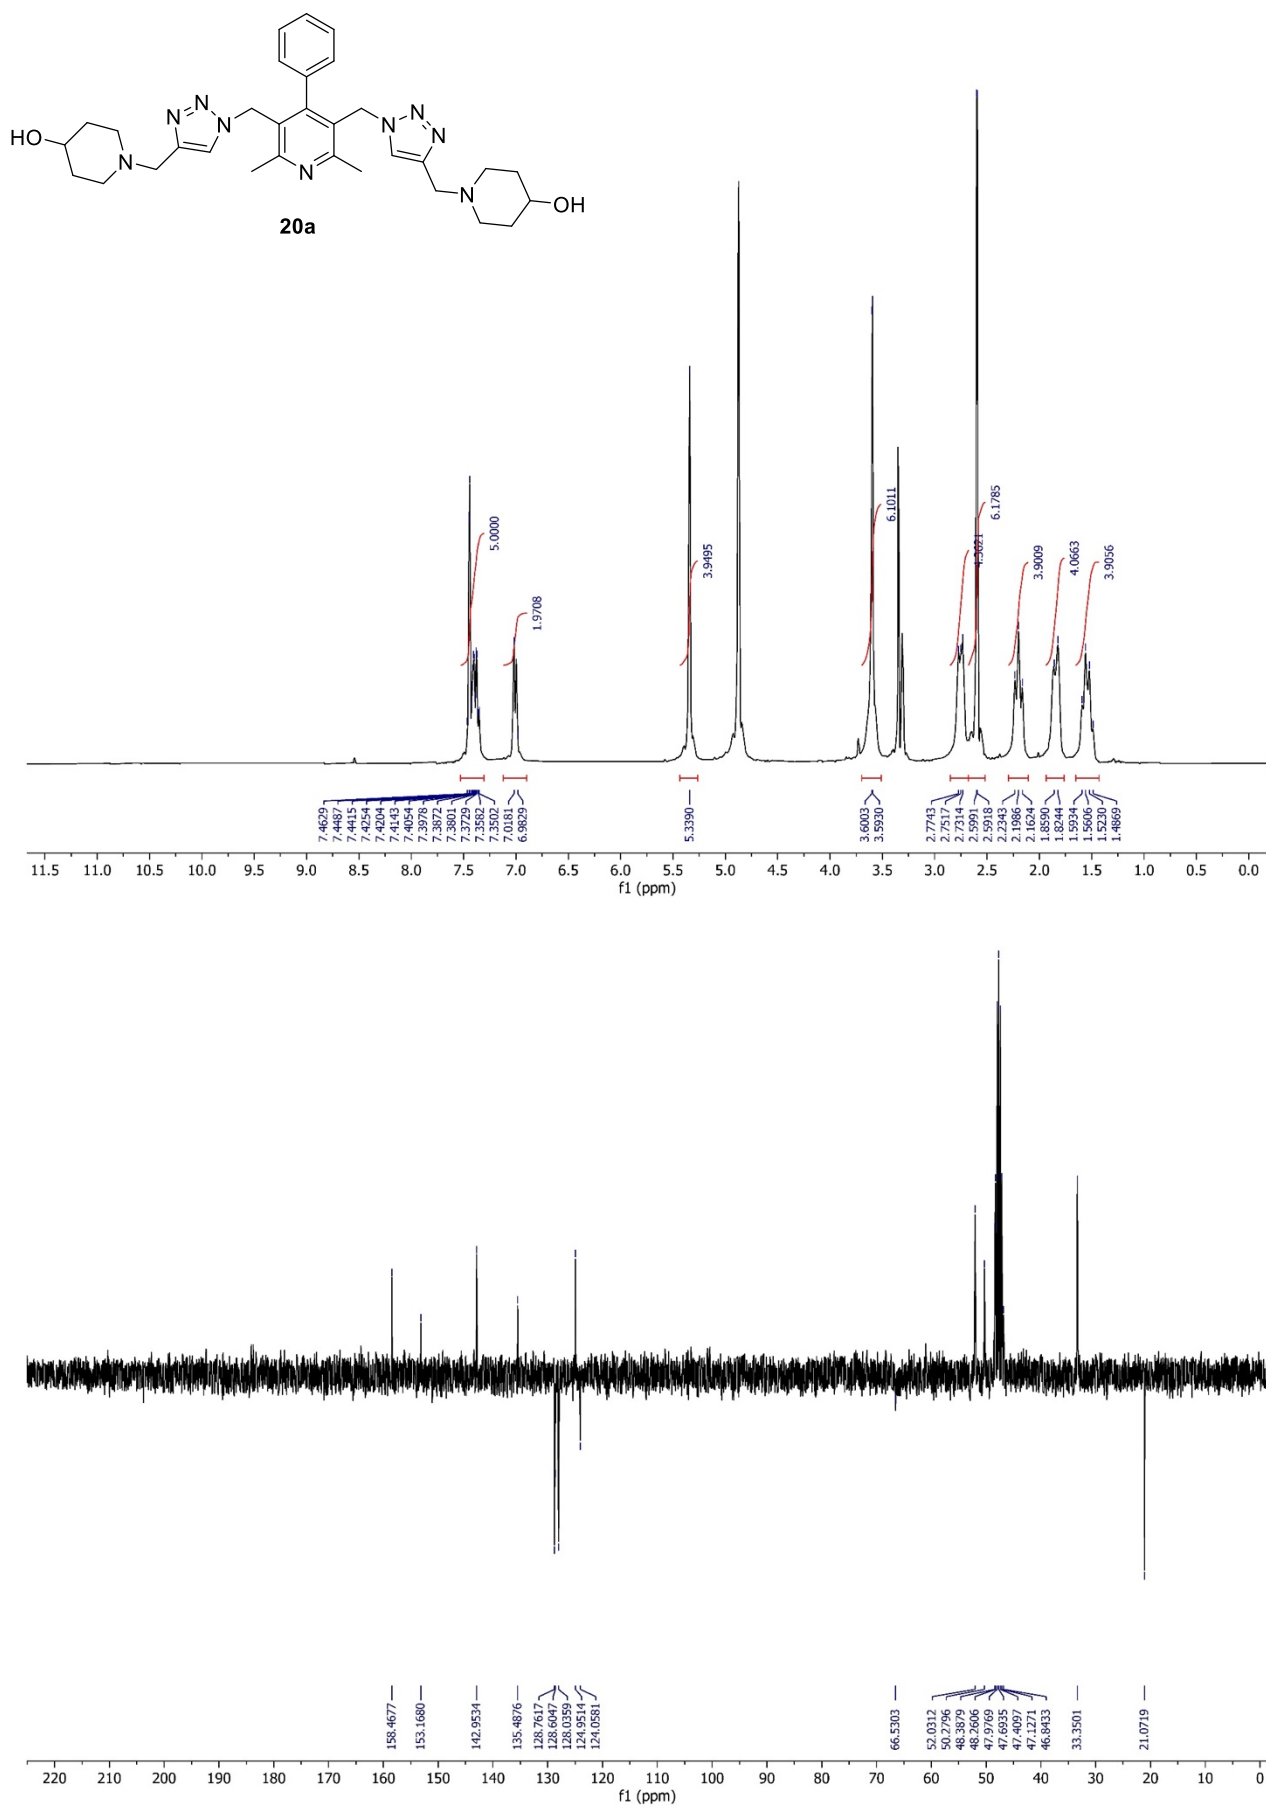

**Figure S23.** 1D <sup>1</sup>H (top) and <sup>13</sup>C APT (bottom) NMR spectra of compound **20a**.

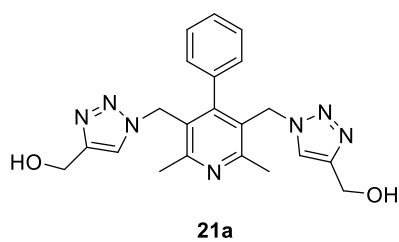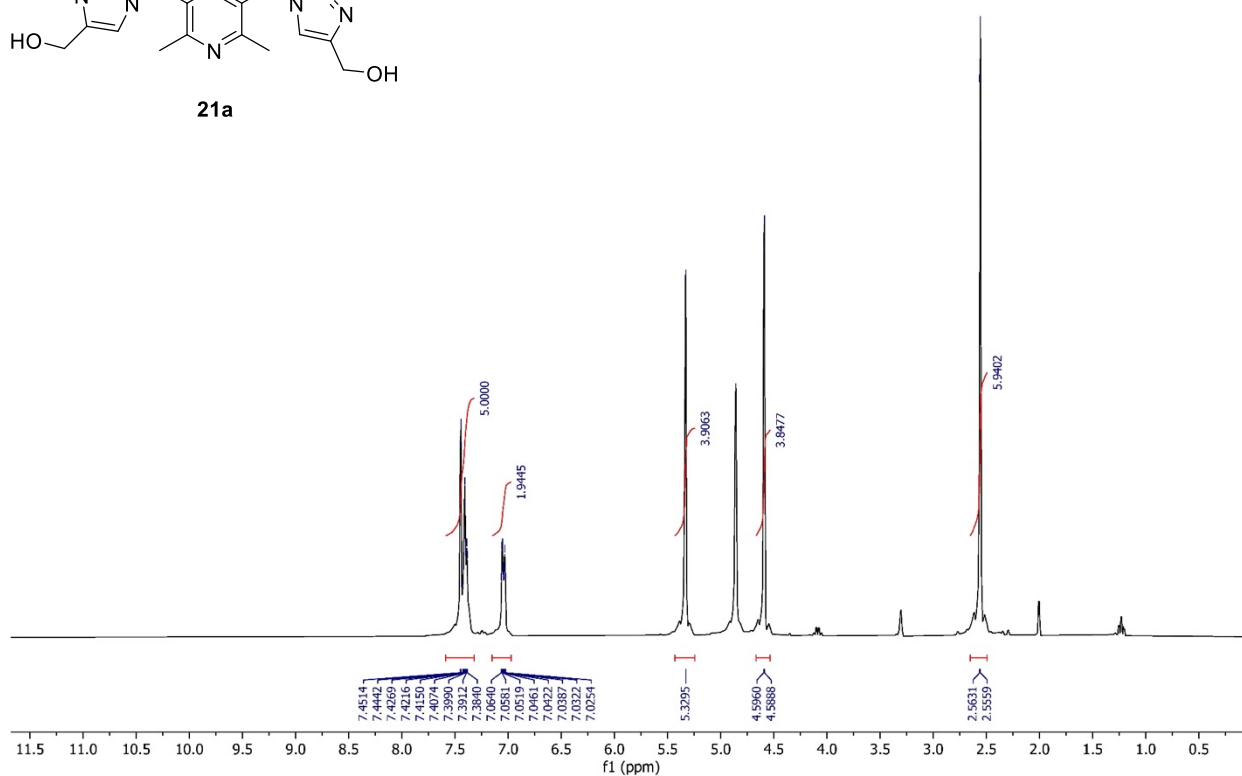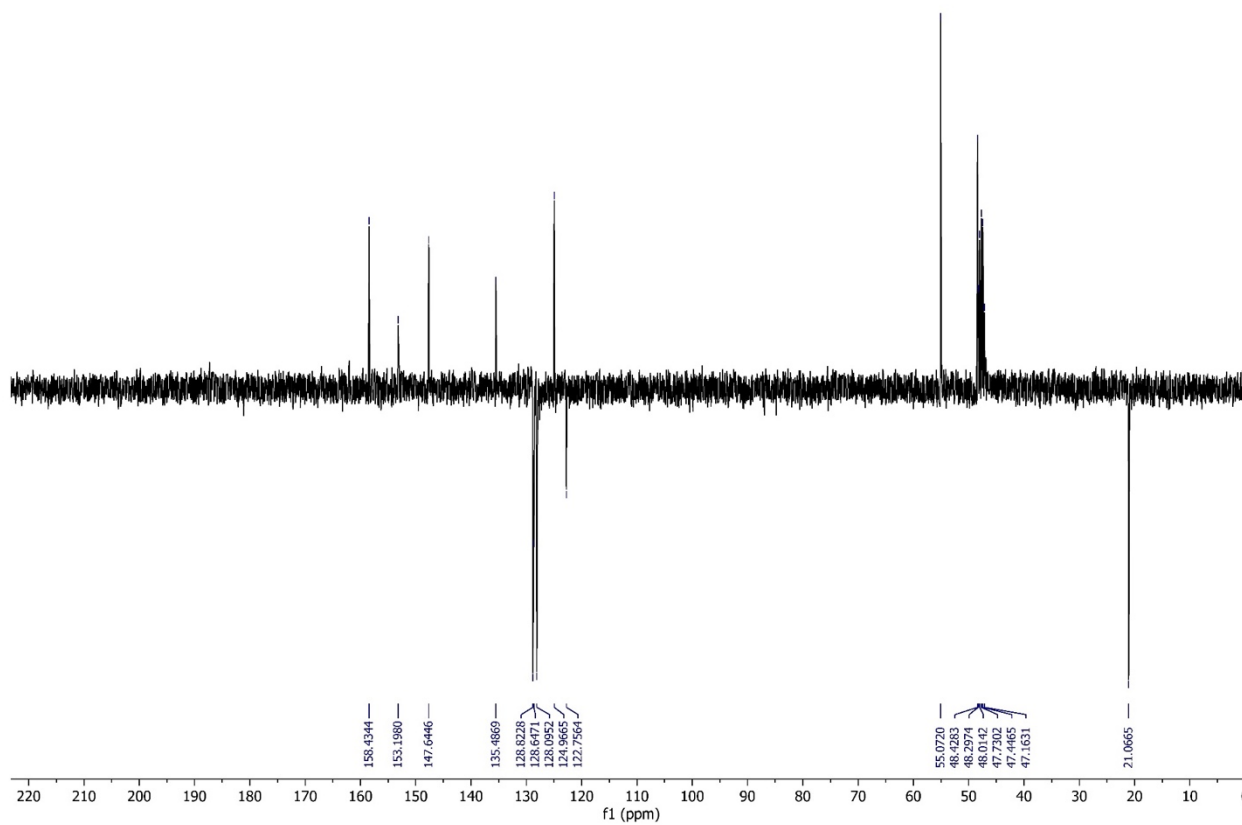

Figure S24. 1D <sup>1</sup>H (top) and <sup>13</sup>C APT (bottom) NMR spectra of compound **21a**.

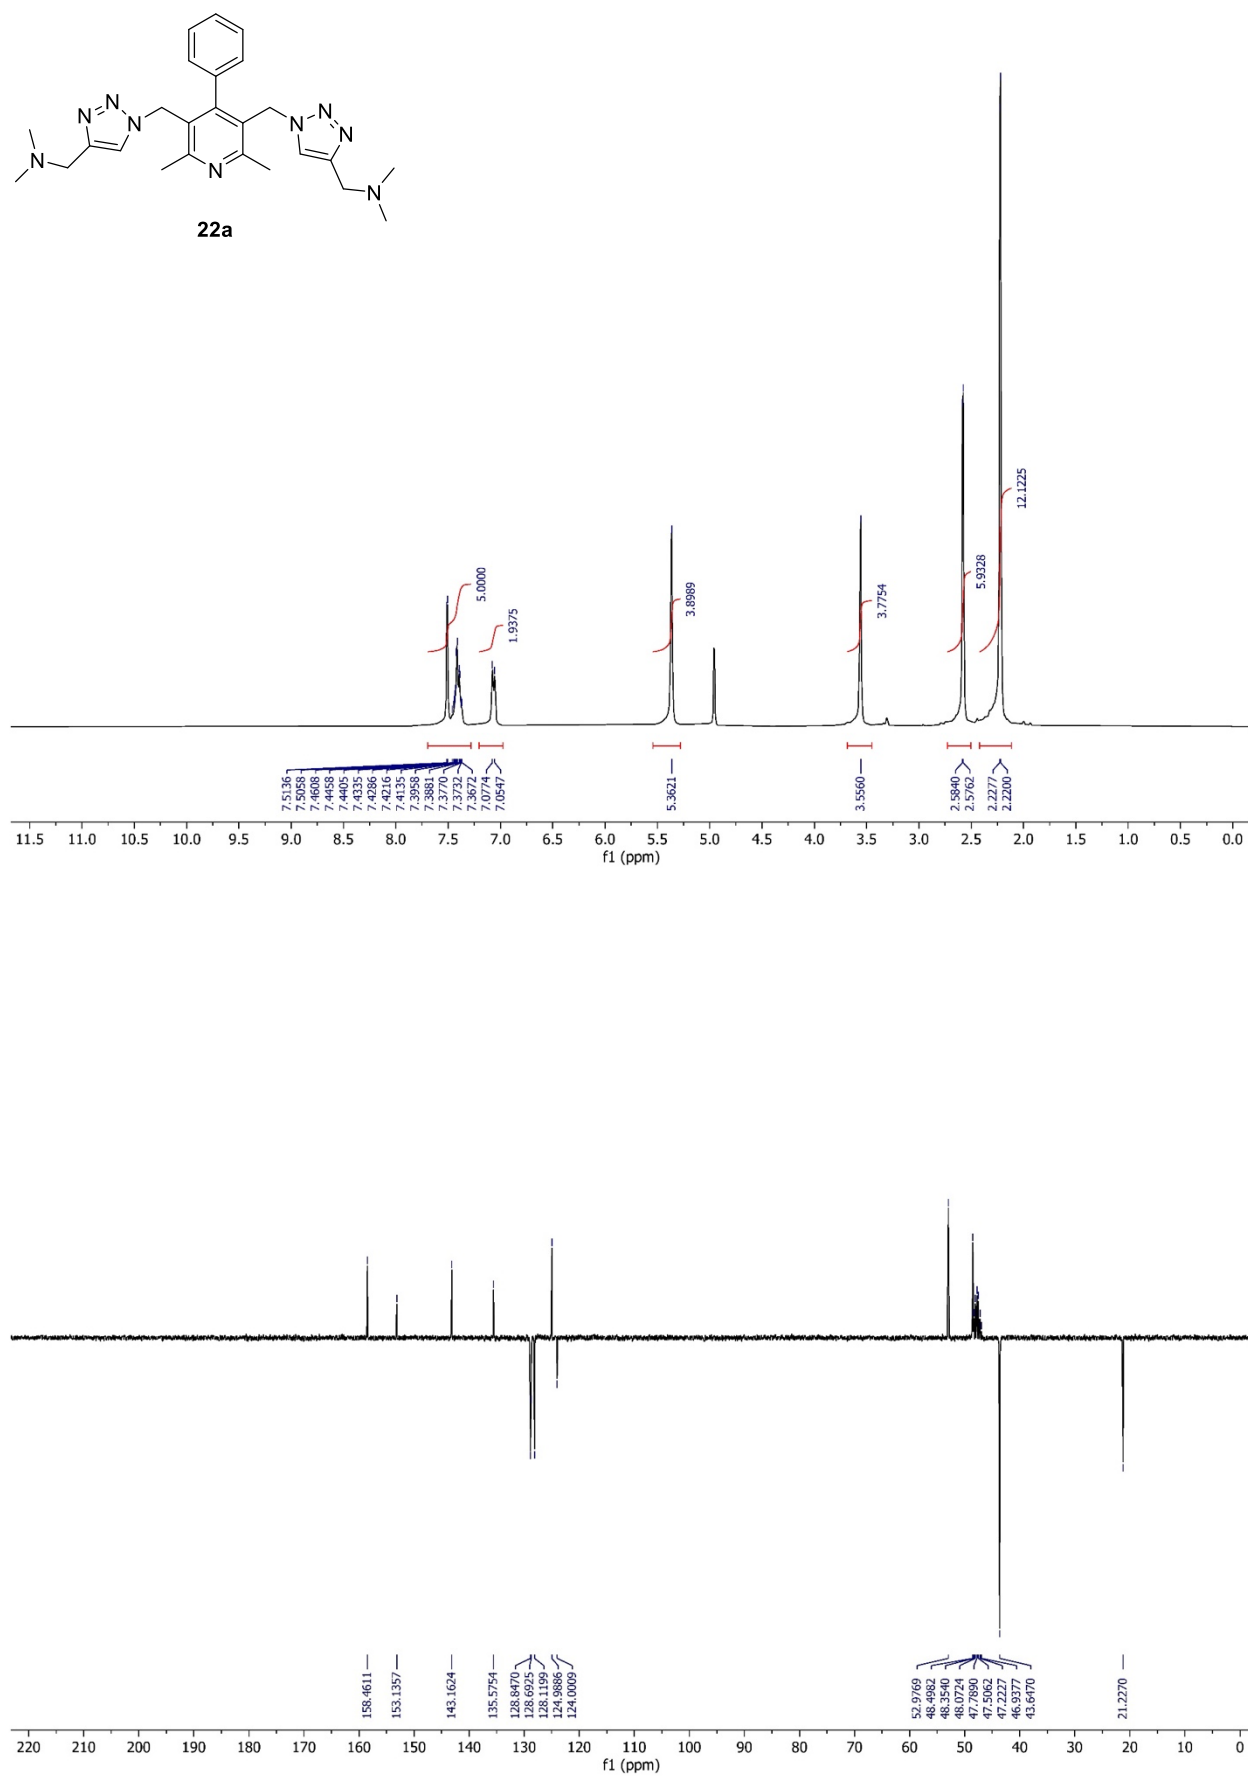

**Figure S25.** 1D <sup>1</sup>H (top) and <sup>13</sup>C APT (bottom) NMR spectra of compound **22a**.

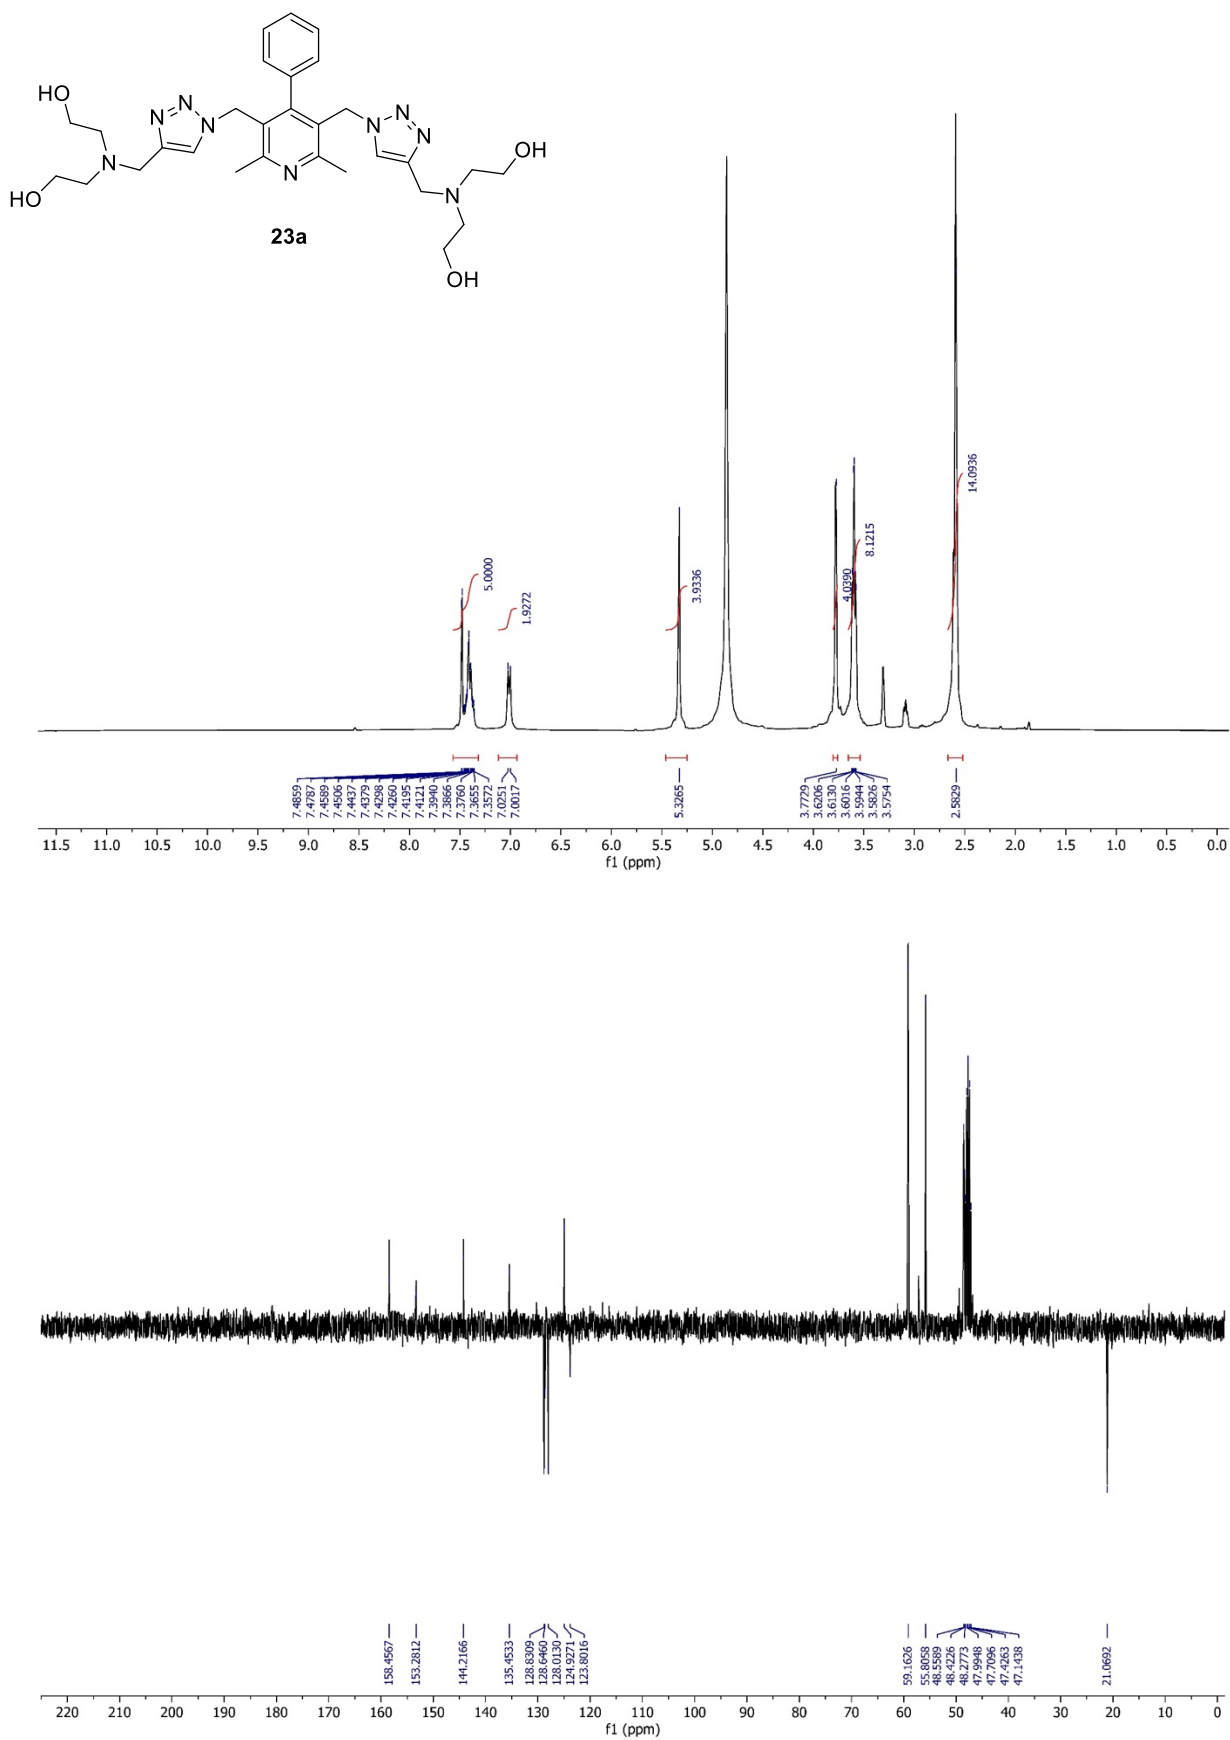

Figure S26. 1D  $^1\text{H}$  (top) and  $^{13}\text{C}$  APT (bottom) NMR spectra of compound **23a**.



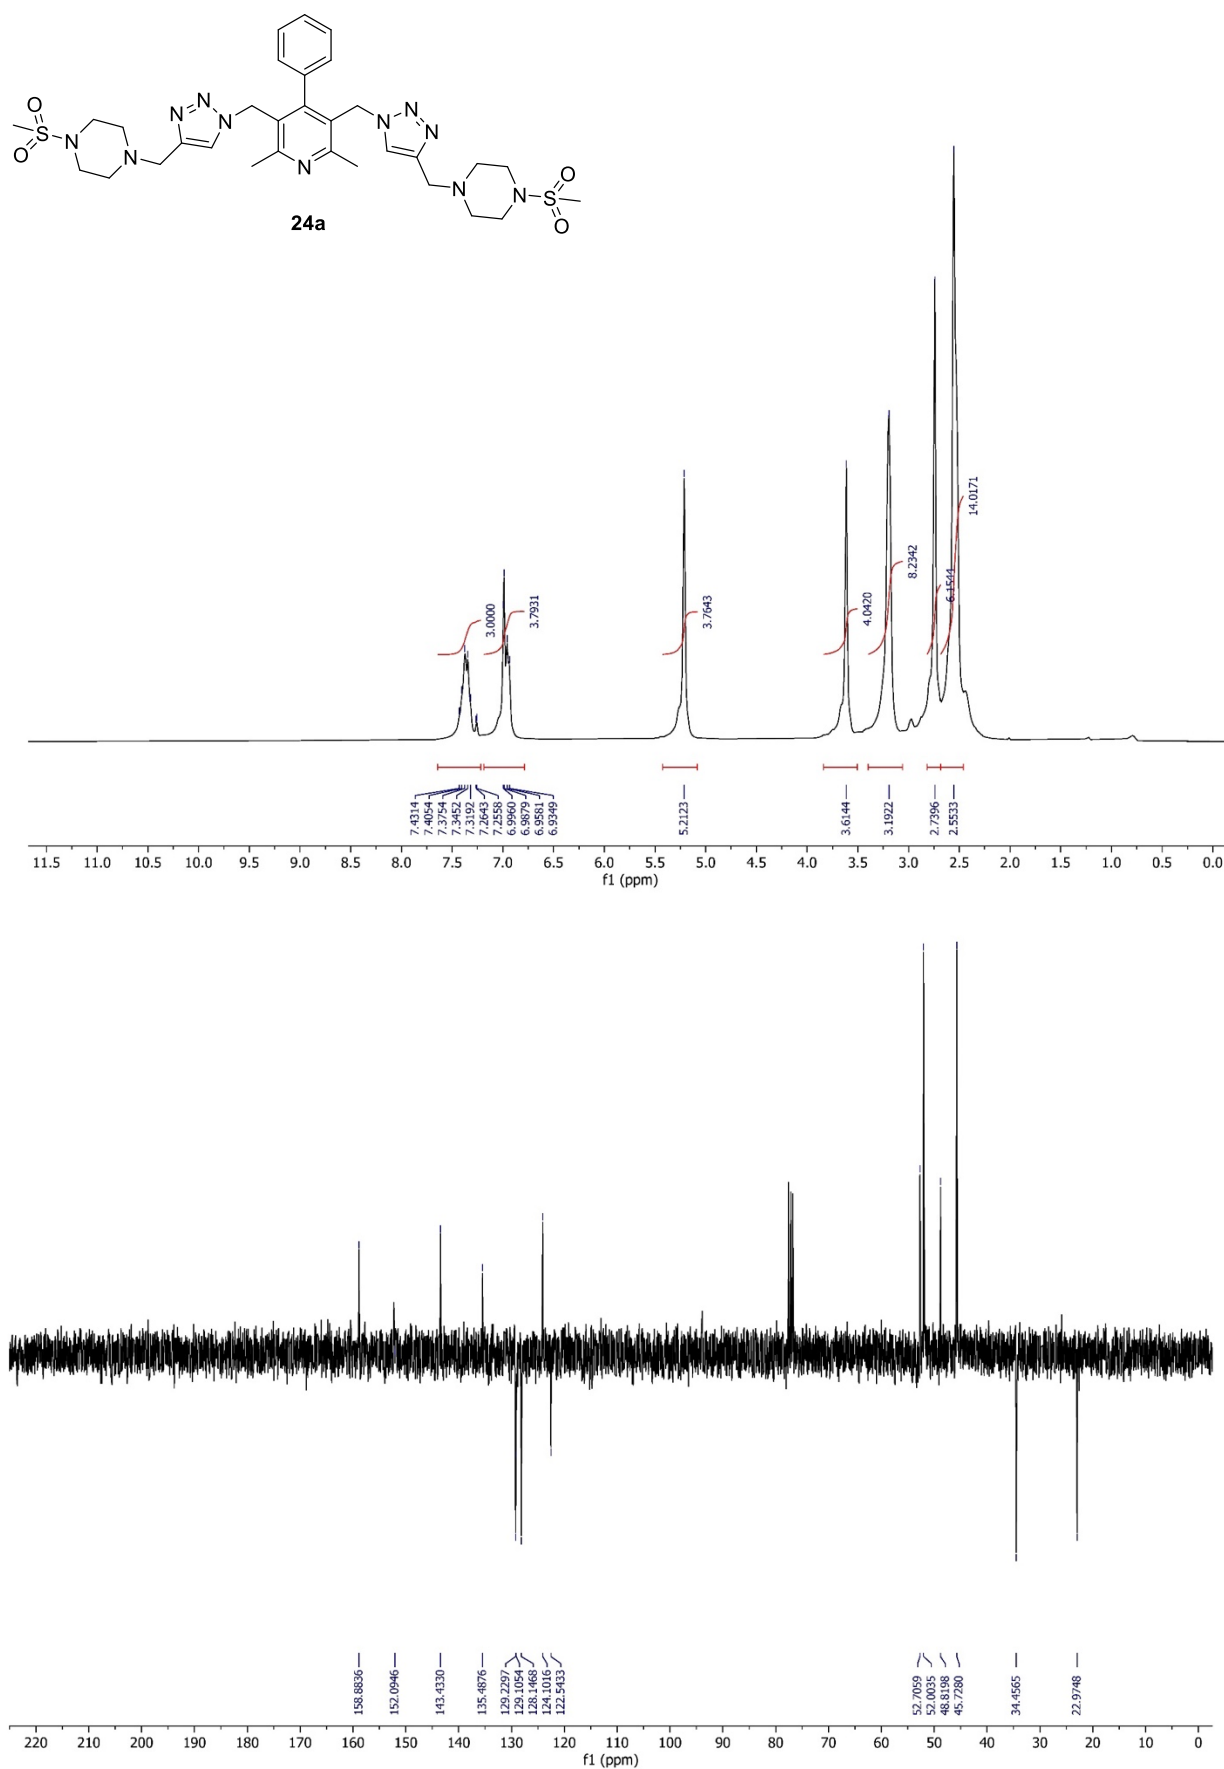

**Figure S27.** 1D <sup>1</sup>H (top) and <sup>13</sup>C APT (bottom) NMR spectra of compound **24a**.

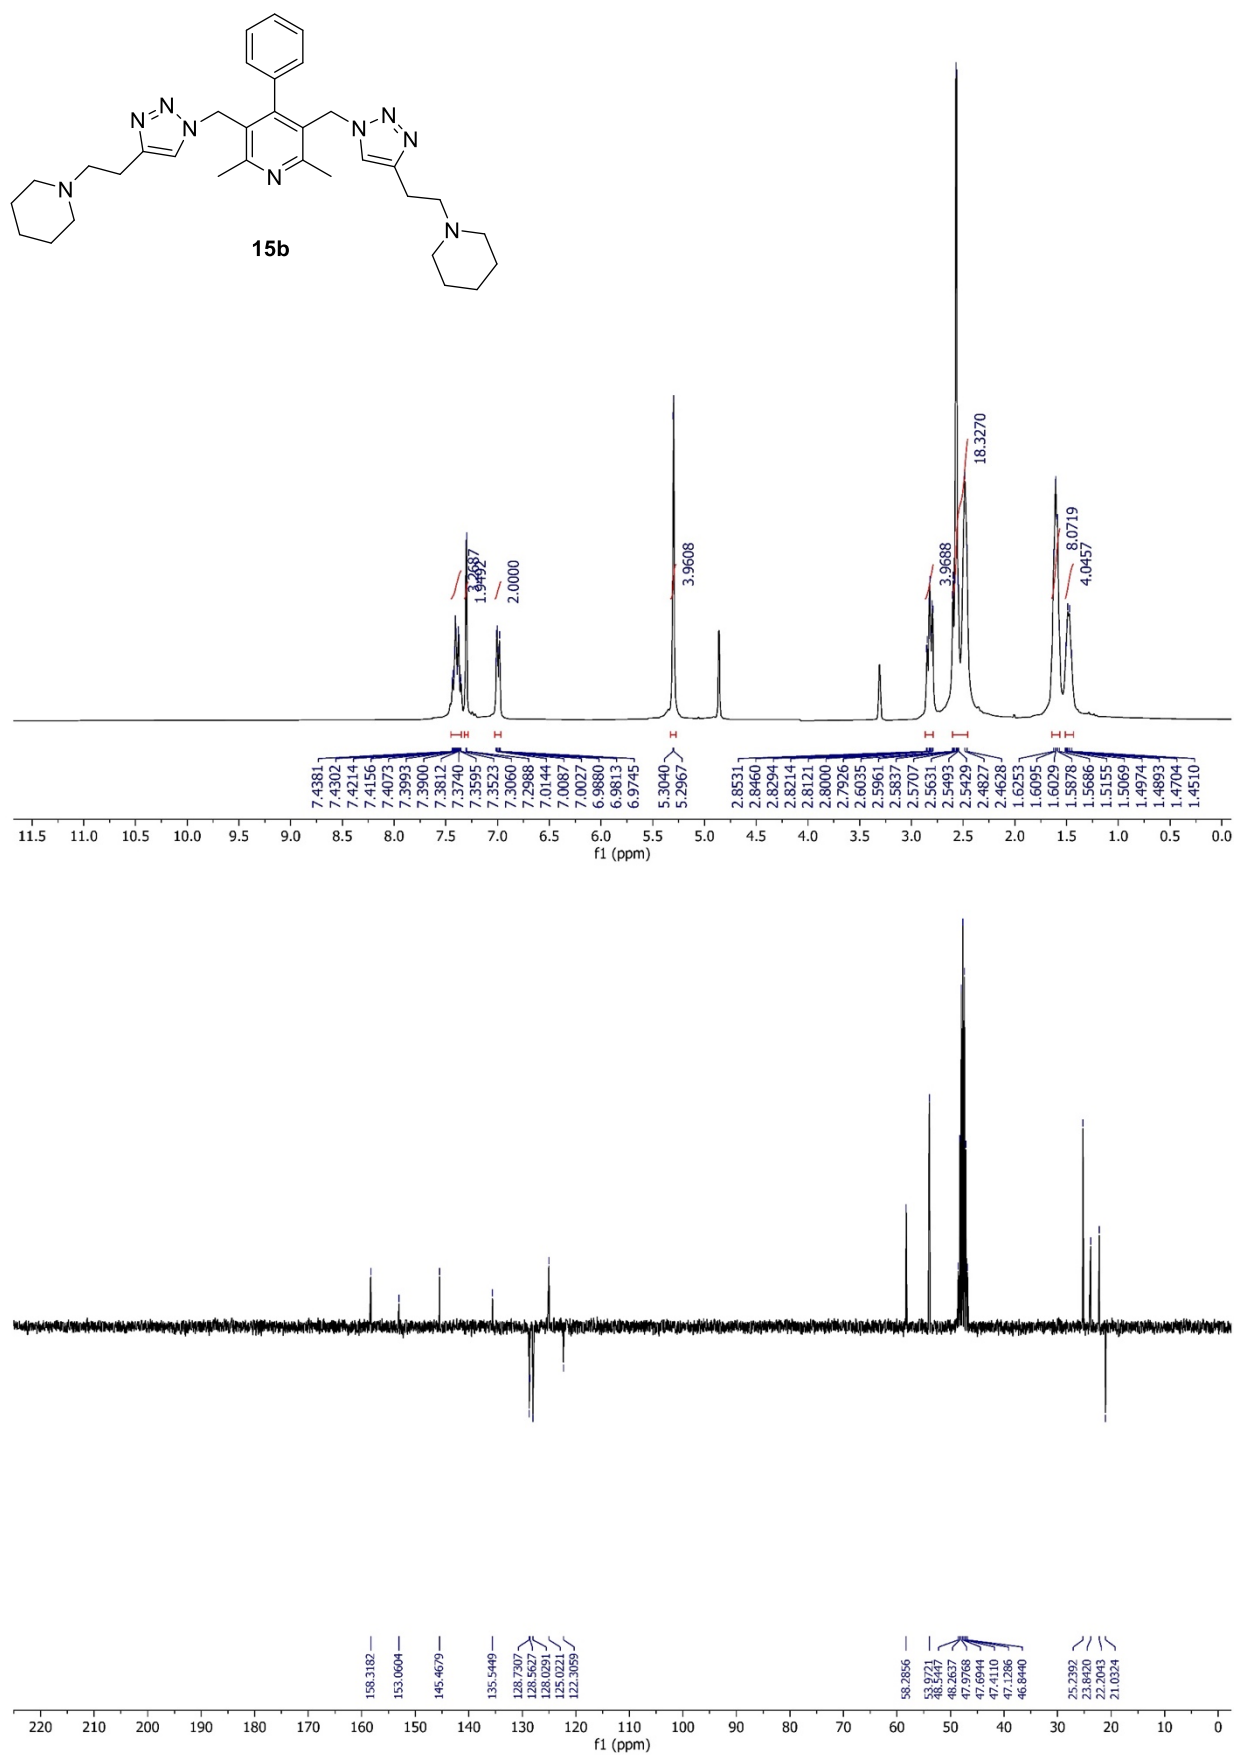

**Figure S28.** 1D  $^1\text{H}$  (top) and  $^{13}\text{C}$  APT (bottom) NMR spectra of compound **15b**.

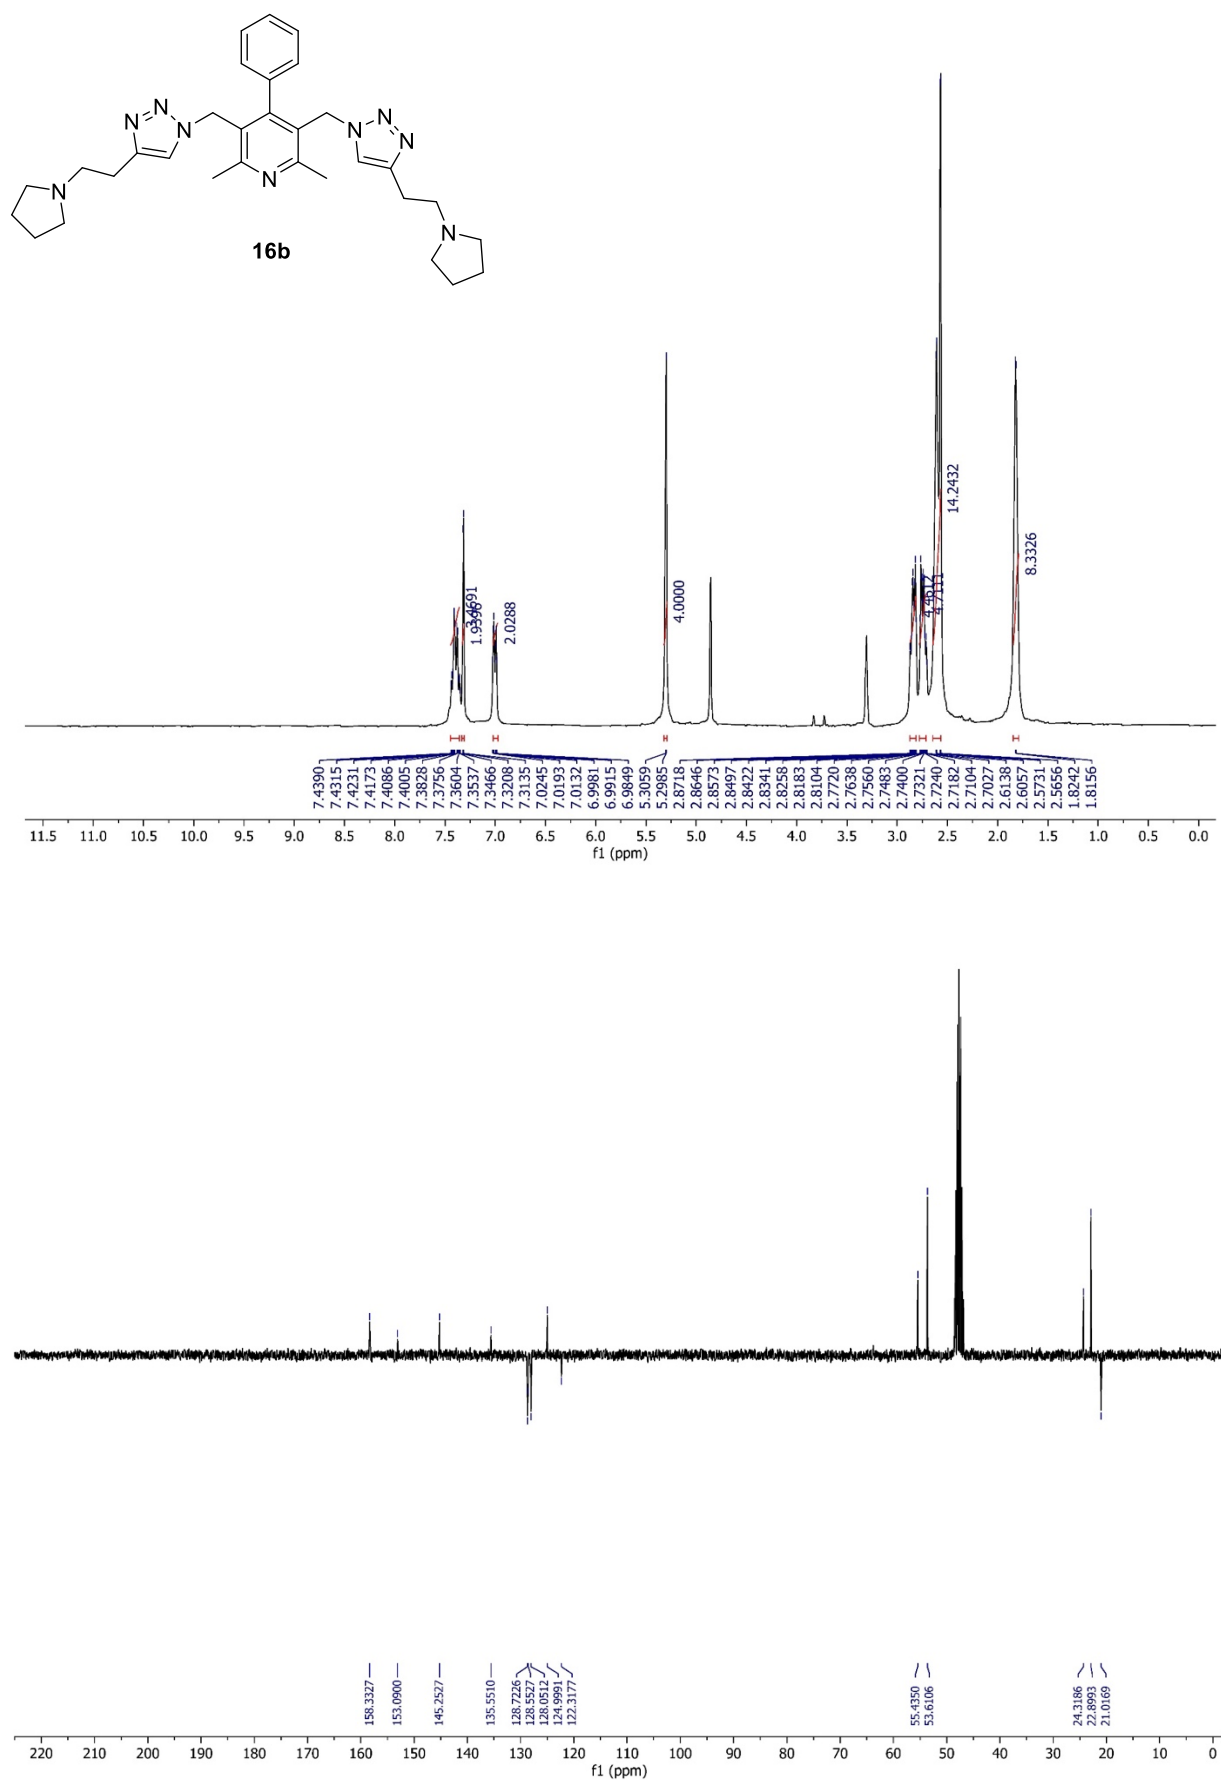

**Figure S29.** 1D <sup>1</sup>H (top) and <sup>13</sup>C APT (bottom) NMR spectra of compound **16b**.

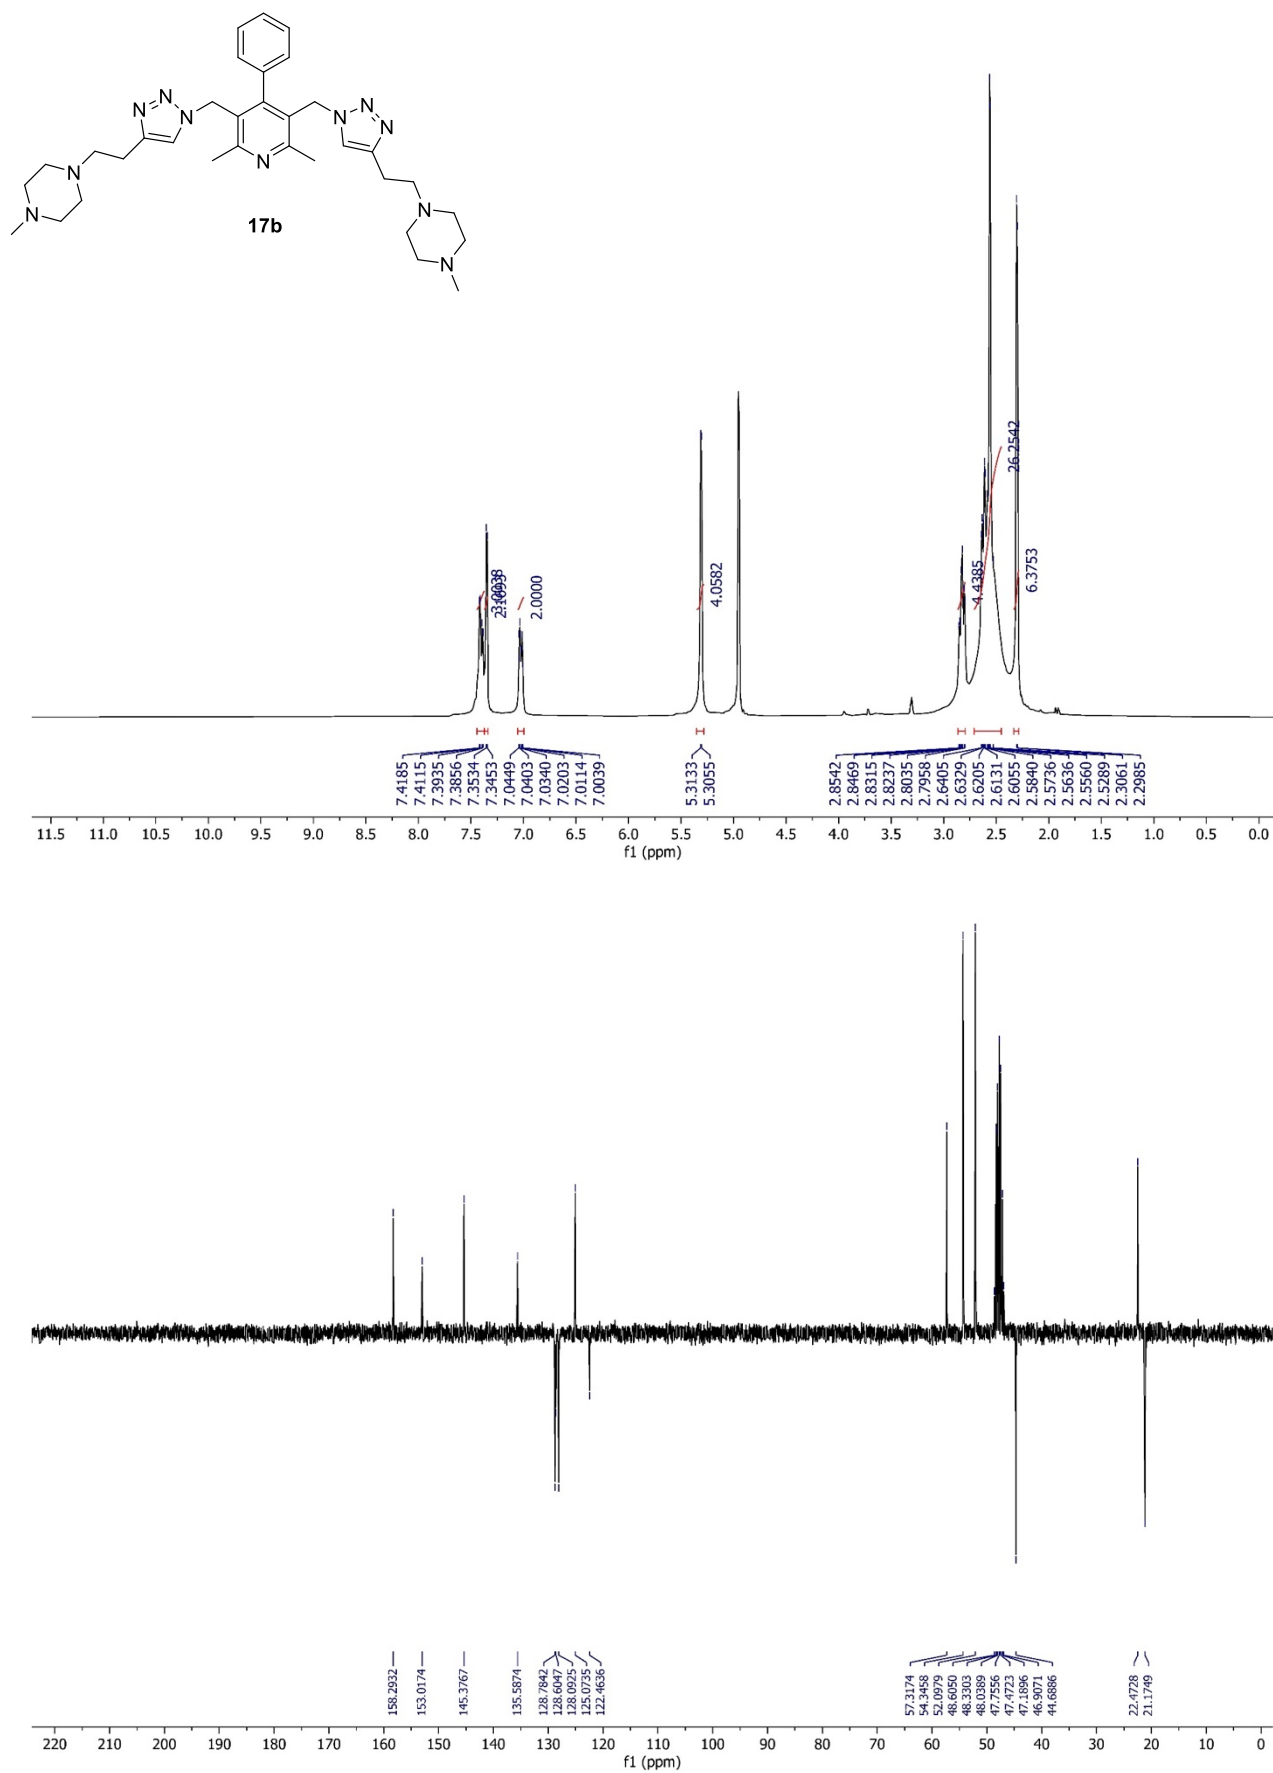

Figure S30. 1D  $^1\text{H}$  (top) and  $^{13}\text{C}$  APT (bottom) NMR spectra of compound **17b**.

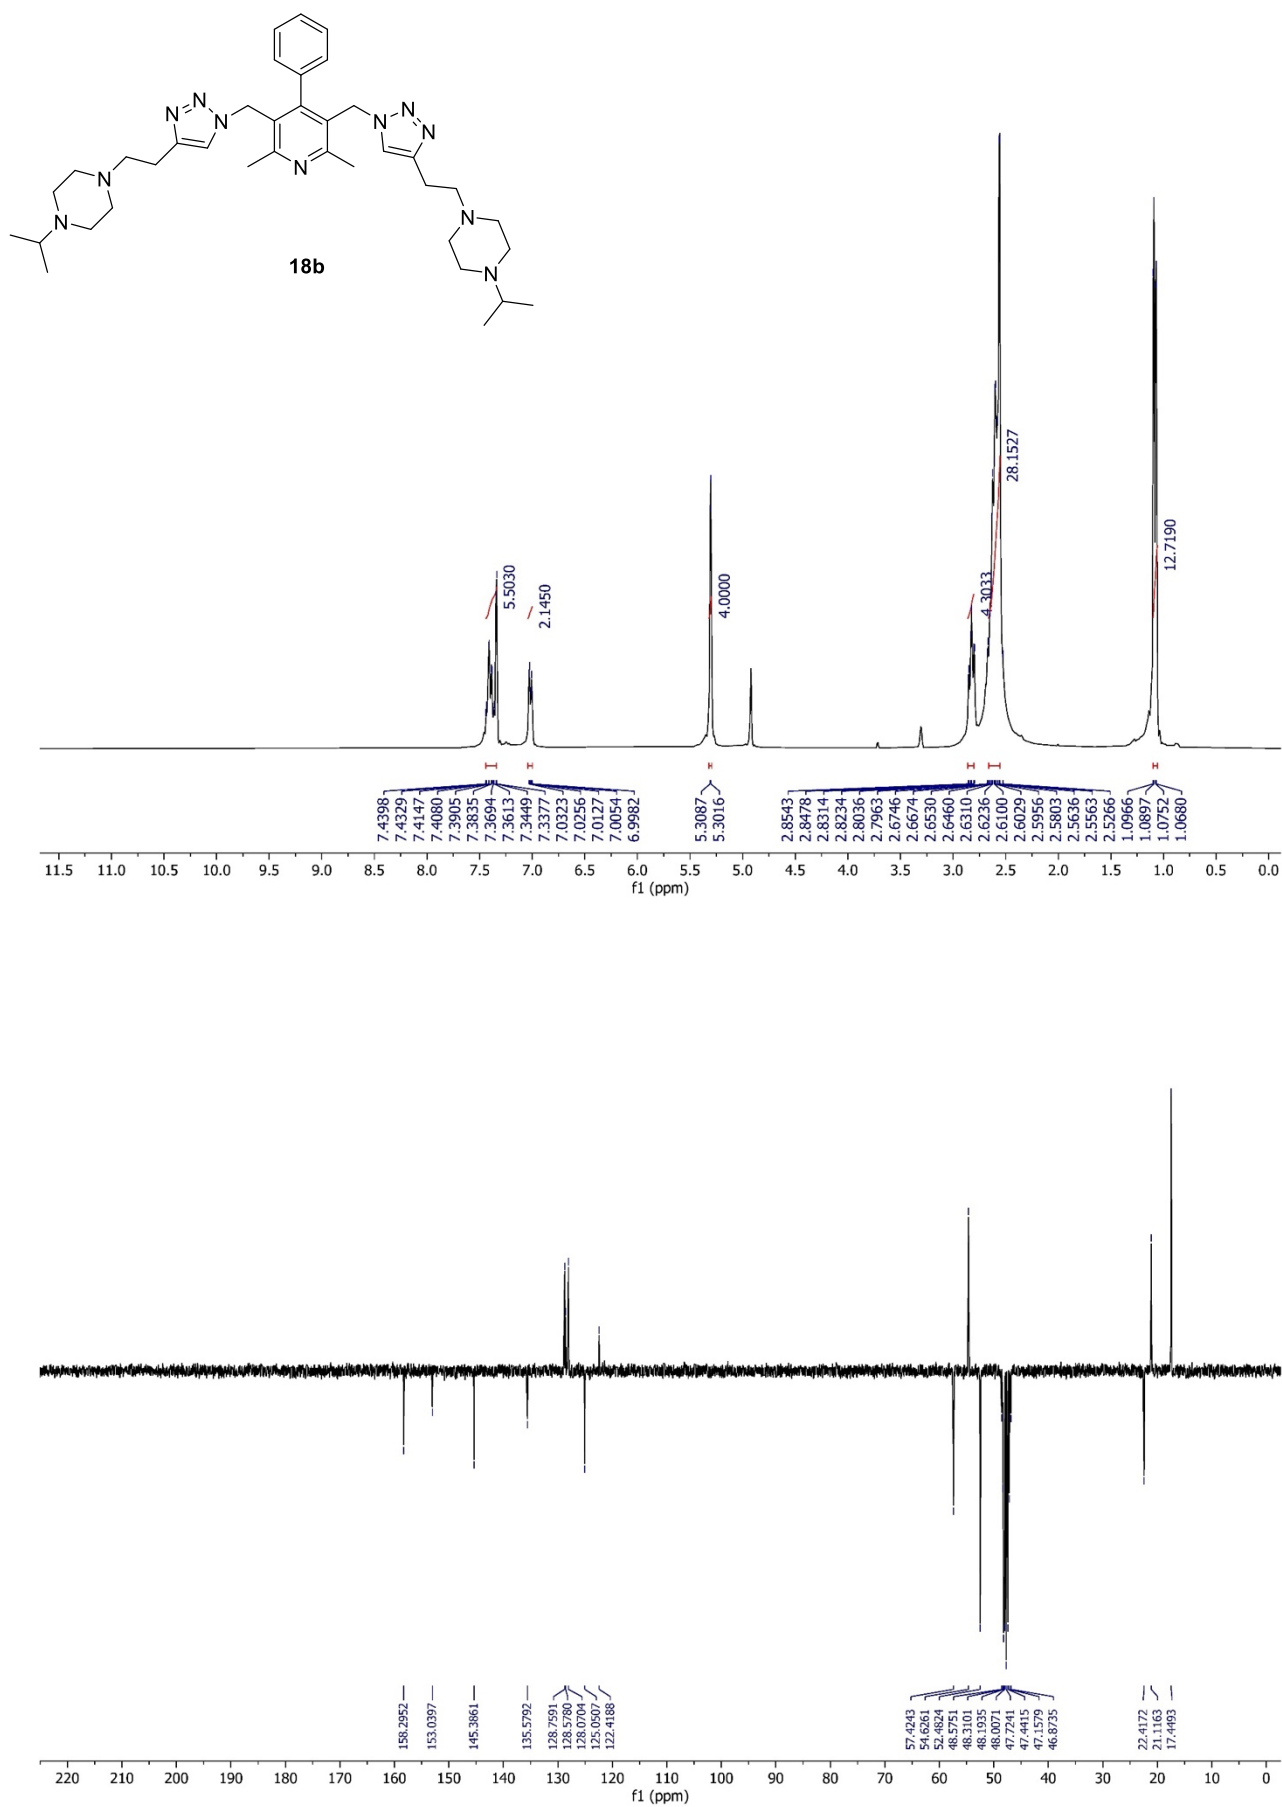

**Figure S31.** 1D  $^1\text{H}$  (top) and  $^{13}\text{C}$  APT (bottom) NMR spectra of compound **18b**.

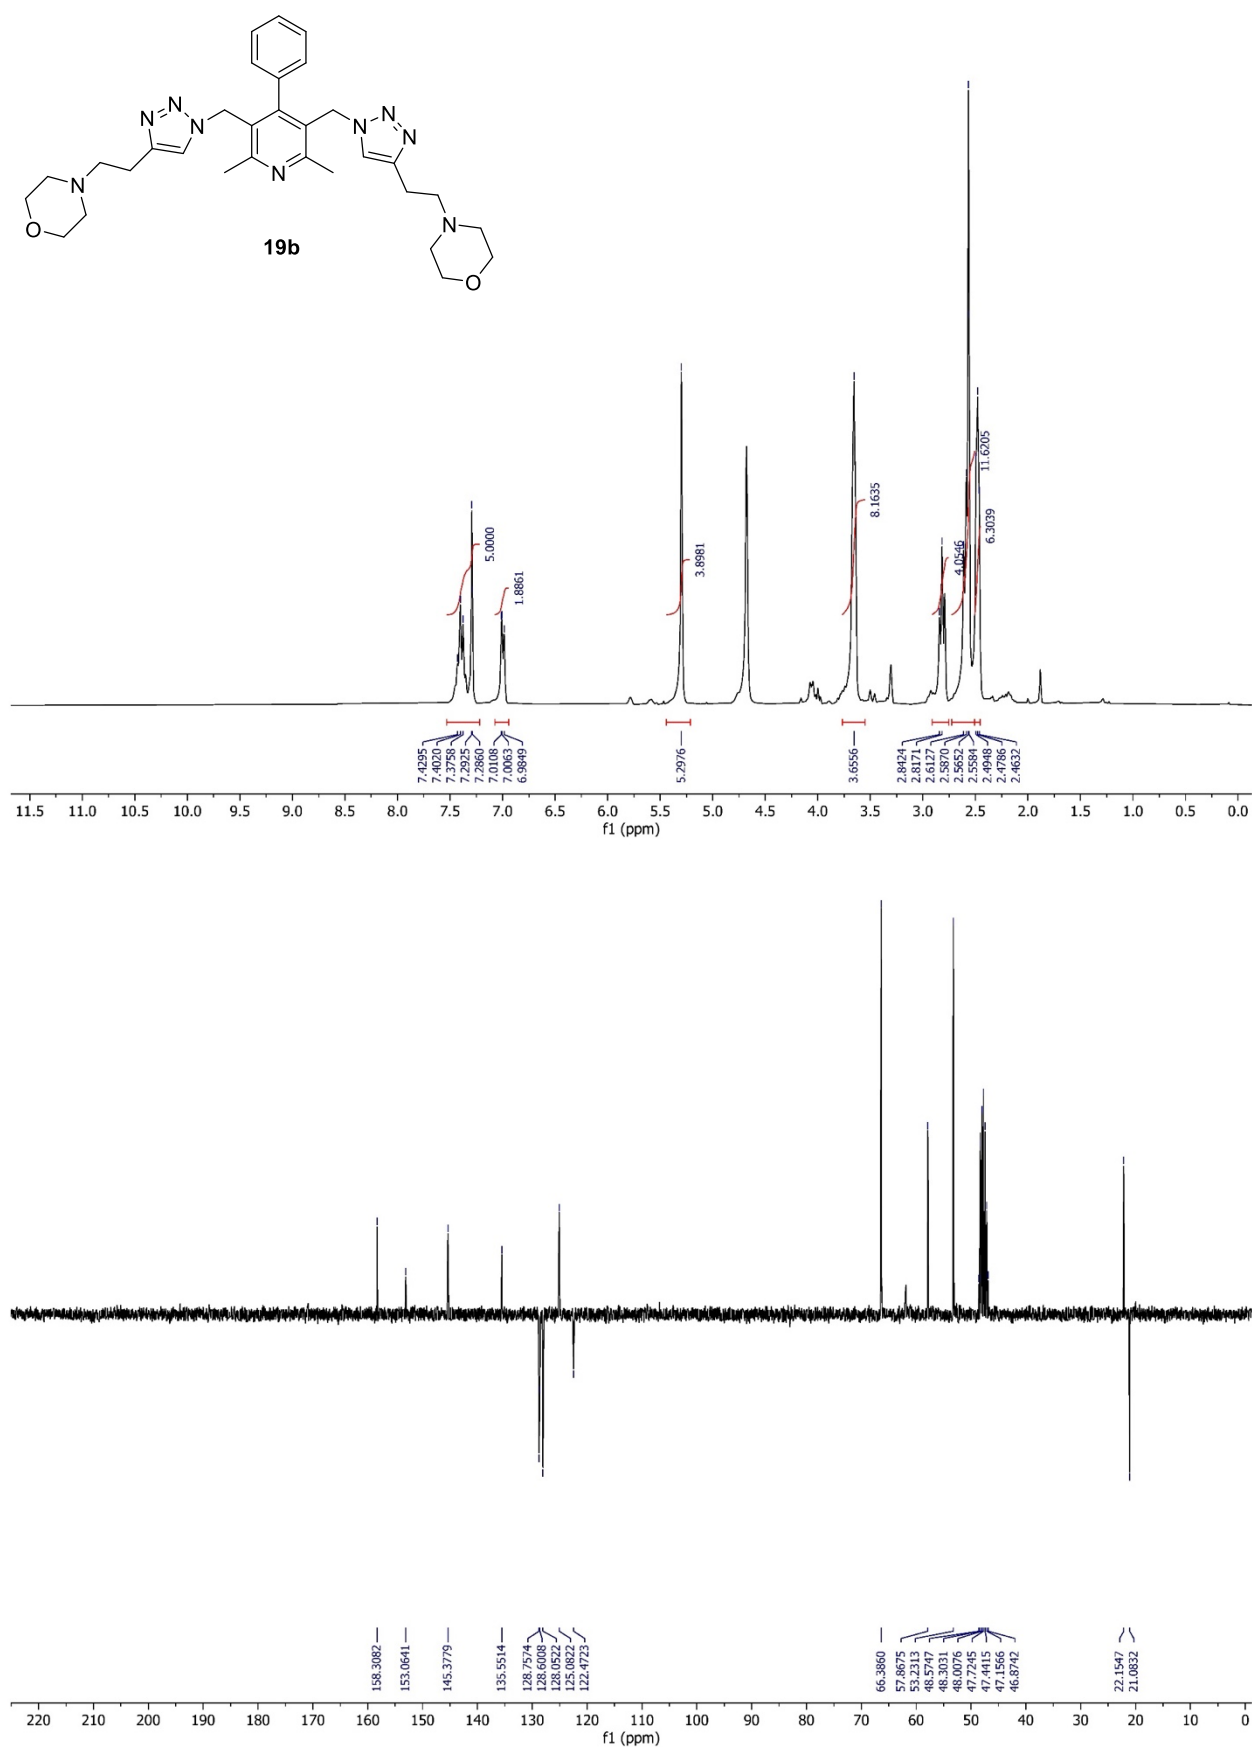

**Figure S32.** 1D <sup>1</sup>H (top) and <sup>13</sup>C APT (bottom) NMR spectra of compound **19b**.

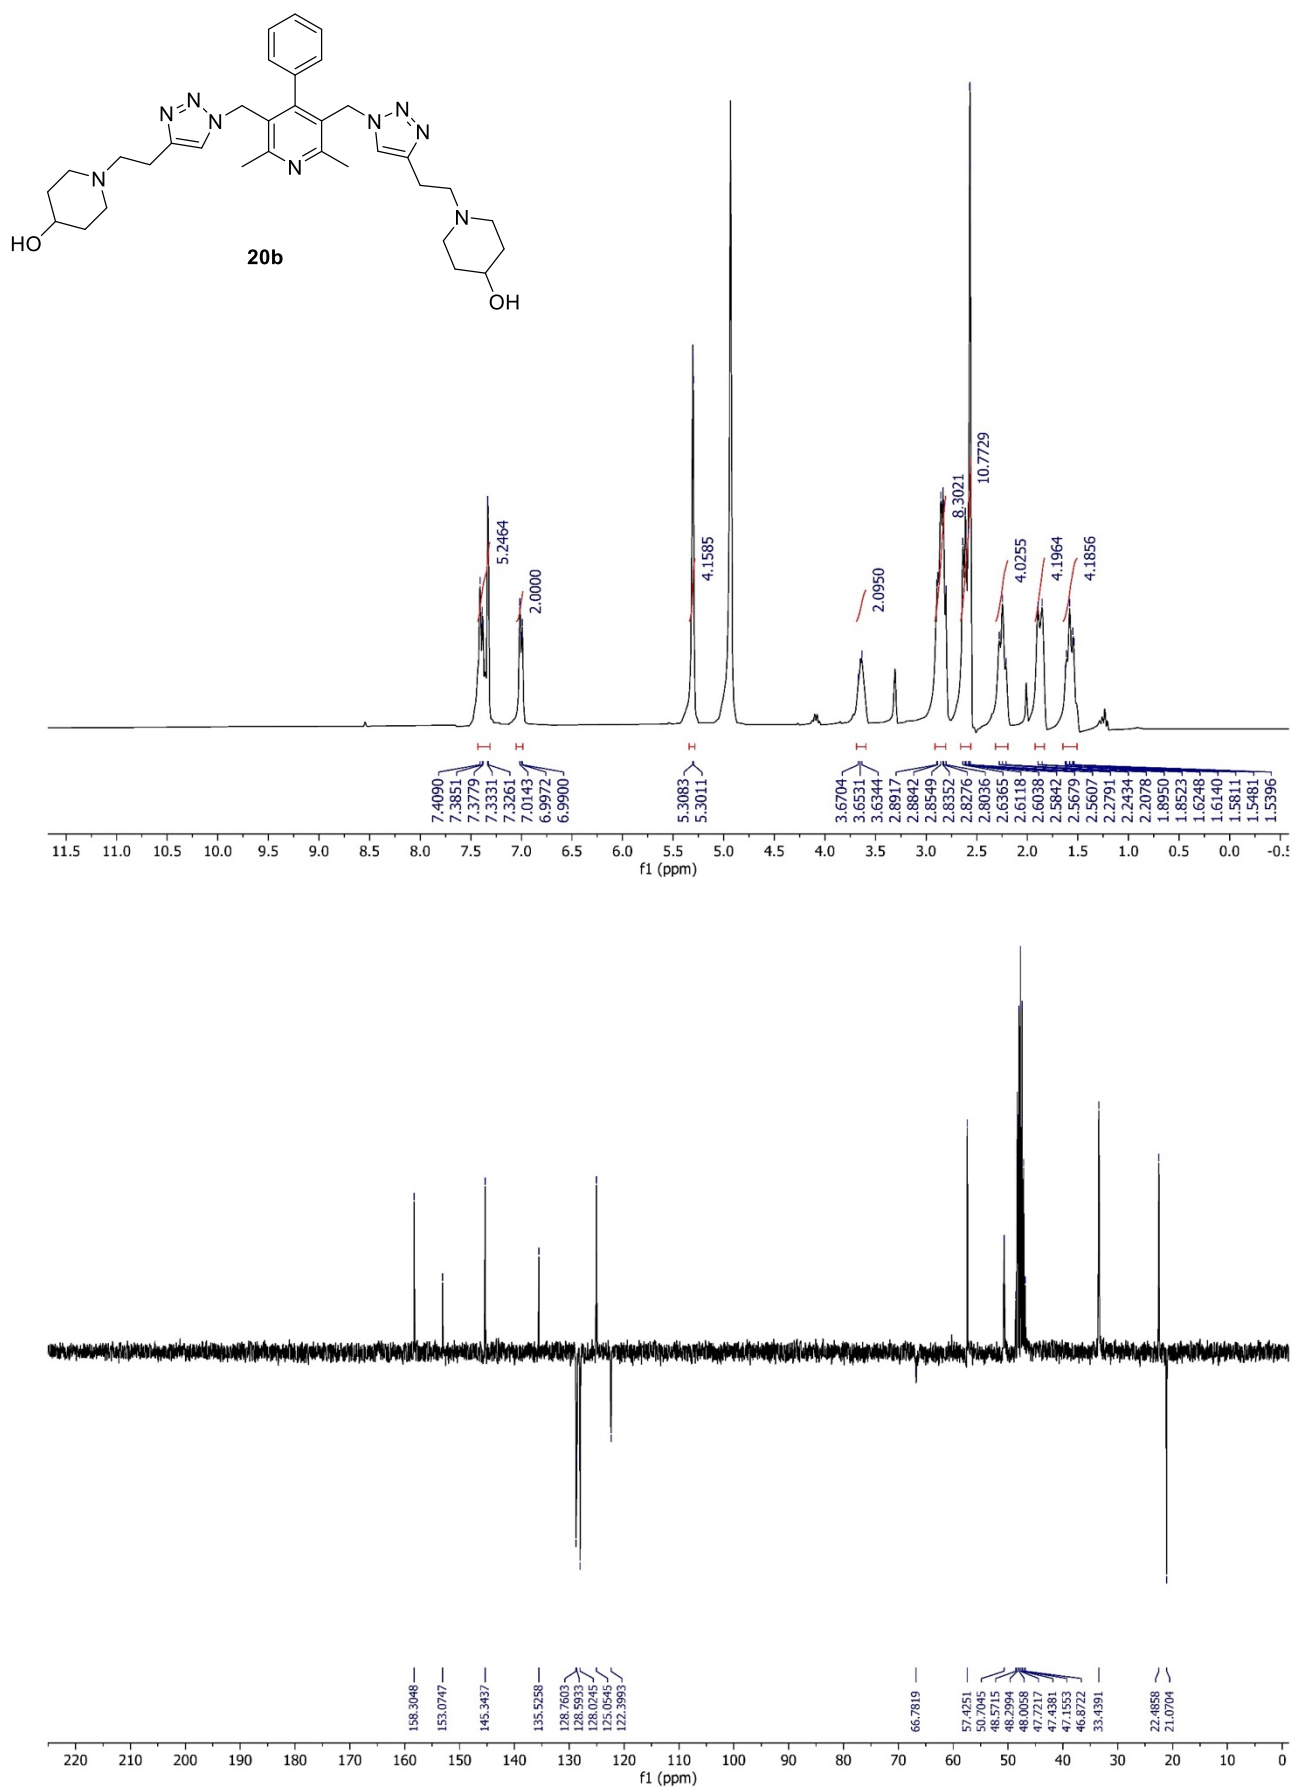

**Figure S33.**  $1\text{D } ^1\text{H}$  (top) and  $^{13}\text{C}$  APT (bottom) NMR spectra of compound **20b**.

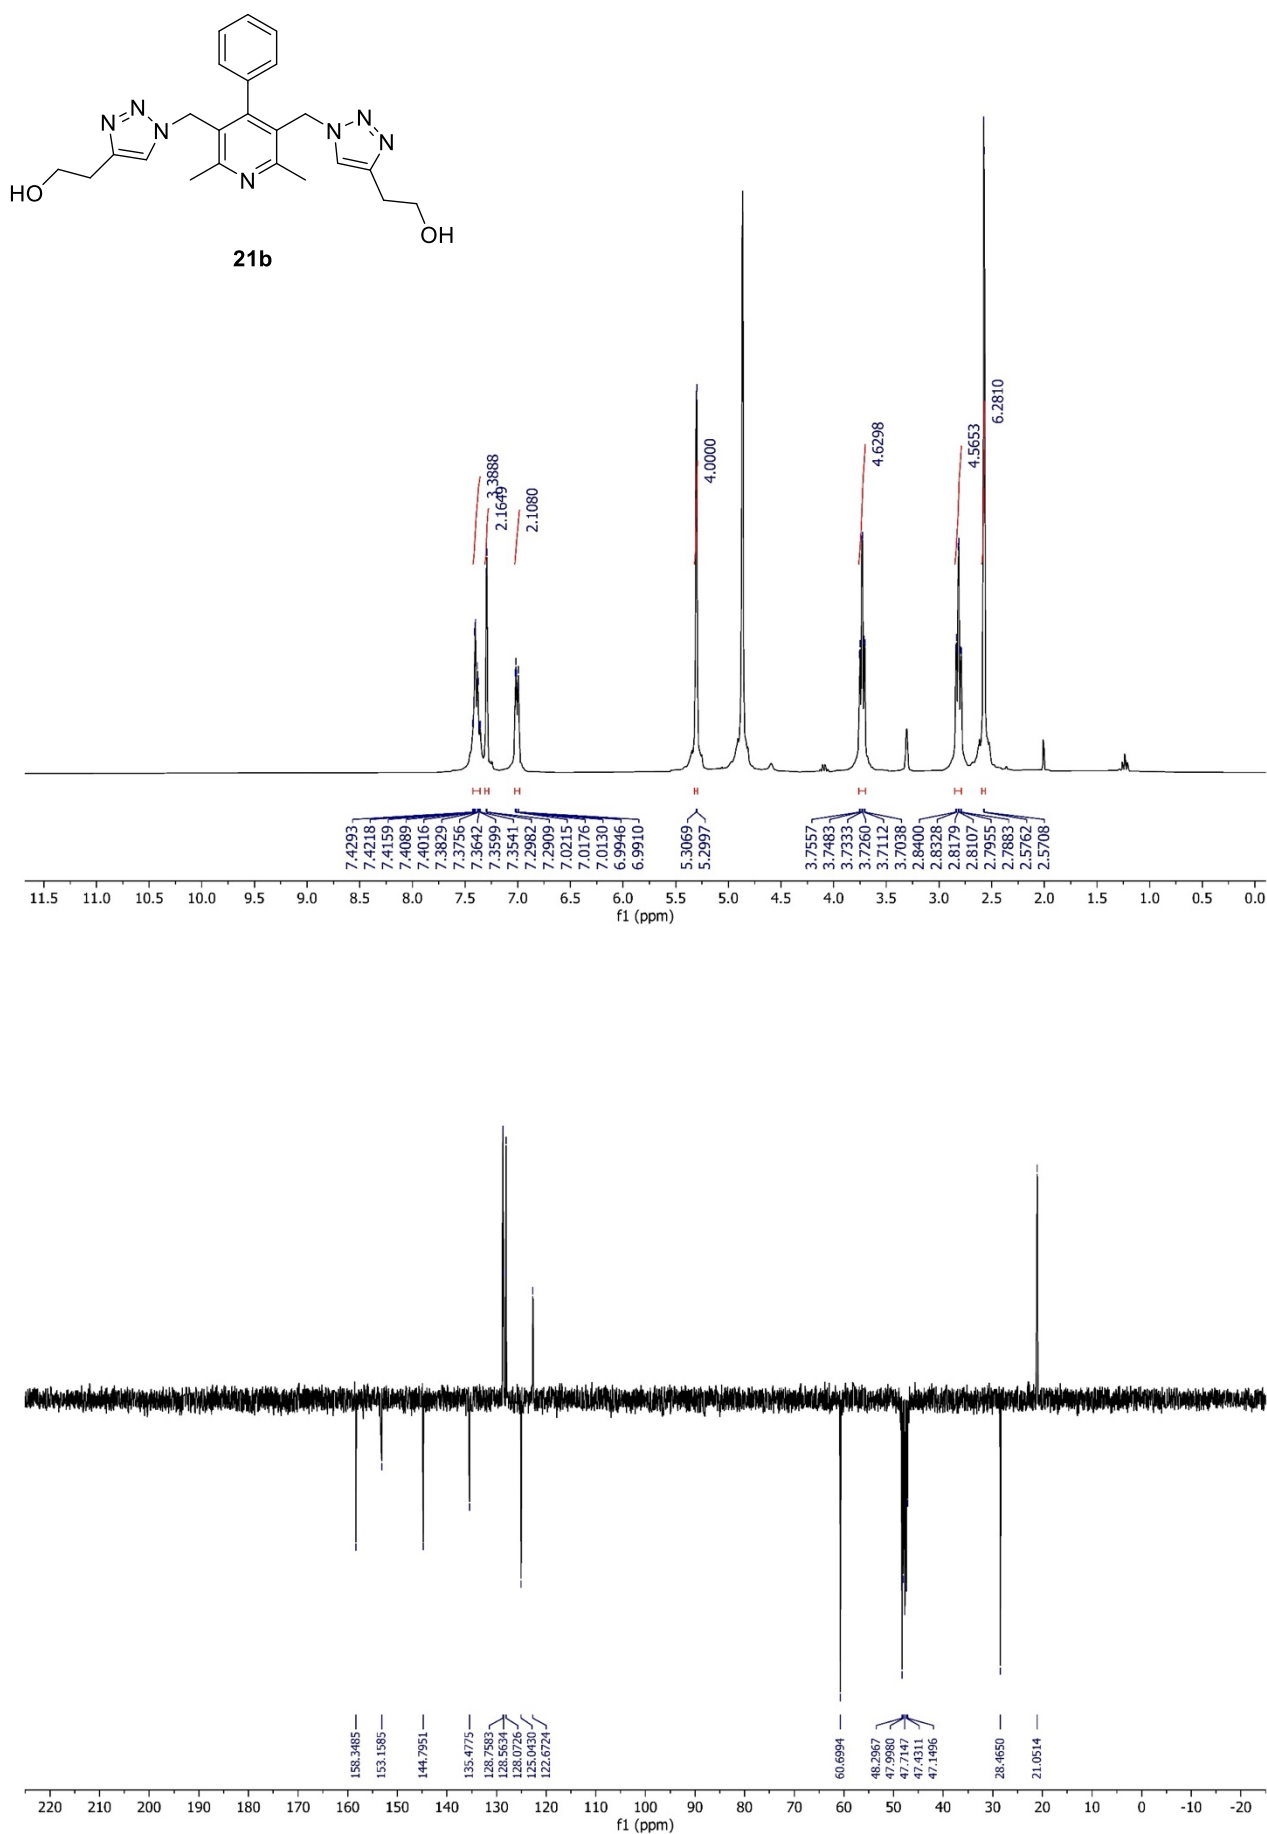

**Figure S34.** 1D <sup>1</sup>H (top) and <sup>13</sup>C APT (bottom) NMR spectra of compound **21b**.



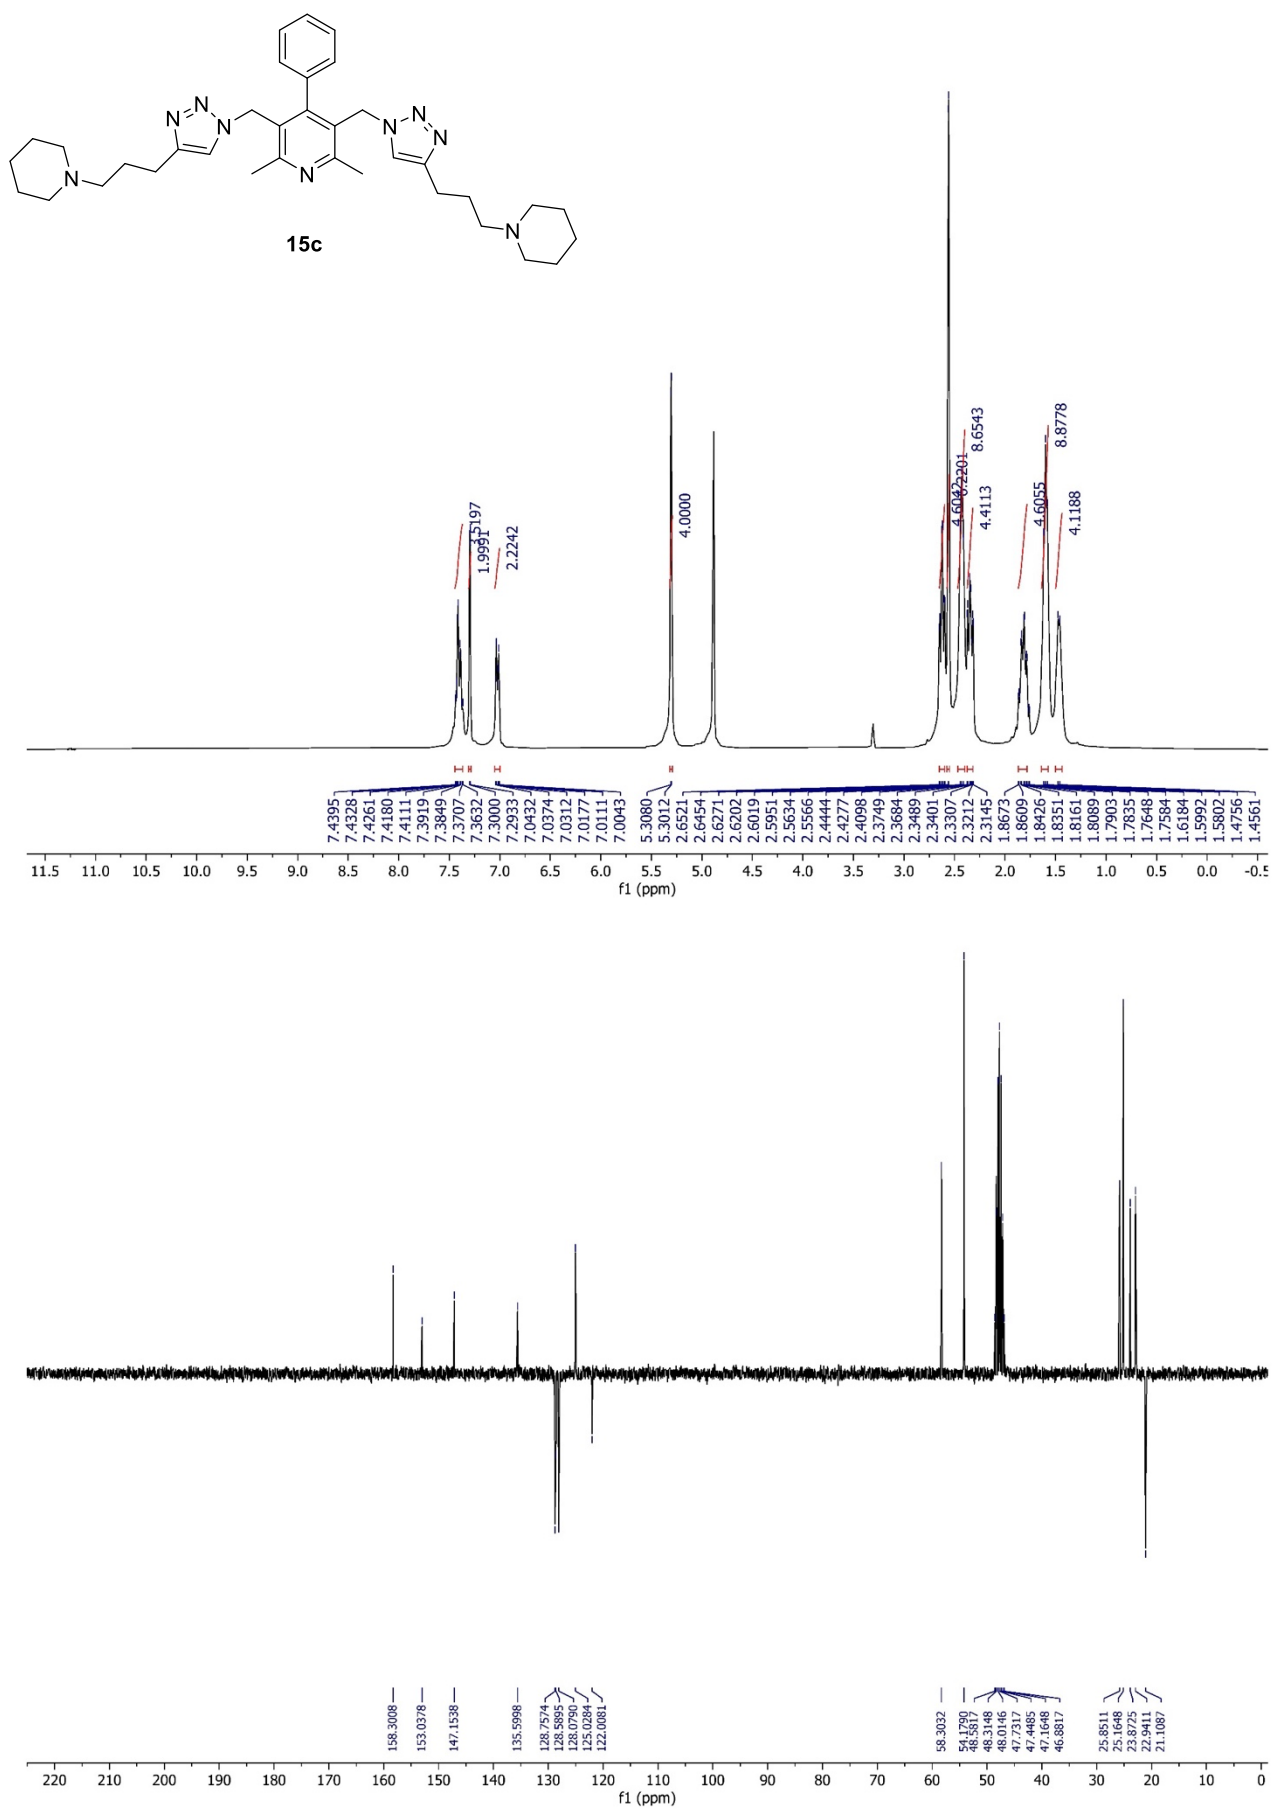

**Figure S35.** 1D <sup>1</sup>H (top) and <sup>13</sup>C APT (bottom) NMR spectra of compound **15c**.

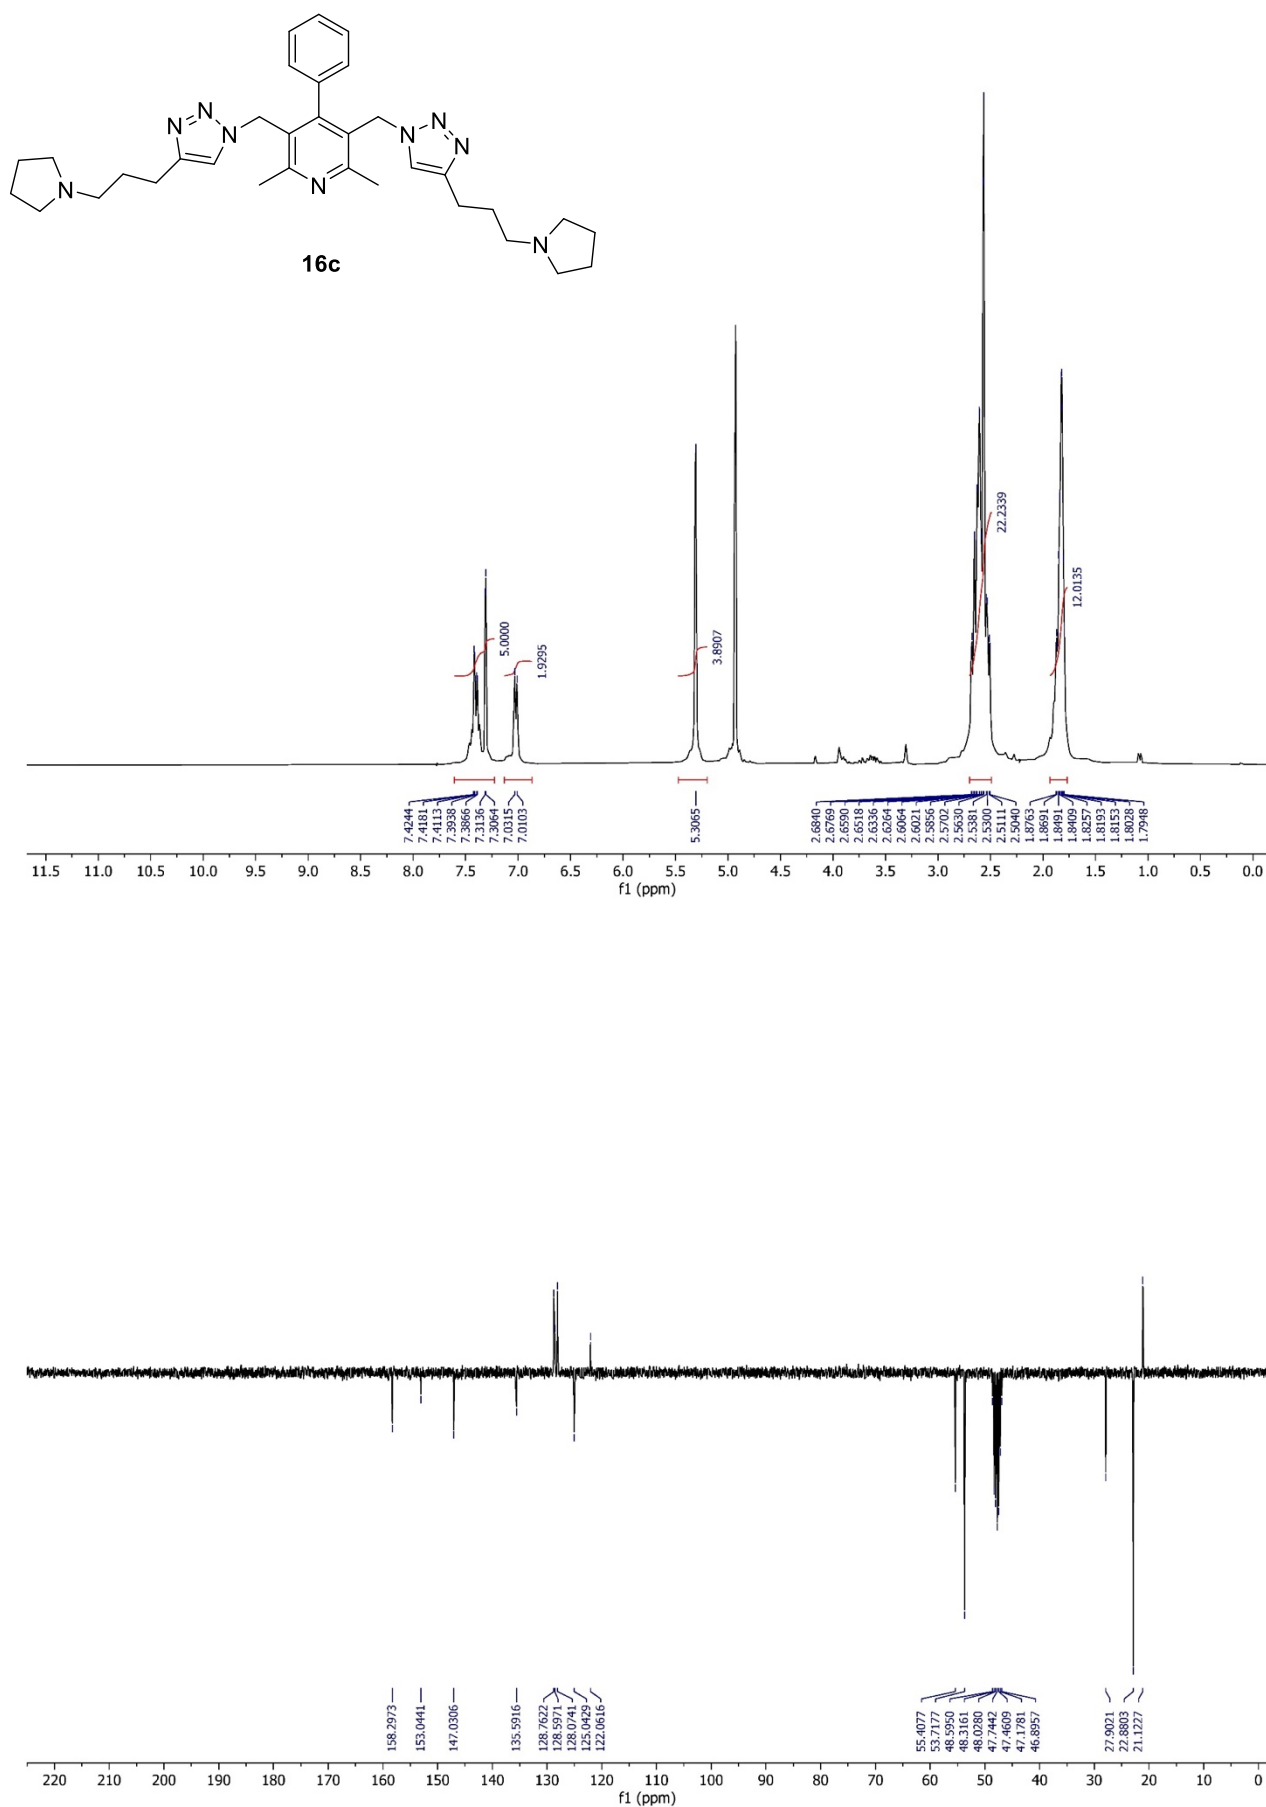

**Figure S36.** 1D <sup>1</sup>H (top) and <sup>13</sup>C APT (bottom) NMR spectra of compound **16c**.

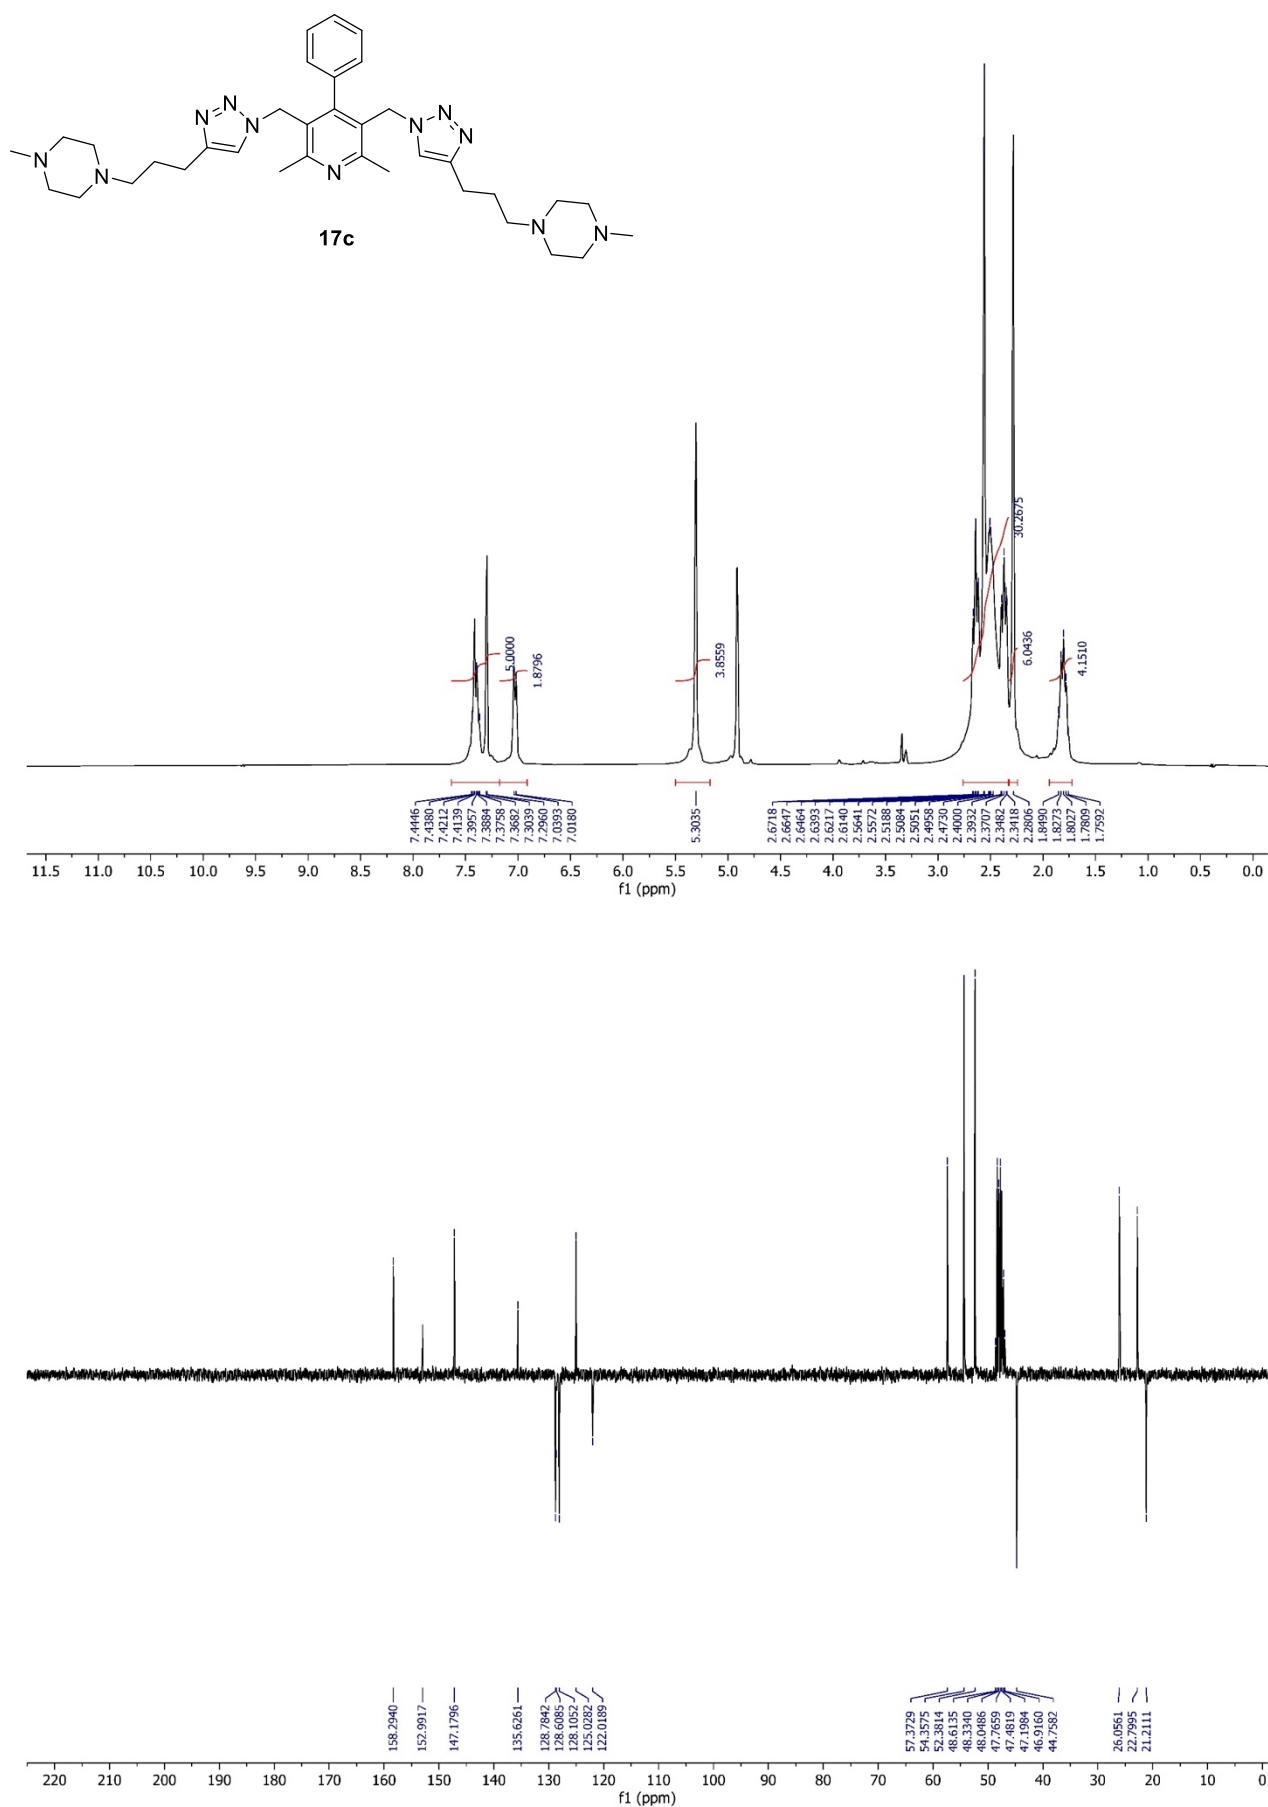

Figure S37.  $1\text{D } ^1\text{H}$  (top) and  $^{13}\text{C}$  APT (bottom) NMR spectra of compound **17c**.

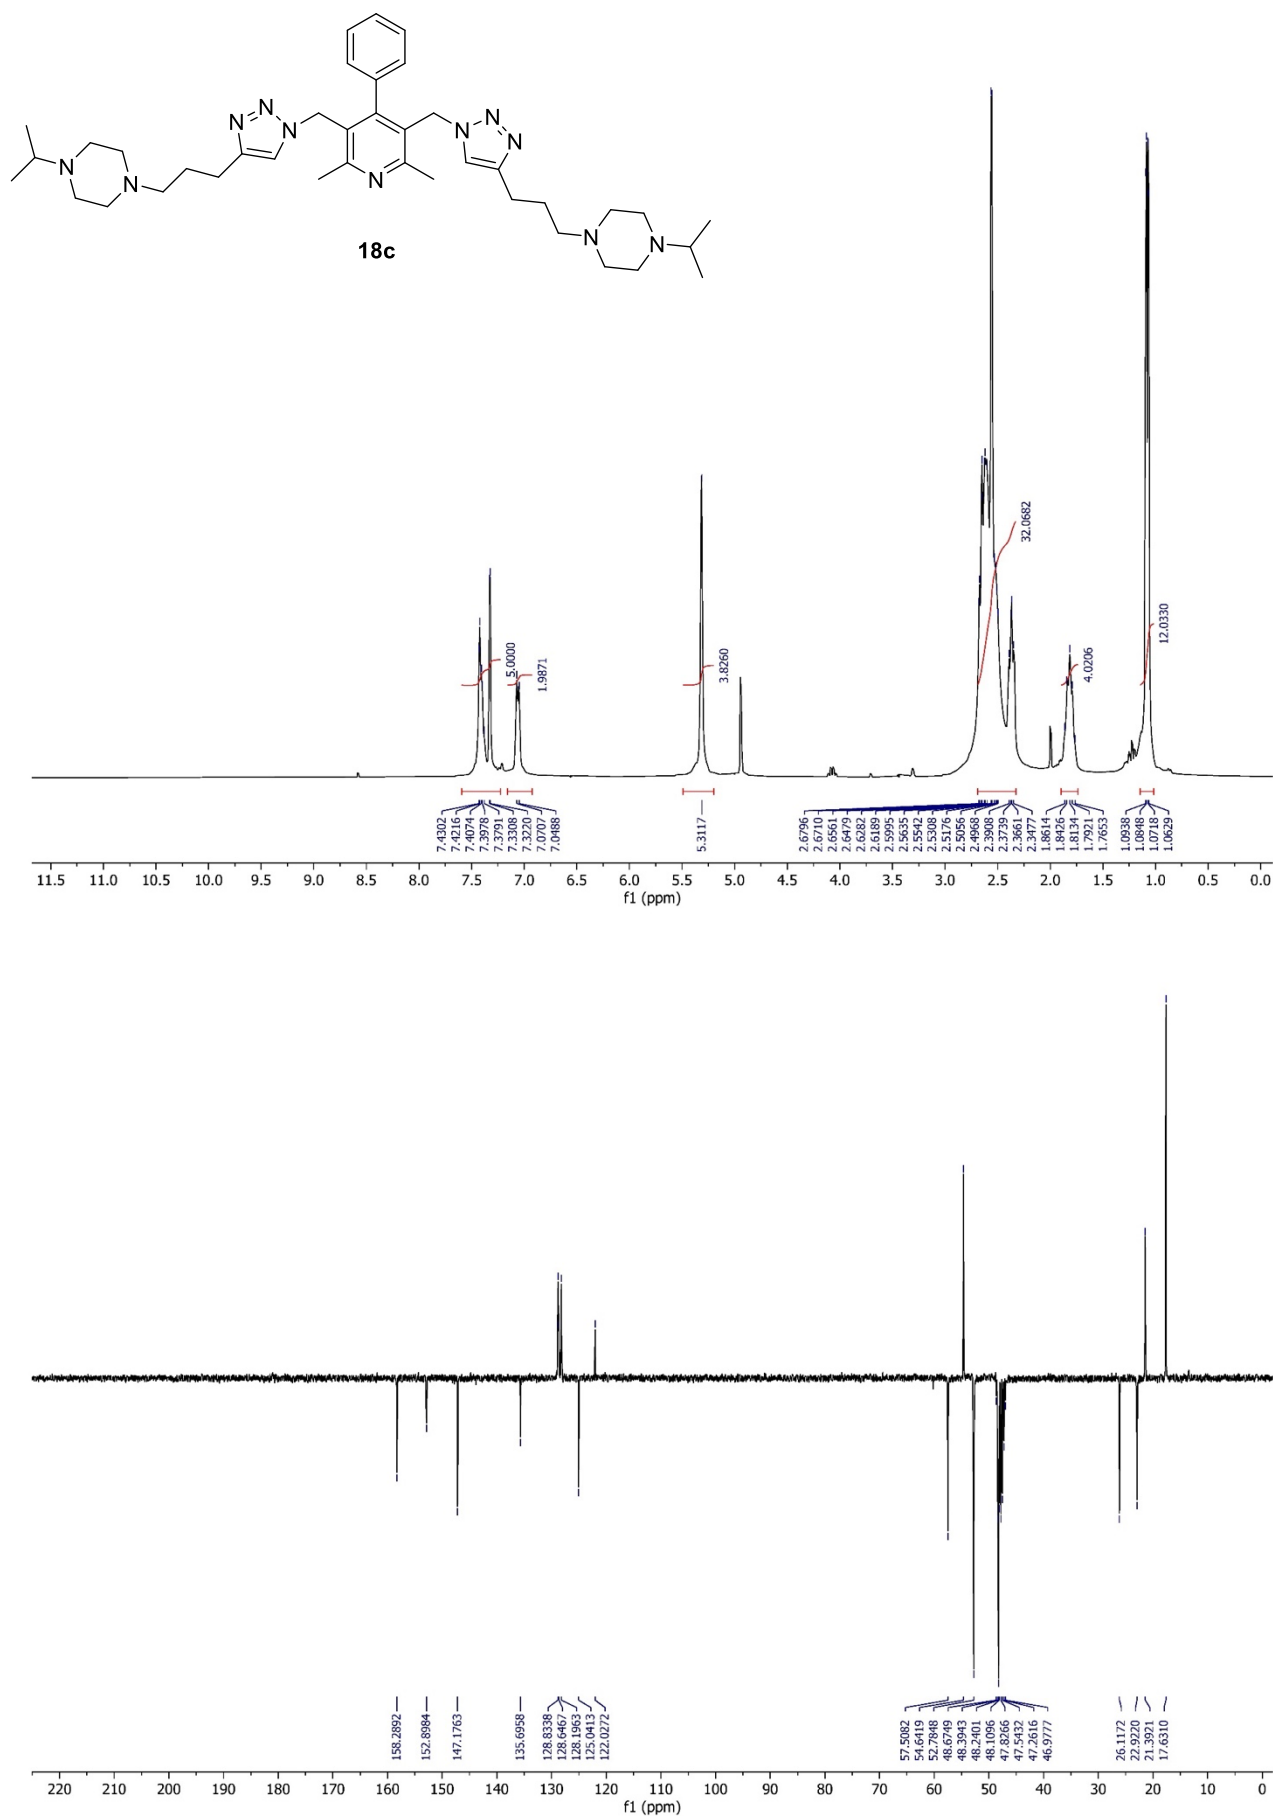

Figure S38.  $1\text{D } ^1\text{H}$  (top) and  $^{13}\text{C}$  APT (bottom) NMR spectra of compound **18c**.

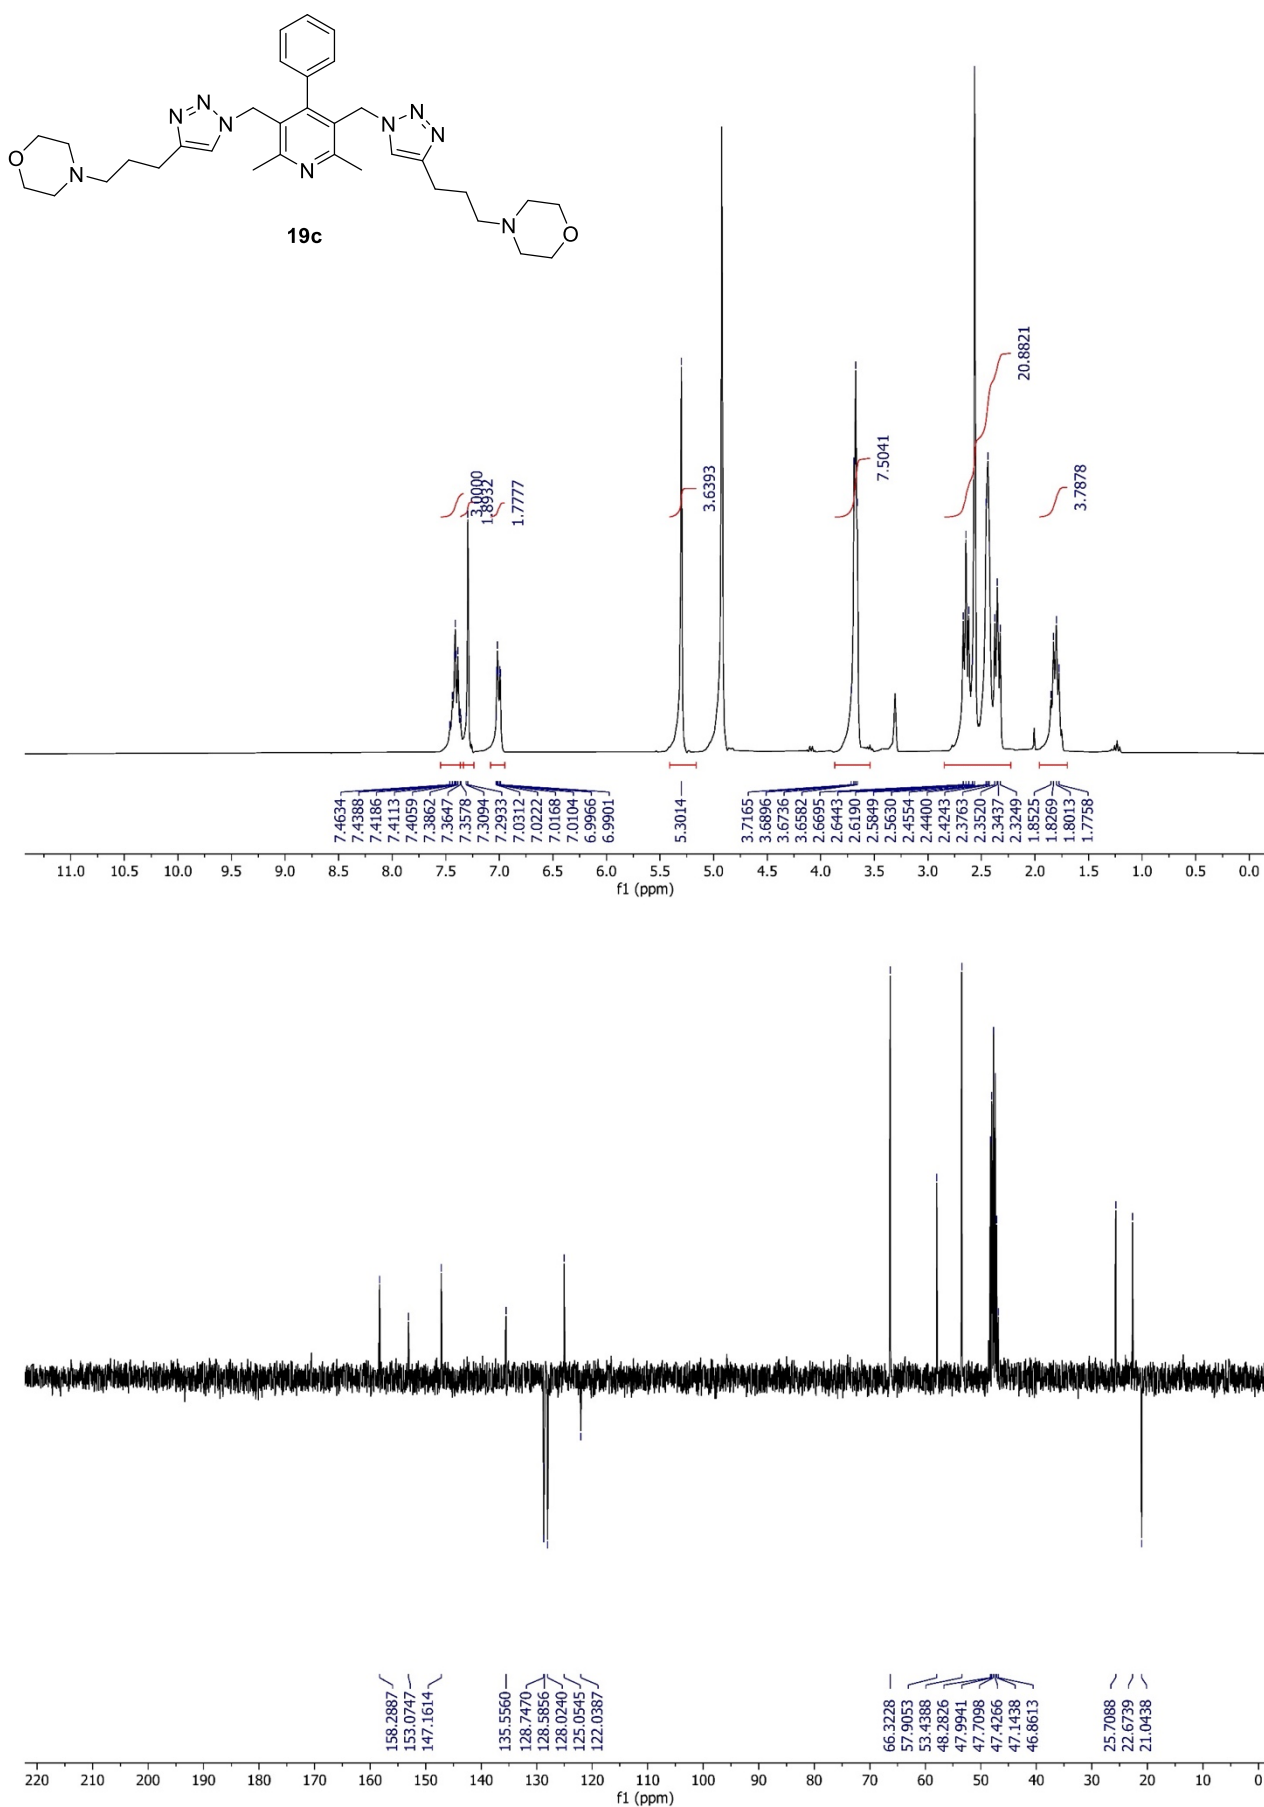

**Figure S39.** 1D <sup>1</sup>H (top) and <sup>13</sup>C APT (bottom) NMR spectra of compound **19c**.

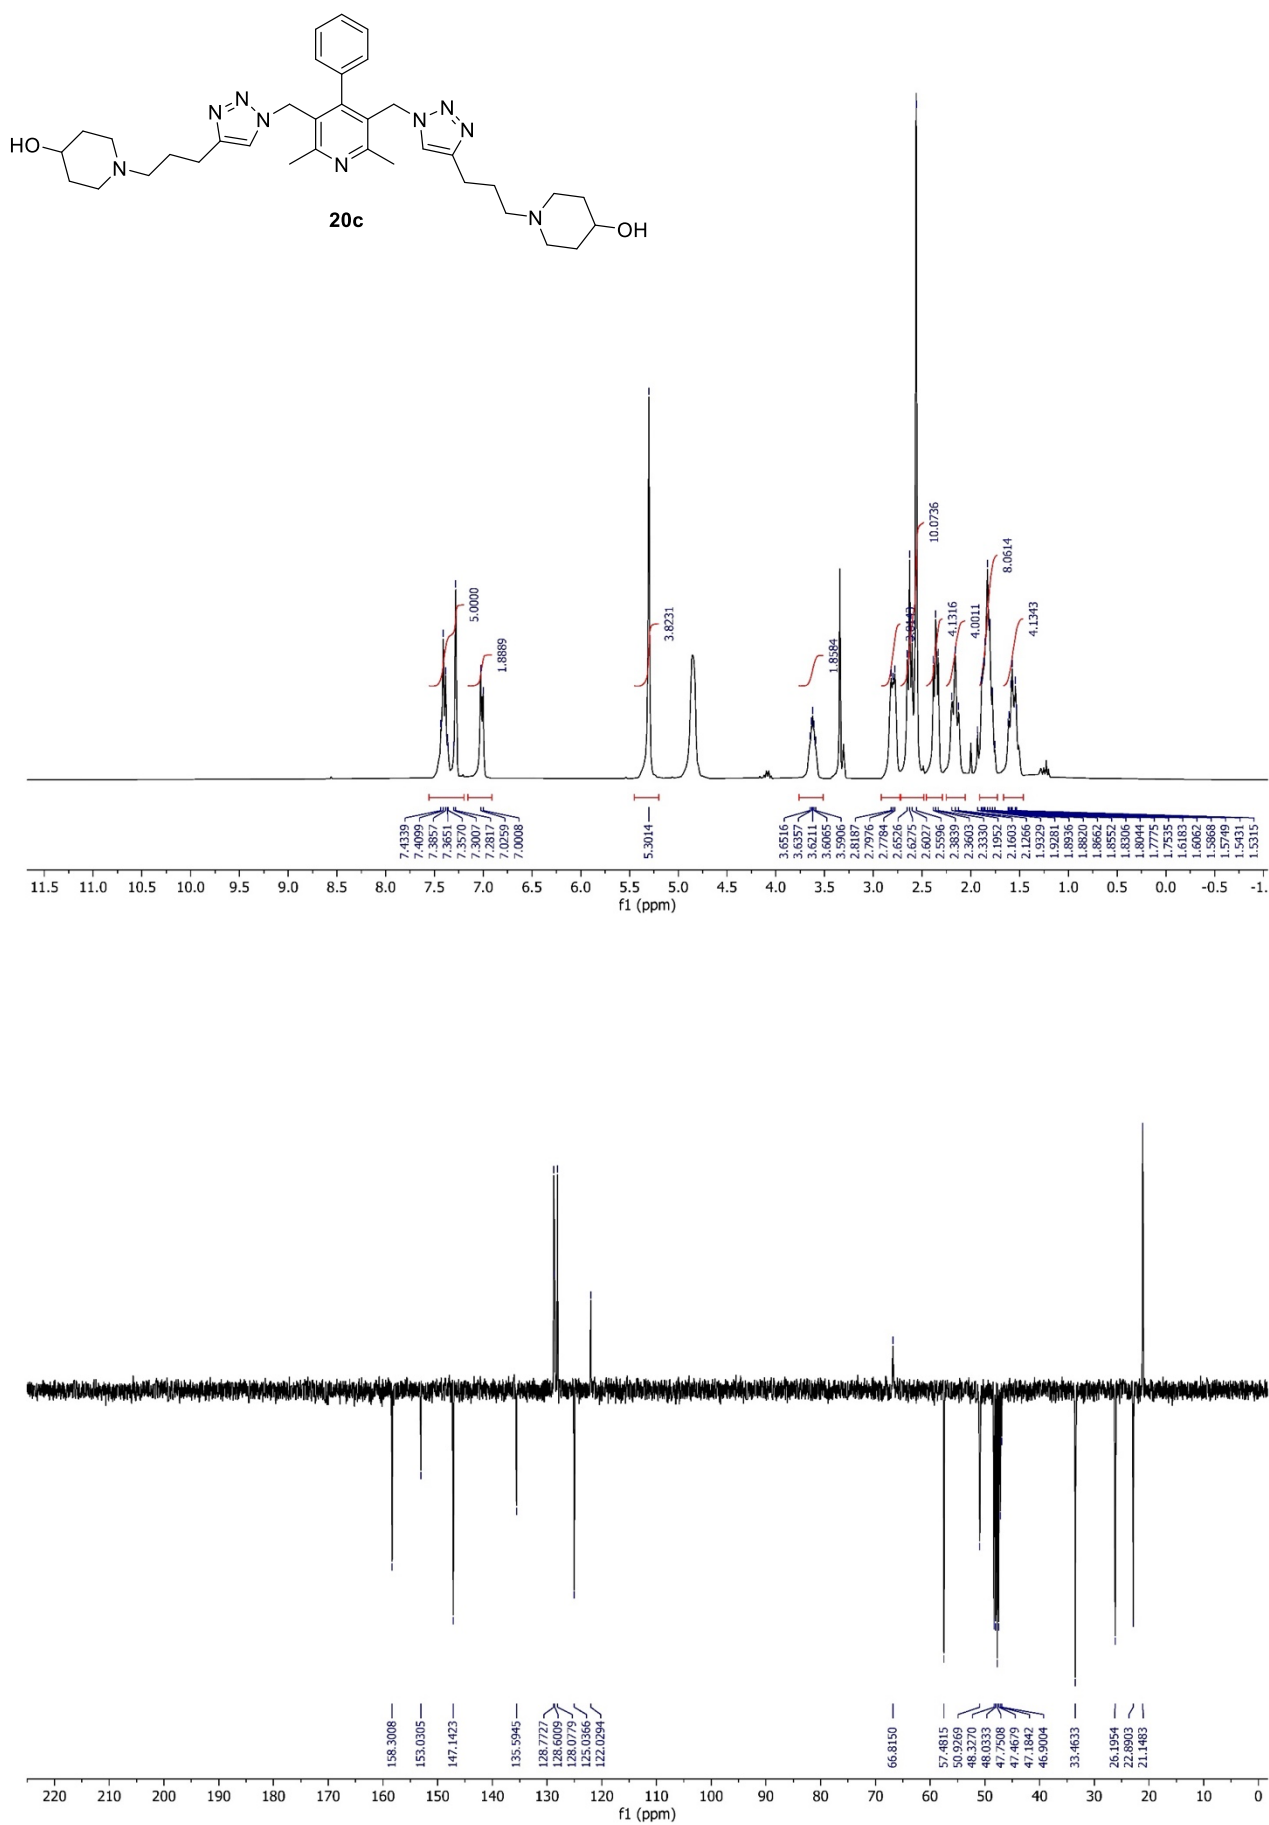

**Figure S40.** 1D <sup>1</sup>H (top) and <sup>13</sup>C APT (bottom) NMR spectra of compound **20c**.

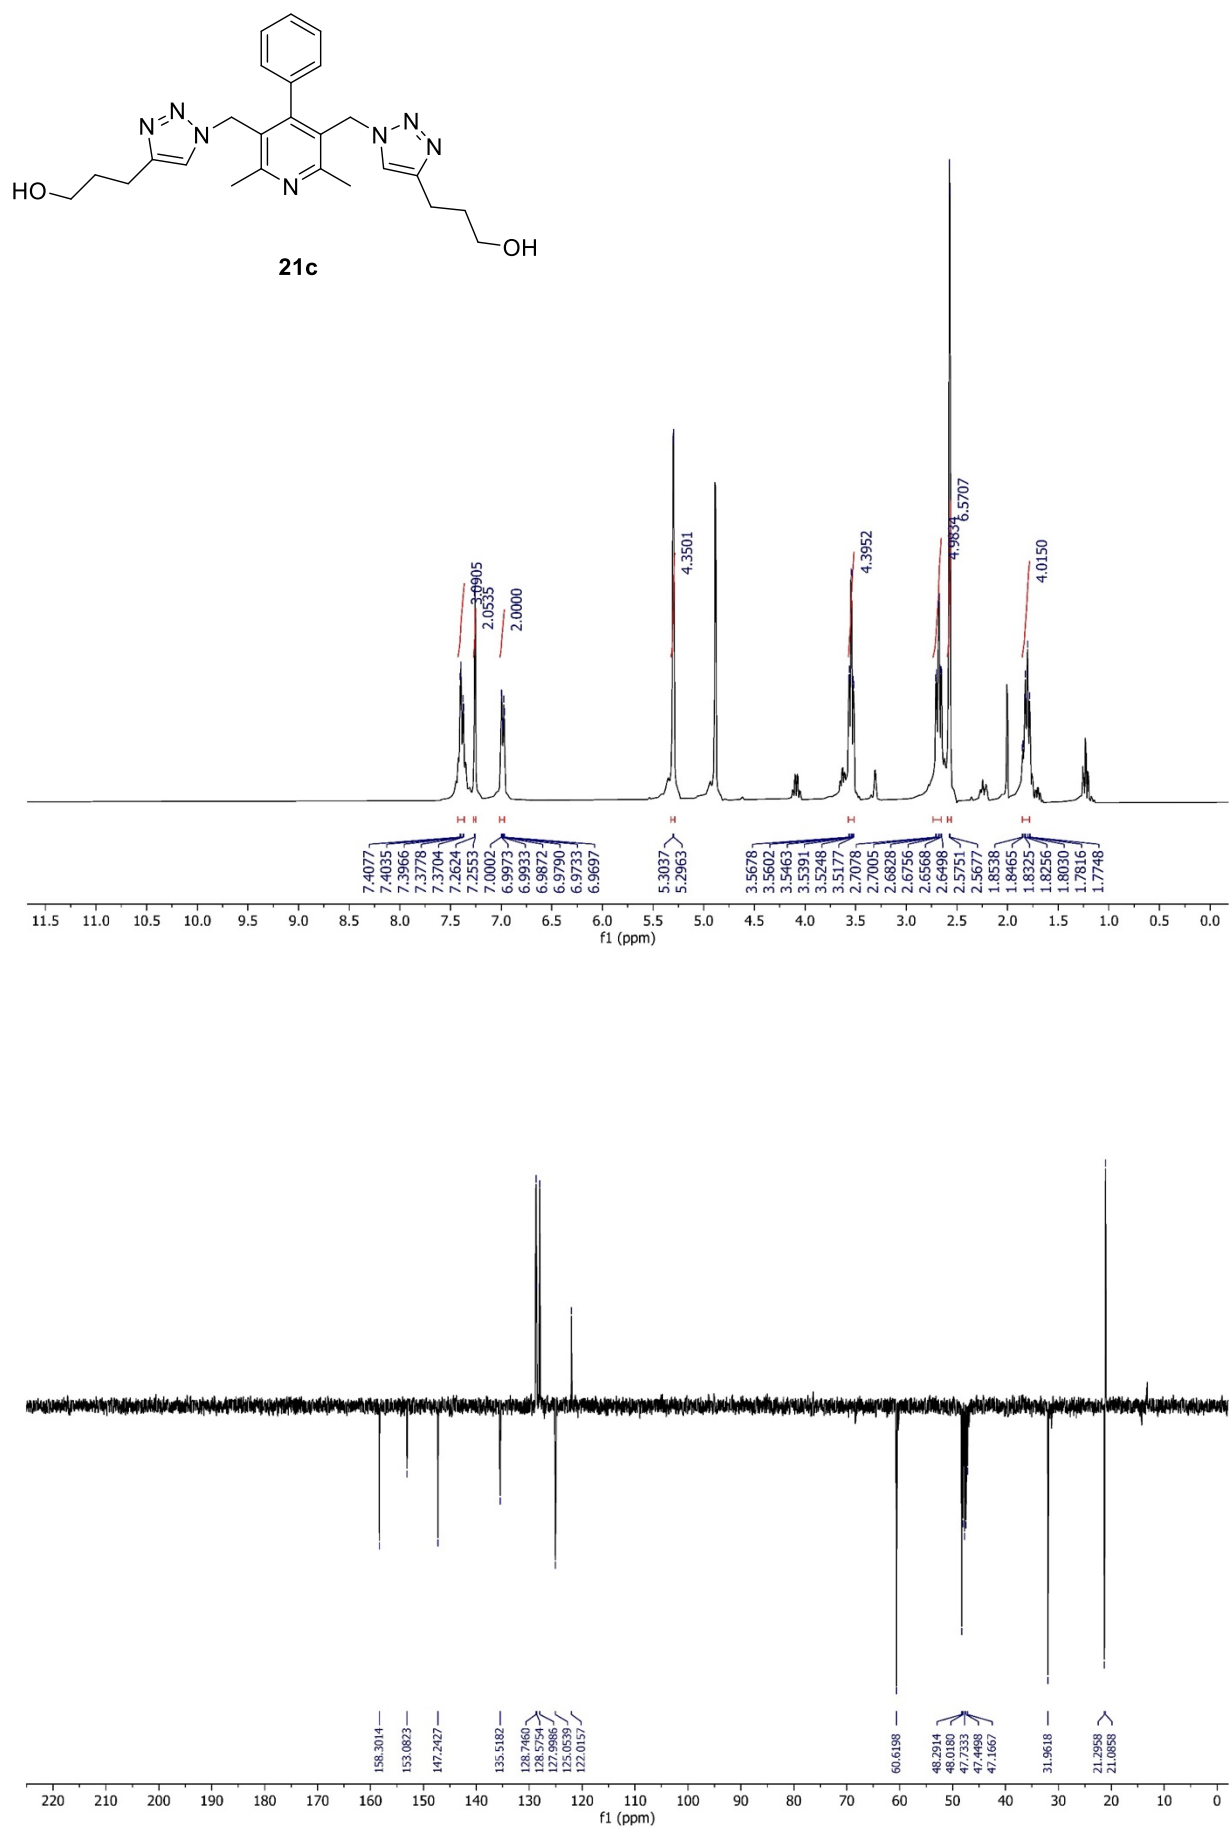

Figure S41.  $1\text{D } ^1\text{H}$  (top) and  $^{13}\text{C}$  APT (bottom) NMR spectra of compound **21c**.

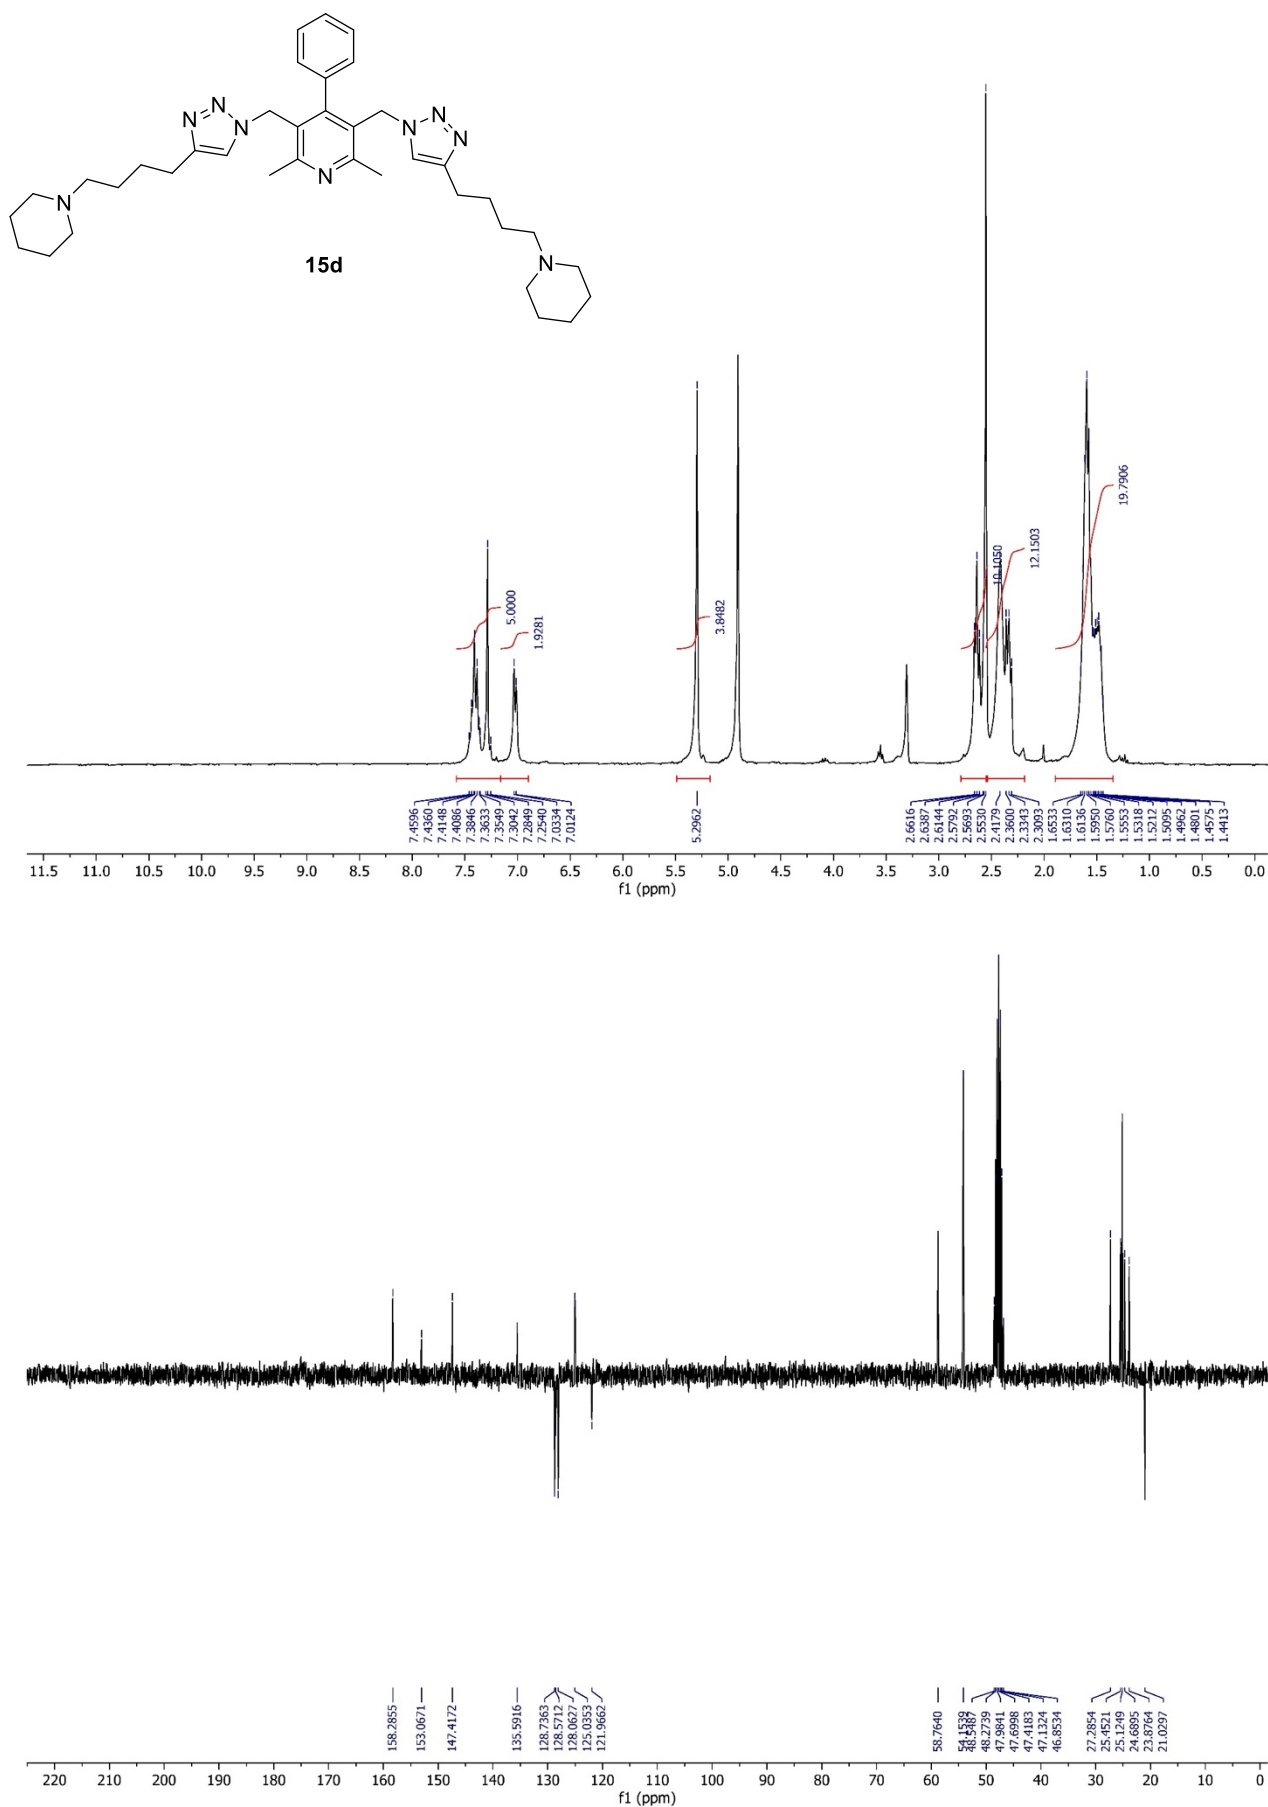

**Figure S42.** 1D  $^1\text{H}$  (top) and  $^{13}\text{C}$  APT (bottom) NMR spectra of compound **15d**.



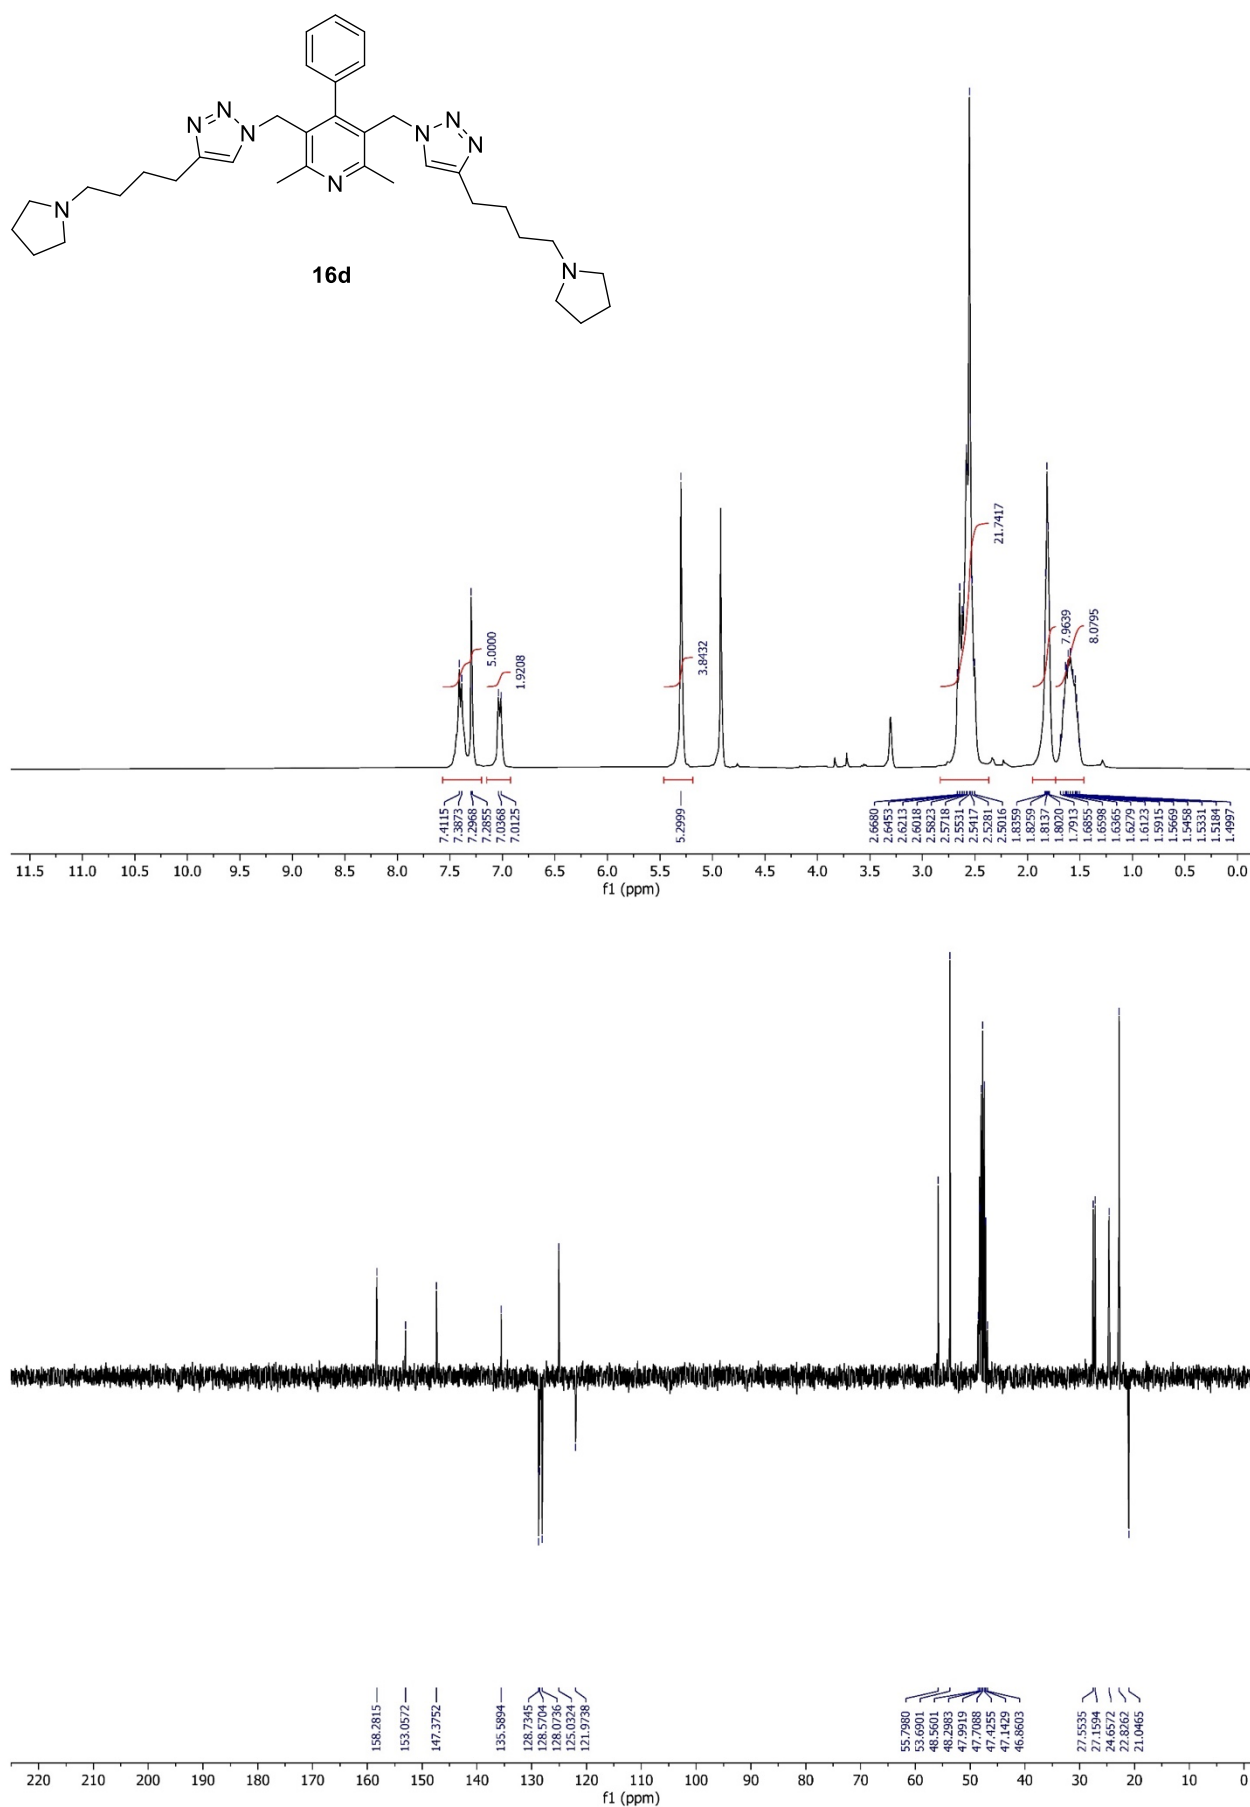

**Figure S43.** 1D <sup>1</sup>H (top) and <sup>13</sup>C APT (bottom) NMR spectra of compound **16d**.

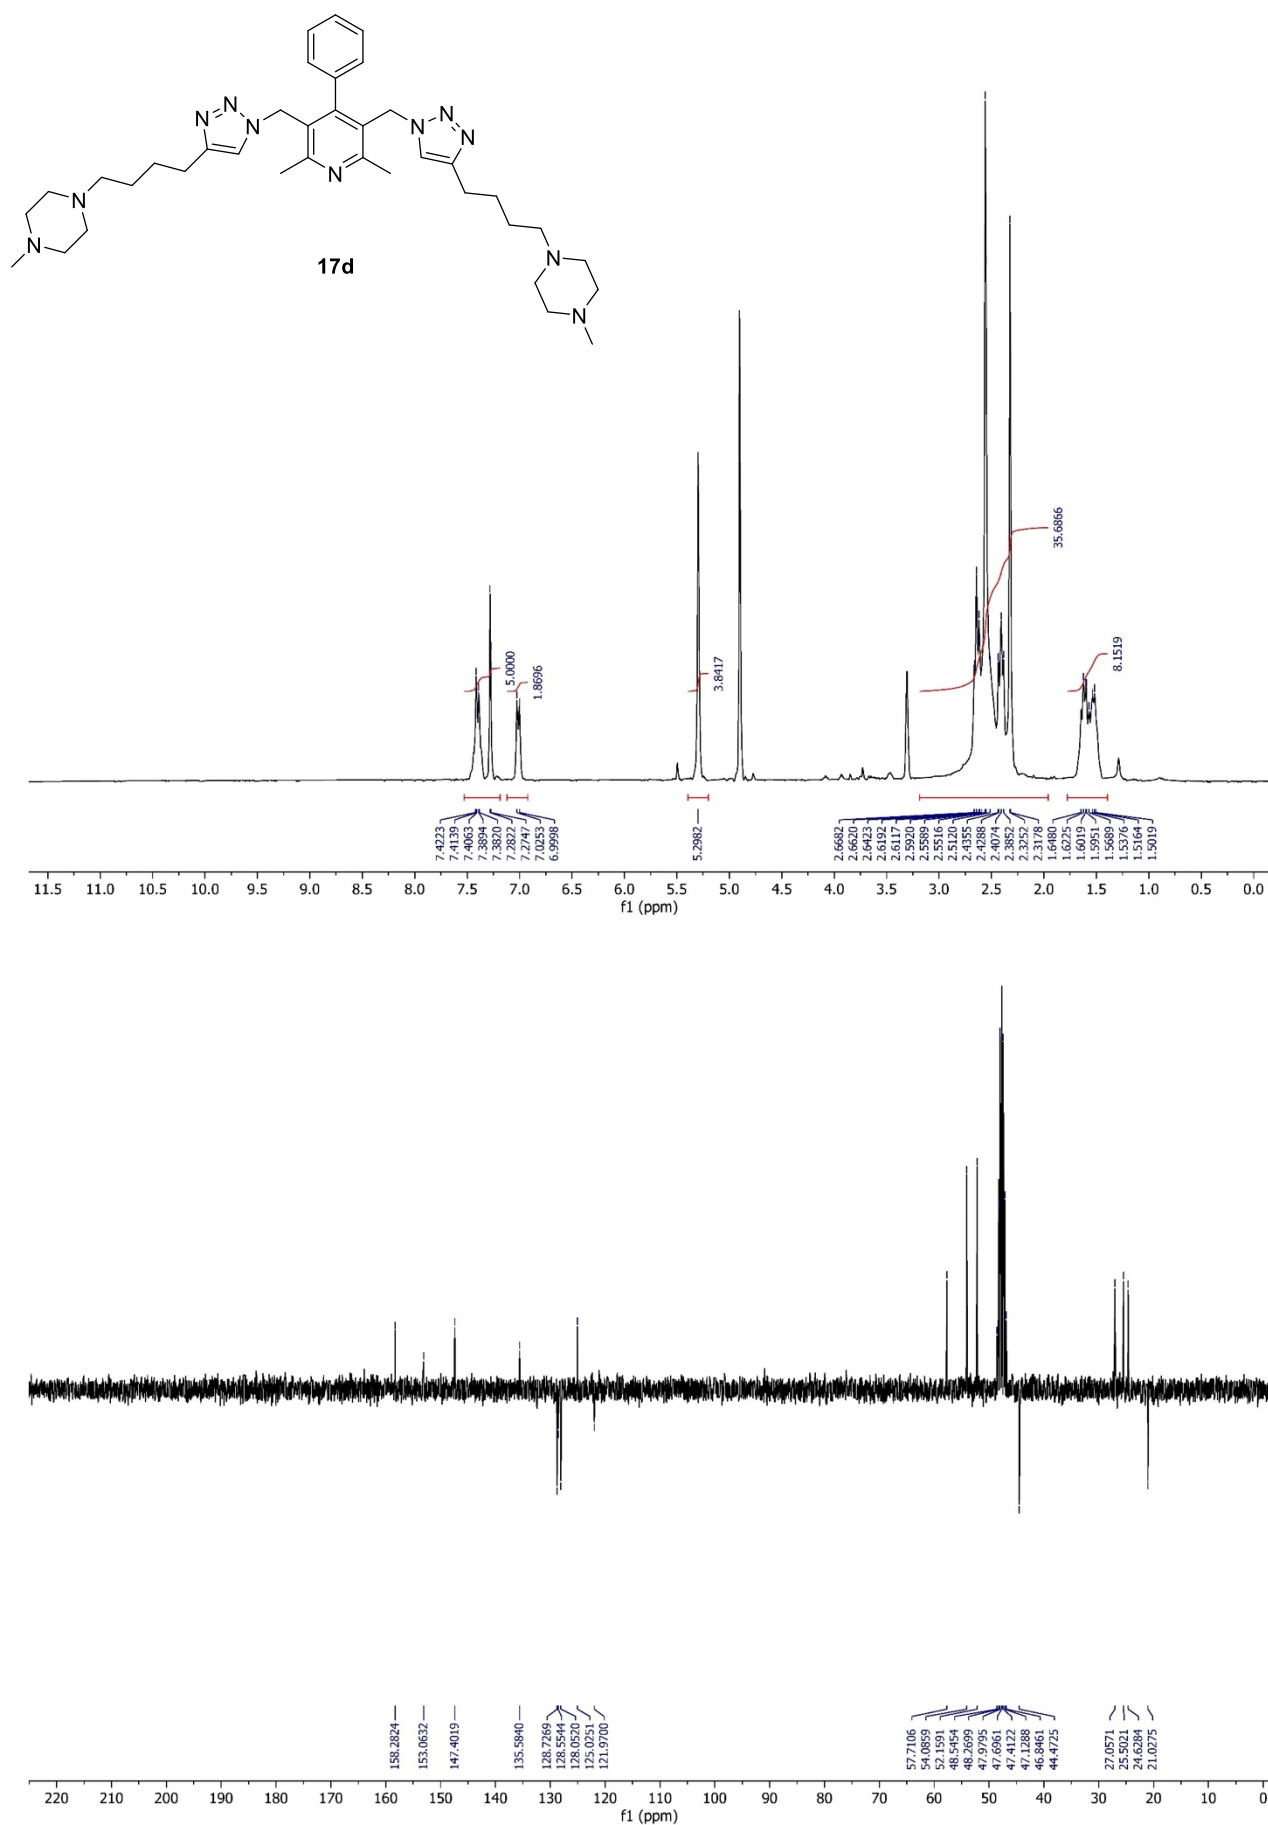

**Figure S44.** 1D <sup>1</sup>H (top) and <sup>13</sup>C APT (bottom) NMR spectra of compound **17d**.

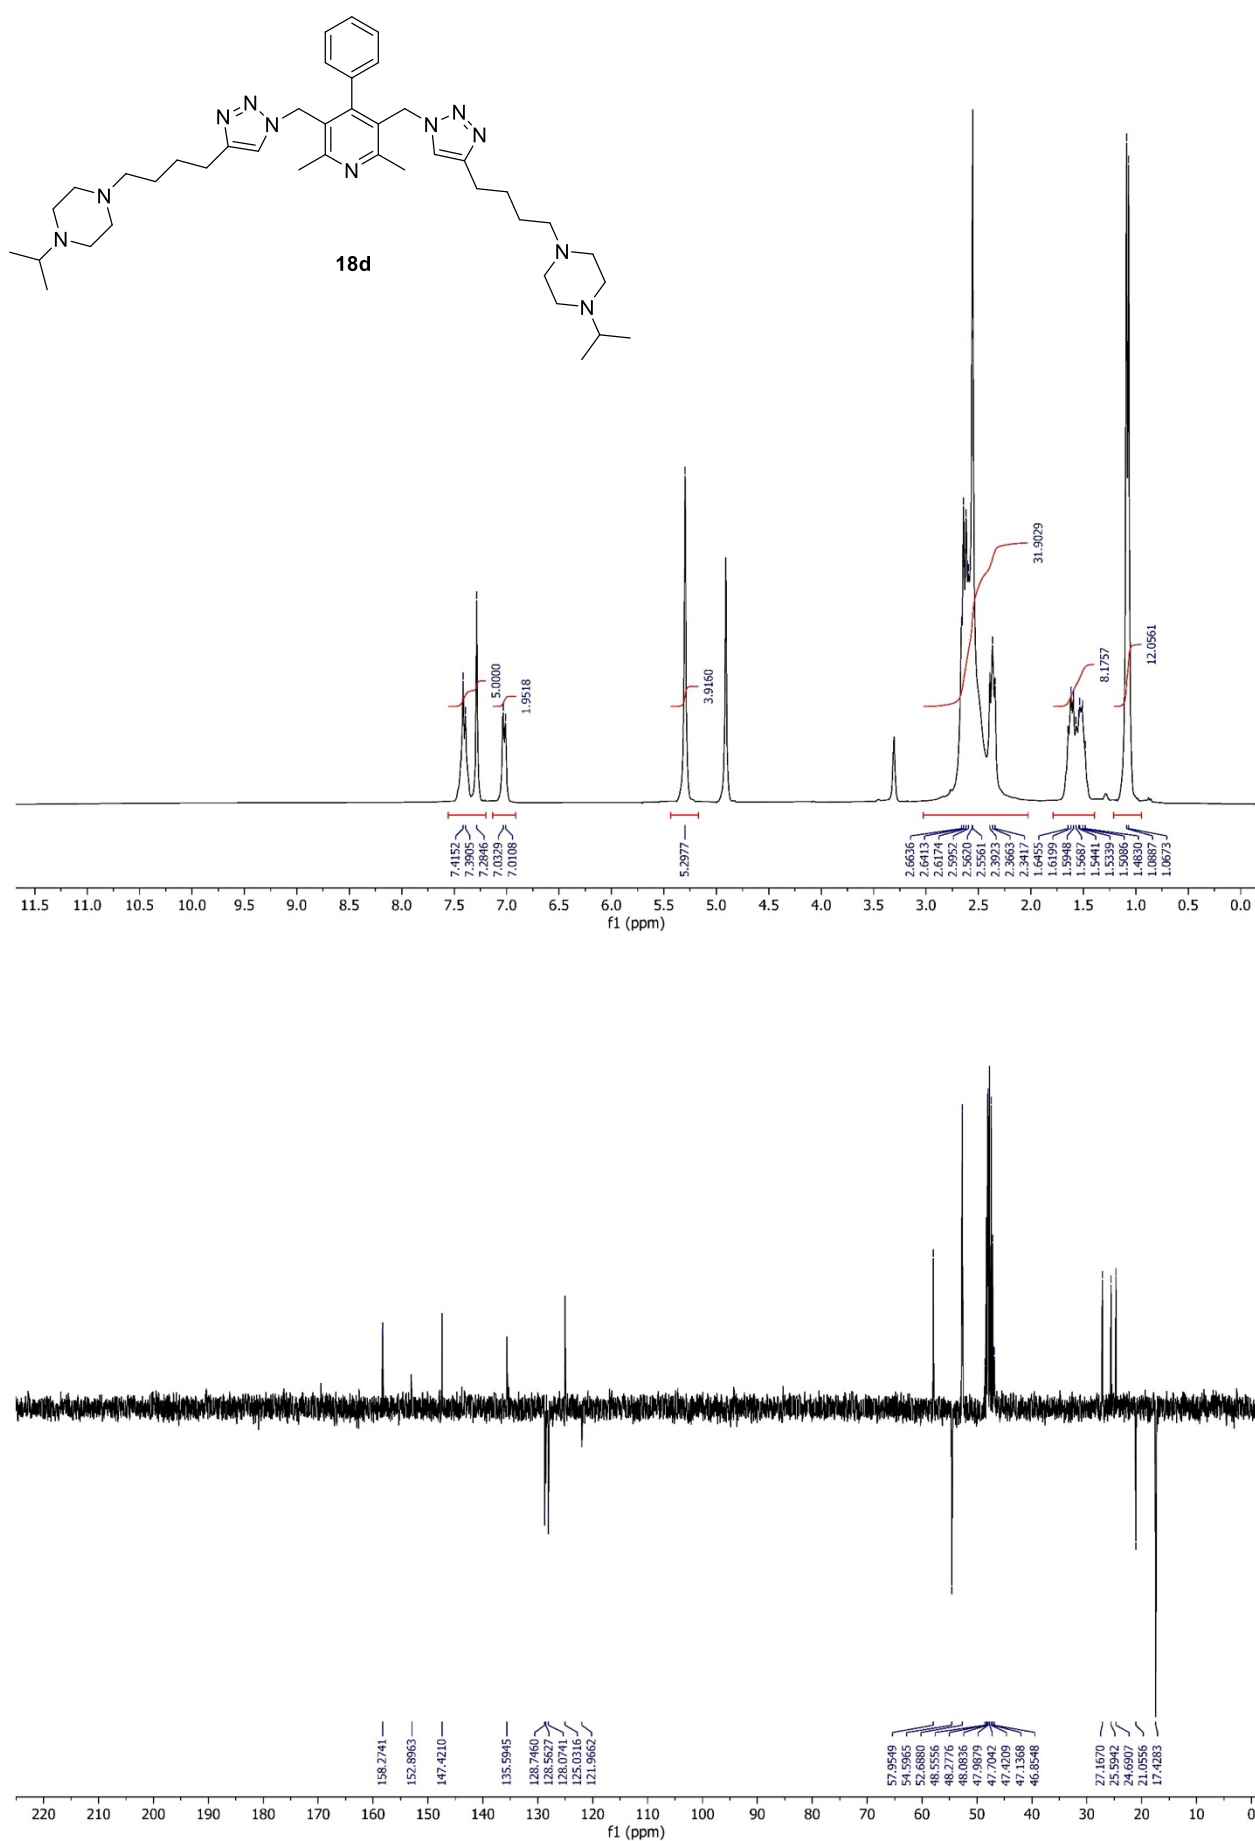

**Figure S45.** 1D <sup>1</sup>H (top) and <sup>13</sup>C APT (bottom) NMR spectra of compound **18d**.

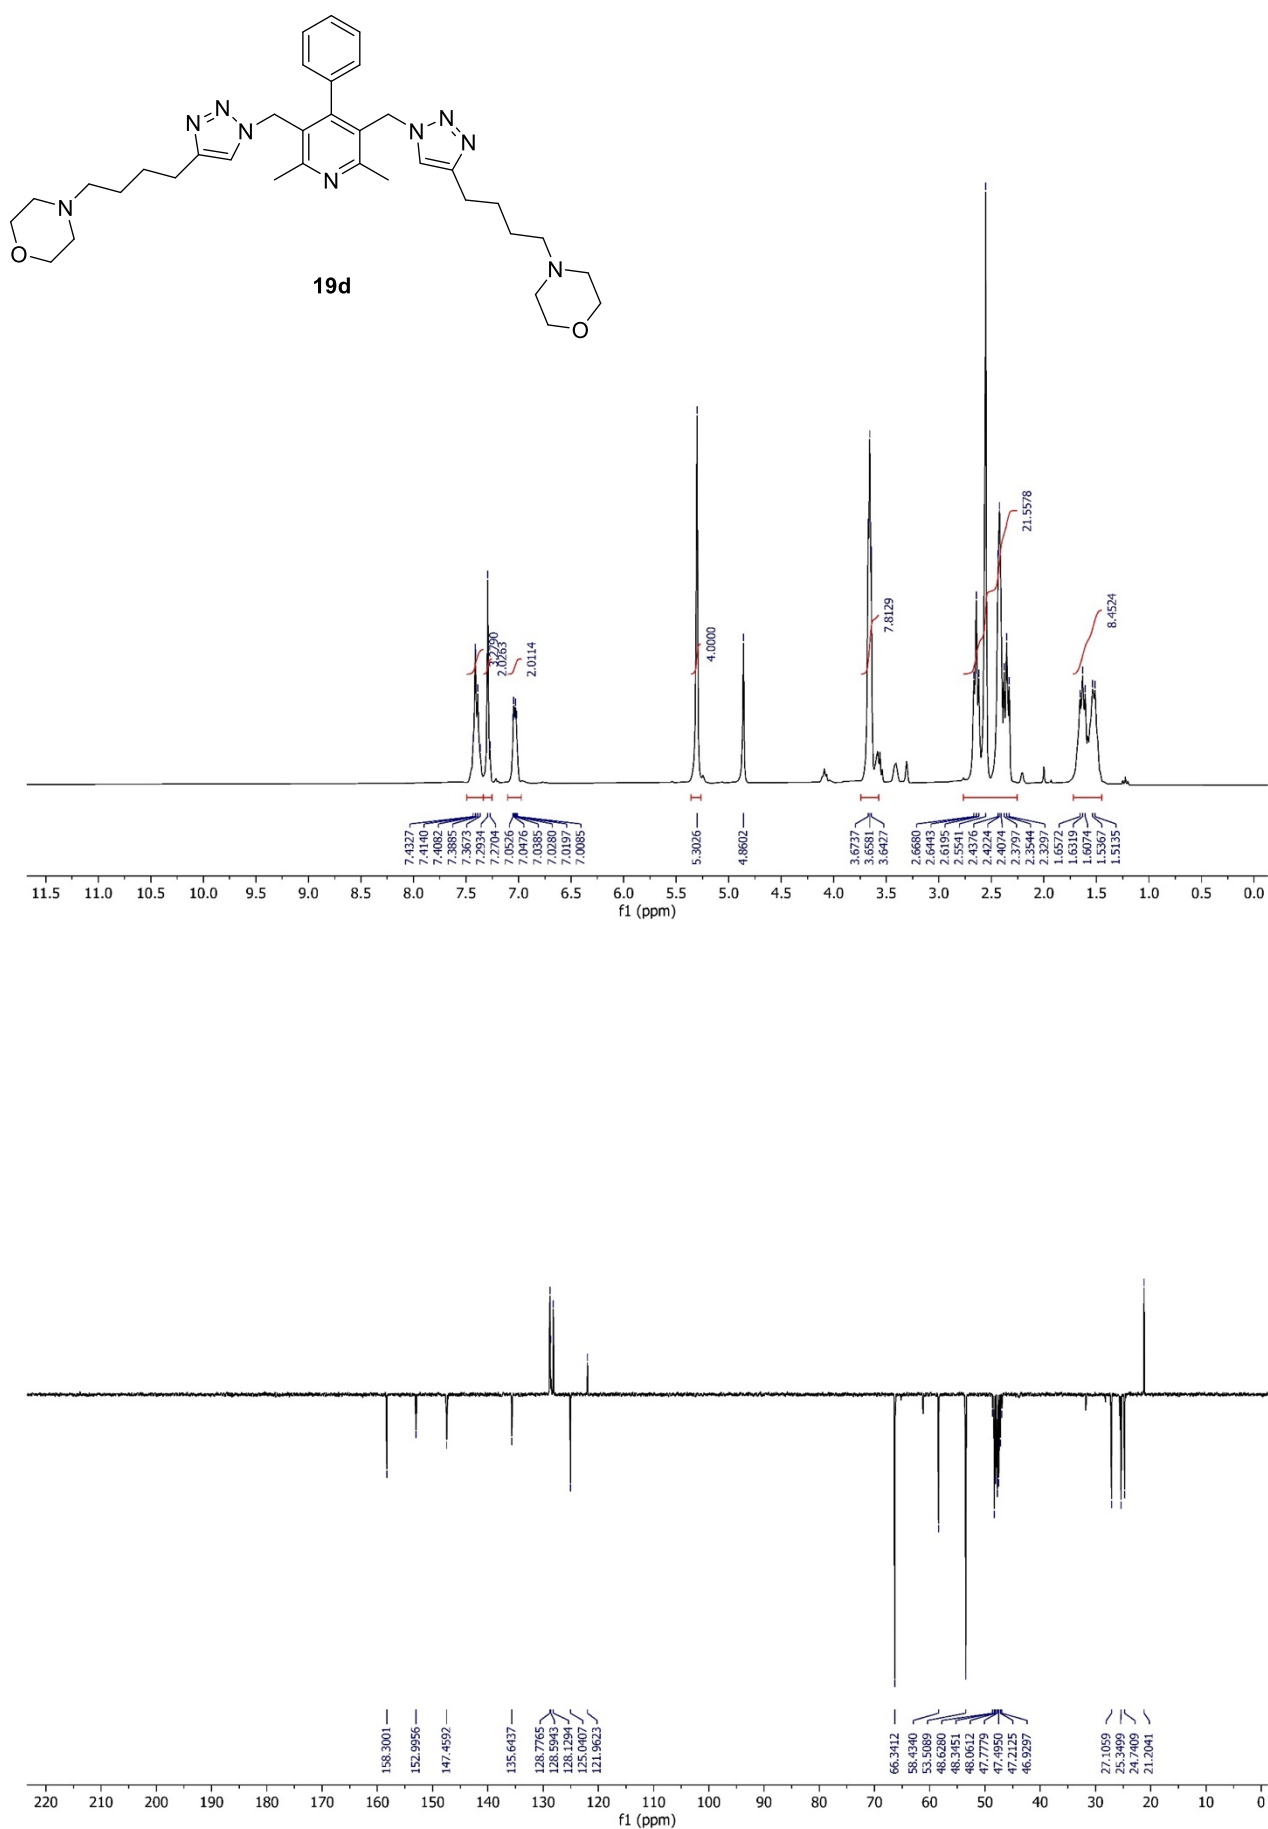

**Figure S46.** 1D <sup>1</sup>H (top) and <sup>13</sup>C APT (bottom) NMR spectra of compound **19d**.

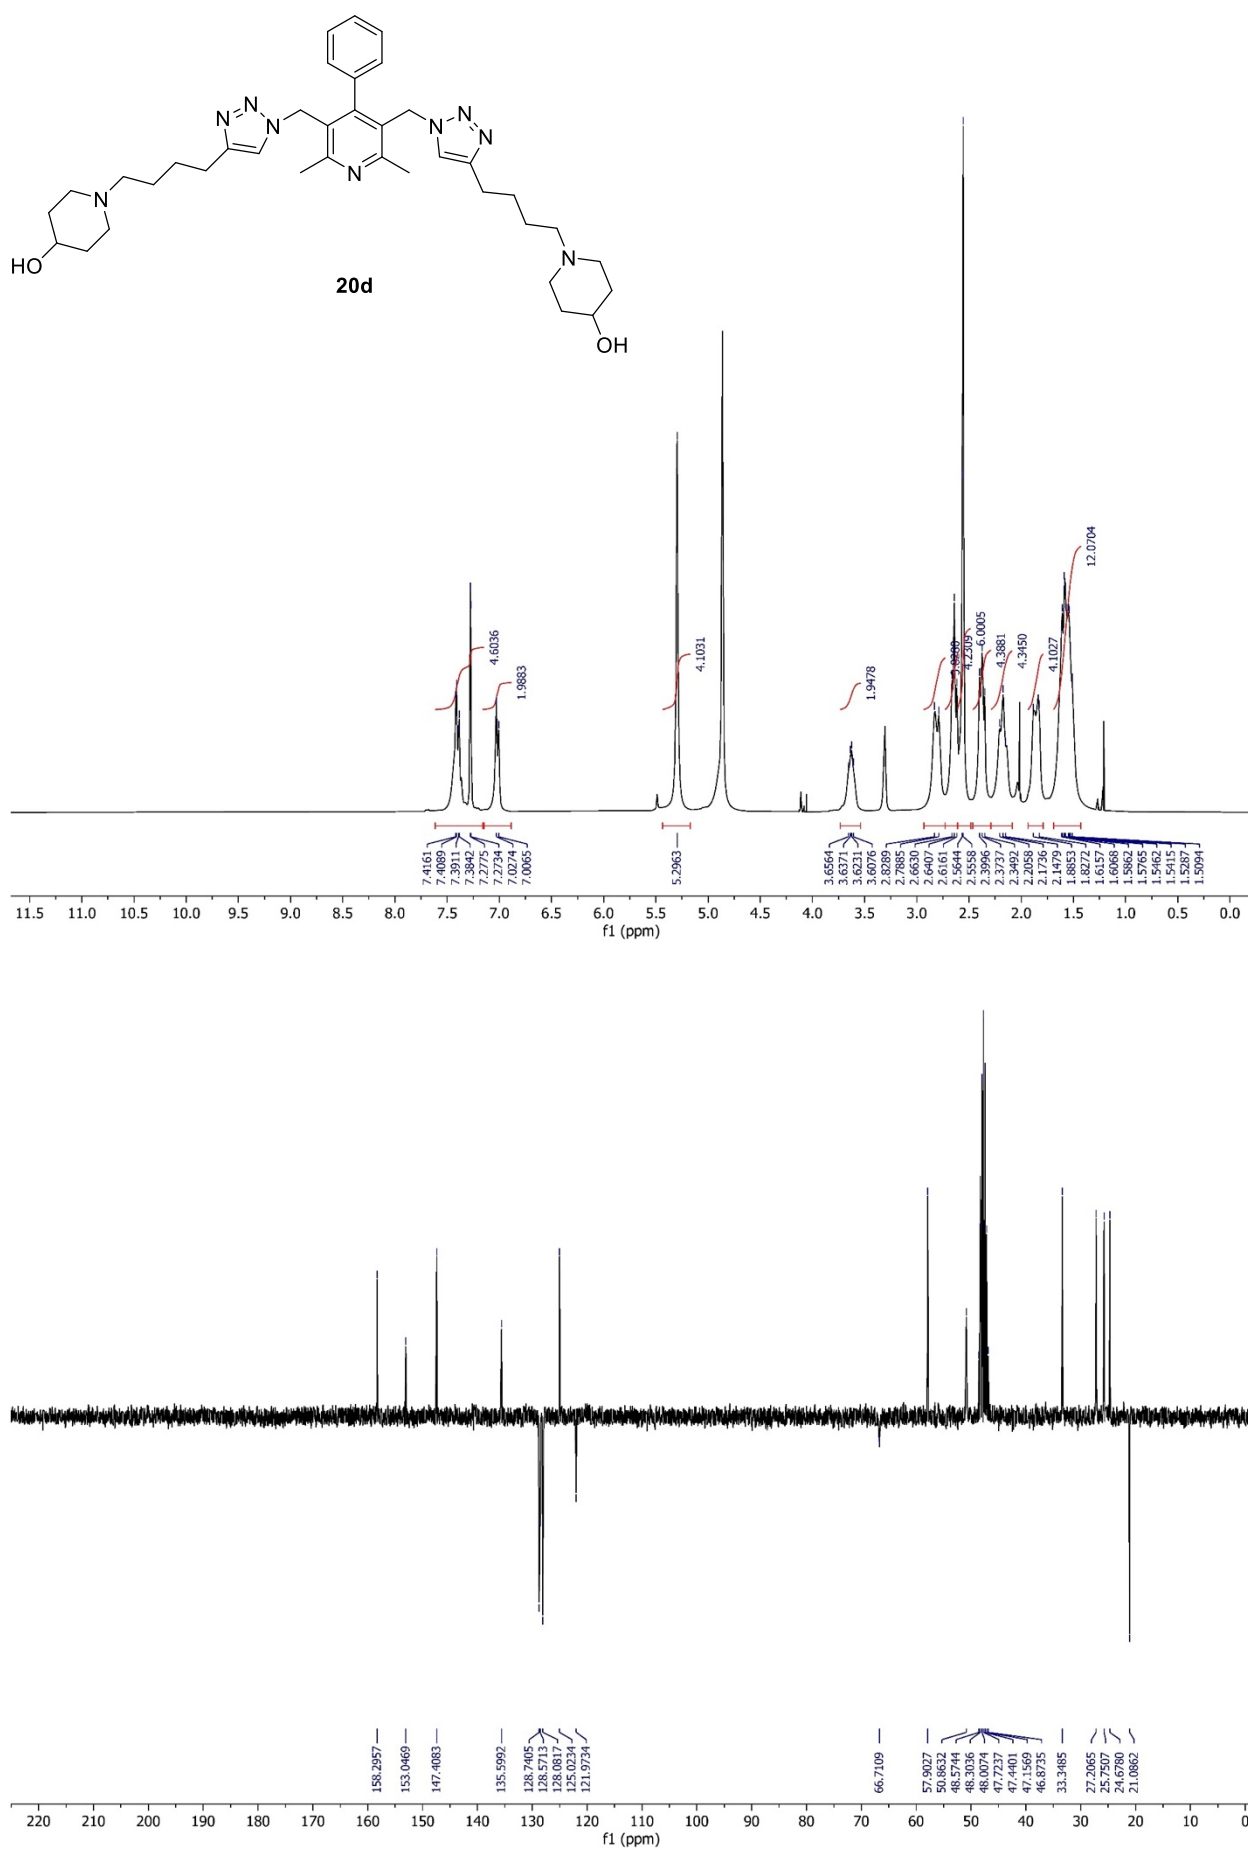

**Figure S47.** 1D <sup>1</sup>H (top) and <sup>13</sup>C APT (bottom) NMR spectra of compound **20d**.

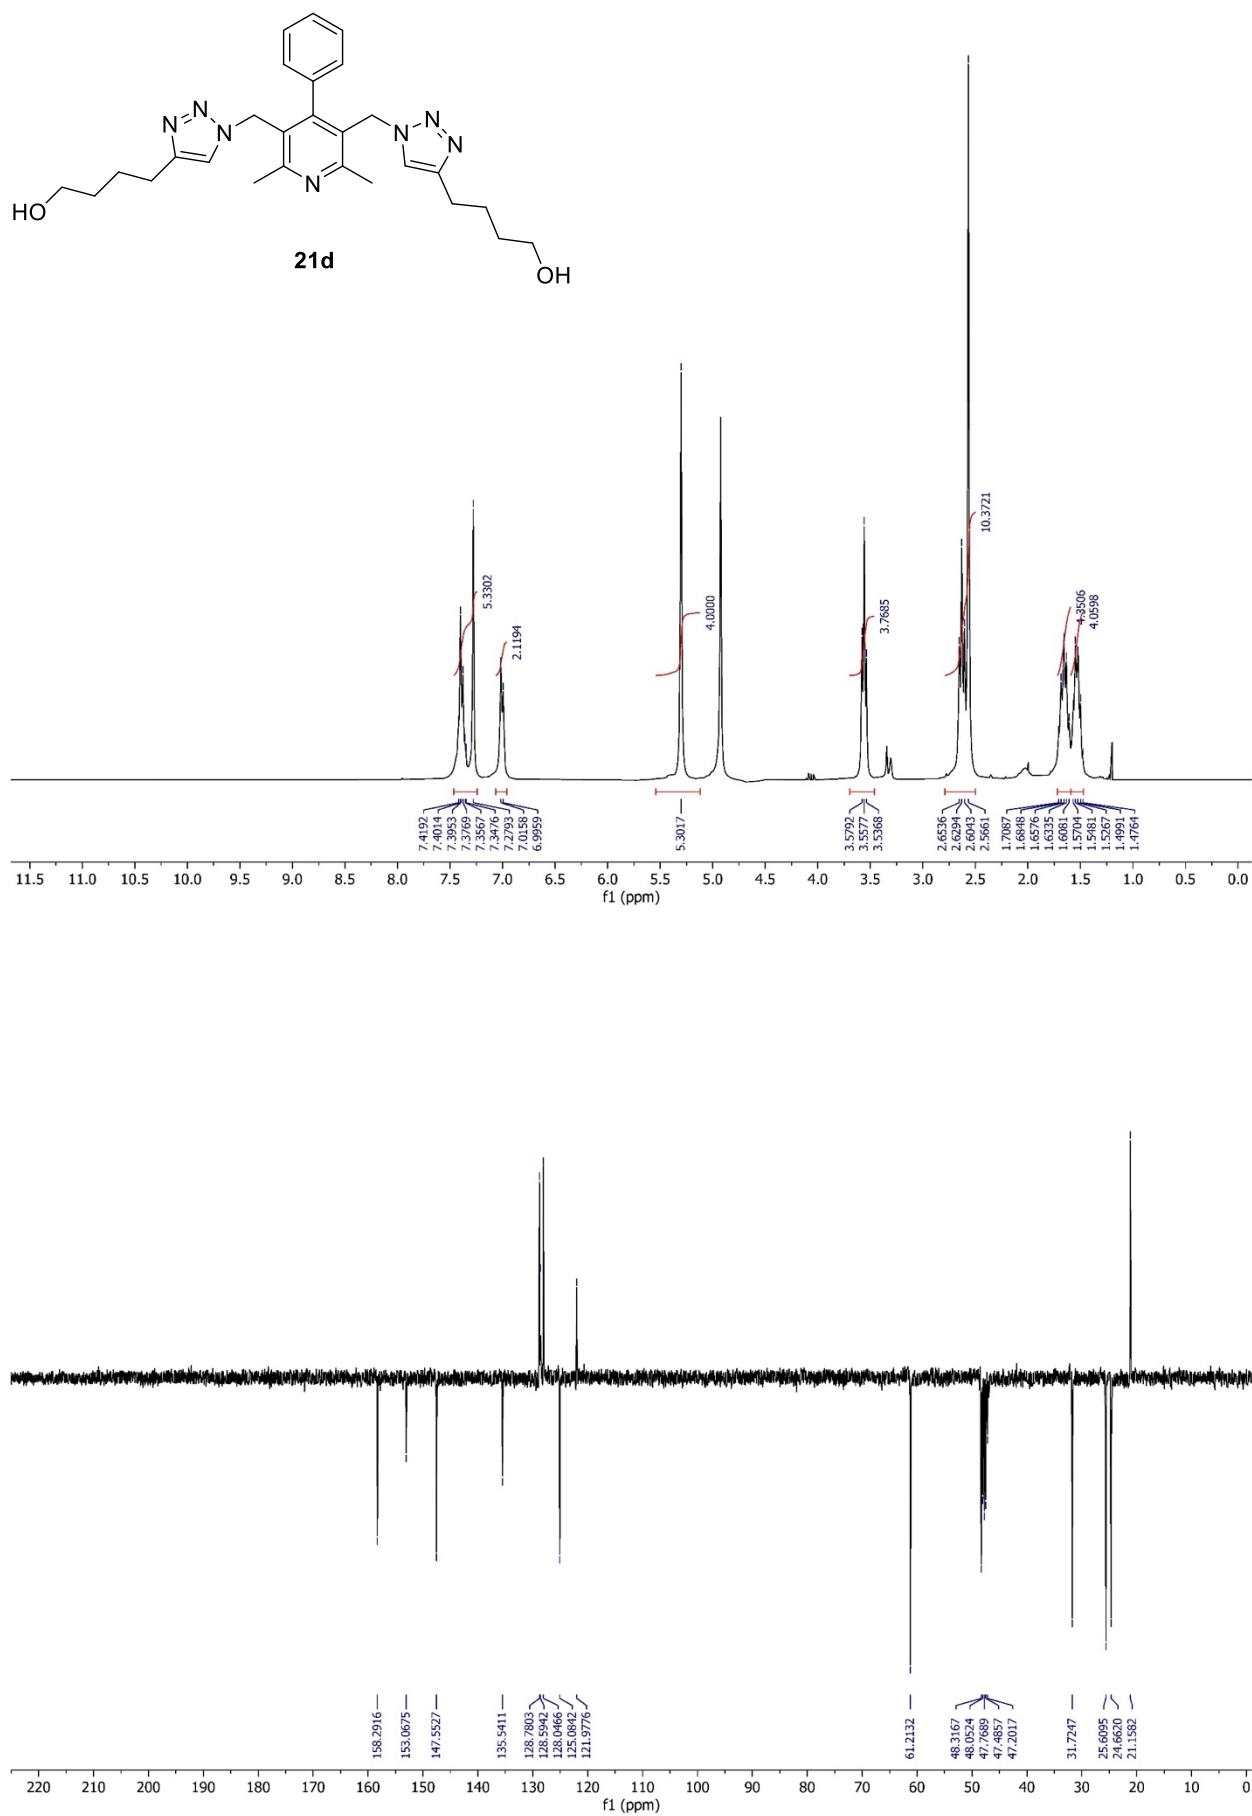

**Figure S48.** 1D <sup>1</sup>H (top) and <sup>13</sup>C APT (bottom) NMR spectra of compound **21d**.

## References

1. Kushwaha, K.; Kaushik, N.; Lata; Jain, S.C. Design and synthesis of novel 2H-chromen-2-one derivatives bearing 1,2,3-triazole moiety as lead antimicrobials. *Bioorg. Med. Chem. Lett.* **2014**, *24*, 1795–1801, doi:10.1016/j.bmcl.2014.02.027.
2. Lv, X.; Ying, H.; Ma, X.; Qiu, N.; Wu, P.; Yang, B.; Hu, Y. Design, synthesis and biological evaluation of novel 4-alkynyl-quinoline derivatives as PI3K/mTOR dual inhibitors. *Eur. J. Med. Chem.* **2015**, *99*, 36–50, doi:10.1016/j.ejmech.2015.05.025.
3. Xue, Y.; Zhang, S.-S.; Cui, K.; Huang, J.; Zhao, Q.-L.; Lan, P.; Cao, S.-K.; Ma, Z. New polymethylene-based AB 2 star copolymers synthesized via a combination of polyhomologation of ylides and atom transfer radical polymerization. *RSC Adv.* **2015**, *5*, 7090–7097, doi:10.1039/C4RA14504F.
4. Dvorak, C.A.; Apodaca, R.; Xiao, W.; Jablonowski, J.A.; Bonaventure, P.; Dugovic, C.; Shelton, J.; Lord, B.; Miller, K.; Dvorak, L.K. Diamine-based human histamine H3 receptor antagonists: (4-Aminobutyn-1-yl)benzylamines. *Eur. J. Med. Chem.* **2009**, *44*, 4098–4106, doi:10.1016/j.ejmech.2009.04.049.
5. Karabiyikoglu, S.; Merlic, C.A. Transannular [4 + 2] Cycloaddition Reactions of Cobalt-Complexed Macrocyclic Dienynes. *Org. Lett.* **2015**, *17*, 4086–4089, doi:10.1021/acs.orglett.5b01984.
6. Cui, L.; Ye, L.; Zhang, L. Gold-catalyzed efficient synthesis of azepan-4-ones via a two-step [5 + 2] annulation. *Chem. Commun.* **2010**, *46*, 3351, doi:10.1039/c001314e.
7. Mizuno, A.; Kusama, H.; Iwasawa, N. Rhodium(I)-Catalyzed [4+1] Cycloaddition Reactions of  $\alpha,\beta$ -Unsaturated Imines with Terminal Alkynes for the Preparation of Pyrrole Derivatives. *Angew. Chemie Int. Ed.* **2009**, *48*, 8318–8320, doi:10.1002/anie.200904402.
